# Supplementary material for: Lewis acid catalyzed spiro annulation of (Z)-3-amino-acrylates with 2-amino arylbenzamides: one-pot synthesis of pyrrole–quinazoline hybrids
Source: Royal Society of Chemistry journal article supplement (doi:10.1039/d3ra02639f), 2023-01-01

## Lewis acid catalyzed spiro annulation of (*Z*)-3-amino-acrylates with 2-amino arylbenzamides: One-pot synthesis of pyrrole-quinazoline hybrids

Anil Kumar Soda,<sup>\*a,b</sup> Krishna Prasad Chinthapally,<sup>a</sup> Phani Krishna C. S,<sup>a,b</sup> Sai Krishna Chilaka,<sup>a,b</sup> and Sridhar Madabhushi<sup>\*a,b</sup>

<sup>a</sup>Fluoro-Agro Chemicals Department, CSIR-Indian Institute of Chemical Technology, Hyderabad-500007, India

<sup>b</sup>Academy of Scientific and Innovative Research (AcSIR), Ghaziabad- 201002, India.

E-mail: [sridharm@iict.res.in](mailto:sridharm@iict.res.in)

### Supporting Information

Table of contents:

|                                                                                                                 |       |
|-----------------------------------------------------------------------------------------------------------------|-------|
| Supporting information and experimental data .....                                                              | 2-9   |
| <sup>1</sup> H, <sup>13</sup> C NMR, IR and HRMS spectra's for compounds ( <b>3a-s</b> , <b>5&amp;7</b> ) ..... | 10-51 |

## Supporting Information

Melting points of all the compounds were recorded on Veego programmable melting point apparatus and are uncorrected. IR spectra were recorded on a PerkinElmer FT-IR 240-C spectrophotometer using KBr optics.  $^1\text{H}$  and  $^{13}\text{C}$  NMR spectra were recorded on Bruker AV 400 MHz in  $\text{CDCl}_3$  and  $\text{DMSO-}d_6$  using TMS as internal standard. high resolution mass spectra (HRMS) [ $\text{ESI}^+$ ] were obtained using either a TOF or a double focusing spectrometer, micro mass VG 70–70H or LC/MSD trap SL spectrometer operating at 70 eV using direct inlet system. All the reactions were monitored by thin layer chromatography (TLC) on percolated silica gel 60 F254 (mesh); spots were visualized with UV light. Merck silica gel (60-120 mesh) was used for column chromatography.

### **General procedure for synthesis of ethyl 2,4'-dioxo-5-phenyl-3'-(alkyl/aryl)-1,2,3',4'-tetrahydro-1'*H*-spiro[pyrrole-3,2'-quinazoline]-4-carboxylates (3a-s)**

Ethyl (*Z*)-3-amino-3-phenylacrylates (**1a-d**, 1 equiv.) and oxalyl chloride (1 equiv.) were reacted in 2 mL of  $\text{CH}_3\text{CN}$ :1,4-dioxane (5:1) at reflux for 2 h. After confirming the formation of intermediate **A** by TLC, then 2-amino *N*-aryl/alkyl benzamides (**2a-p**, 1 equiv.) and  $\text{Bi}(\text{OTf})_3$  (10 mol%) were added and stirred for 2-4 h under reflux. Upon the completion of the reaction (monitored by TLC), the reaction mixture was concentrated under reduced pressure. The crude product was purified by column chromatography on silica gel using EtOAc/hexane as an eluent to afford the corresponding ethyl 2,4'-dioxo-5-phenyl-3'-(alkyl/aryl)-1,2,3',4'-tetrahydro-1'*H*-spiro[pyrrole-3,2'-quinazoline]-4-carboxylates (**3a-s**) in 72-90% yields.

### **Ethyl 2,4'-dioxo-3',5-diphenyl-1,2,3',4'-tetrahydro-1'*H*-spiro[pyrrole-3,2'-quinazoline]-4-carboxylate (3a)**

Wheatish solid; (yield: 84%), m.p.: 245-247 °C;  $^1\text{H}$  NMR (400 MHz,  $\text{CDCl}_3$ ):  $\delta$  7.94 (1H, s), 7.89 (1H, d,  $J = 7.8$  Hz), 7.40-7.36 (1H, m), 7.31-7.26 (6H, m), 7.18-7.16 (2H, m), 7.10 (1H, s), 7.08 (1H, d,  $J = 1.3$  Hz), 6.87 (1H, t,  $J = 7.1$  Hz), 6.65 (1H, d,  $J = 7.8$  Hz), 5.11 (1H, s), 4.0 (2H, q,  $J = 7.0, 5.2$  Hz), 0.94 (3H, t,  $J = 7.1$  Hz);  $^{13}\text{C}$  NMR (100 MHz,  $\text{CDCl}_3 + \text{DMSO-}d_6$ ):  $\delta$  181.17, 168.26, 167.29, 160.30, 150.56, 142.53, 138.32, 135.55, 134.42, 134.14, 133.56, 133.30, 133.08, 132.63, 122.42, 119.00, 118.70, 112.14, 83.83, 64.45, 18.58; FT-IR (KBr):  $\nu$  3282, 3062, 2926,

2855, 1751, 1694, 1639, 1492, 1106, 755  $\text{cm}^{-1}$ ; ESI-MS:  $m/z$  440  $[\text{M}+\text{H}]^+$ ; ESI-HRMS: calcd for  $\text{C}_{26}\text{H}_{22}\text{N}_3\text{O}_4$   $[\text{M}+\text{H}]^+$  440.16048; found: 440.15943.

**Ethyl 2,4'-dioxo-5-phenyl-3'-(*p*-tolyl)-1,2,3',4'-tetrahydro-1'*H*-spiro[pyrrole-3,2'-quinazoline]-4-carboxylate (3b)**

Brown solid; (yield: 86%), m.p.: 262-266  $^{\circ}\text{C}$ ;  $^1\text{H}$  NMR (400 MHz,  $\text{CDCl}_3$  +  $\text{DMSO}-d_6$ ):  $\delta$  10.34 (1H, s), 7.78 (1 H, d,  $J = 6.8$  Hz), 7.40 (1H, d,  $J = 7.2$  Hz), 7.34 (2H, t,  $J = 7.4$  Hz), 7.24 (3H, d,  $J = 7.1$  Hz), 7.14-7.11 (4H, m), 6.85 (1H, s), 6.72-6.65 (2H, m), 3.98 (2H, q,  $J = 13.2, 6.0$  Hz), 2.33 (3H, s), 0.91 (3H, t,  $J = 9.1$  Hz);  $^{13}\text{C}$  NMR (100 MHz,  $\text{CDCl}_3$  +  $\text{DMSO}-d_6$ ):  $\delta$  181.34, 168.24, 167.26, 160.19, 150.91, 142.71, 139.91, 138.40, 135.61, 134.28, 134.20, 133.46, 132.72, 132.58, 132.40, 121.98, 118.69, 118.22, 112.30, 83.93, 64.37, 26.01, 18.67; FT-IR (KBr):  $\nu$  3278, 3022, 2992, 2856, 1750, 1689, 1639, 1515, 1369, 1104, 752  $\text{cm}^{-1}$ ; ESI-MS:  $m/z$  454  $[\text{M}+\text{H}]^+$ ; ESI-HRMS: calcd for  $\text{C}_{27}\text{H}_{24}\text{N}_3\text{O}_4$   $[\text{M}+\text{H}]^+$  454.17613; found: 454.17504.

**Ethyl 3'-(4-methoxyphenyl)-2,4'-dioxo-5-phenyl-1,2,3',4'-tetrahydro-1'*H*-spiro[pyrrole-3,2'-quinazoline]-4-carboxylate (3c)**

Wheatish solid; (yield: 90%), m.p.: 252-254  $^{\circ}\text{C}$ ;  $^1\text{H}$  NMR (400 MHz,  $\text{CDCl}_3$  +  $\text{DMSO}-d_6$ ):  $\delta$  10.29 (1H, s), 7.80 (1H, d,  $J = 7.6$  Hz), 7.41 (1H, d,  $J = 7.0$  Hz), 7.35 (2H, t,  $J = 6.9$  Hz), 7.28-7.22 (3H, m), 7.16 (2H, d,  $J = 7.7$  Hz), 6.85 (2H, d,  $J = 7.5$  Hz), 6.73-6.64 (3H, m), 3.99 (2H, q,  $J = 12.7, 5.5$  Hz), 3.78 (3H, s), 0.91 (3H, t,  $J = 7.1$  Hz);  $^{13}\text{C}$  NMR (100 MHz,  $\text{CDCl}_3$  +  $\text{DMSO}-d_6$ ):  $\delta$  181.20, 168.41, 167.38, 163.90, 159.99, 150.62, 138.25, 135.54, 134.95, 134.48, 134.16, 133.39, 132.82, 132.64, 122.21, 118.98, 118.73, 118.49, 112.40, 84.07, 64.43, 60.21, 18.56; FT-IR (KBr):  $\nu$  3391, 3191, 3010, 2921, 2851, 1752, 1680, 1645, 1510, 1070, 751  $\text{cm}^{-1}$ ; ESI-MS:  $m/z$  470  $[\text{M}+\text{H}]^+$ ; ESI-HRMS: calcd for  $\text{C}_{27}\text{H}_{24}\text{N}_3\text{O}_5$   $[\text{M}+\text{H}]^+$  470.17105; found: 470.17083.

**Ethyl 3'-(3,4-dimethoxyphenyl)-2,4'-dioxo-5-phenyl-1,2,3',4'-tetrahydro-1'*H*-spiro[pyrrole-3,2'-quinazoline]-4-carboxylate (3d)**

Orange solid; (yield: 87%), m.p.: 274-276  $^{\circ}\text{C}$ ;  $^1\text{H}$  NMR (400 MHz,  $\text{CDCl}_3$ ):  $\delta$  7.97 (1H, s), 7.79 (1H, d,  $J = 6.6$  Hz), 7.32 (1H, t,  $J = 7.4$  Hz), 7.21 (3H, t,  $J = 6.7$  Hz), 7.08 (2H, d,  $J = 7.5$  Hz), 6.76 (1H, t,  $J = 7.5$  Hz), 6.67 (1H, d,  $J = 1.3$  Hz), 6.62 (2H, s), 6.57 (1H, d,  $J = 8.0$  Hz), 5.09 (1H, s), 3.92 (2H, q,  $J = 7.0$  Hz), 3.72 (3H, s), 3.61 (3H, s), 0.86 (3H, t,  $J = 7.1$  Hz);  $^{13}\text{C}$  NMR (100 MHz,  $\text{CDCl}_3$ ):  $\delta$  175.54, 164.01, 162.66, 148.86, 144.29, 133.69, 131.24, 130.07, 129.76, 129.67, 129.29, 128.53, 128.46, 128.38, 128.32, 128.12, 119.69, 115.82, 115.54, 112.68, 111.04, 78.94,

60.27, 55.91, 55.84, 13.77; FT-IR (KBr):  $\nu$  3020, 1752, 1641, 1514, 1372, 1327, 1214, 1104, 749  $\text{cm}^{-1}$ ; ESI-MS:  $m/z$  500  $[\text{M}+\text{H}]^+$ ; ESI-HRMS: calcd for  $\text{C}_{28}\text{H}_{26}\text{N}_3\text{O}_6$   $[\text{M}+\text{H}]^+$  500.18161; found: 500.18022.

**Ethyl 2,4'-dioxo-5-phenyl-1,2,3',4'-tetrahydro-1'H-spiro[pyrrole-3,2'-quinazoline]-4-carboxylate (3e)**

white solid; (yield: 72%), m.p.: 231-233 °C;  $^1\text{H}$  NMR (400 MHz,  $\text{CDCl}_3$ ):  $\delta$  12.36 (1H, s), 9.71 (1H, s), 8.19 (1H, d,  $J = 6.8$  Hz), 7.83 (1H, d,  $J = 8.0$  Hz), 7.70 (1H, t,  $J = 7.5$  Hz), 7.45 (1H, t,  $J = 7.0$  Hz), 7.31-7.29 (1H, m), 7.27 (3H, s), 7.09 (1H, s), 5.37 (1H, s), 4.16 (2H, q,  $J = 7.1$  Hz), 1.20 (3H, t,  $J = 7.1$  Hz);  $^{13}\text{C}$  NMR (100 MHz,  $\text{CDCl}_3$ ):  $\delta$  167.72, 160.56, 157.42, 151.53, 147.15, 143.28, 135.00, 130.03, 129.09, 128.97, 128.29, 127.31, 126.99, 123.08, 105.15, 77.25, 60.73, 14.36; FT-IR (KBr):  $\nu$  3214, 2922, 2853, 1685, 1515, 1474, 1295, 1215, 1184, 758  $\text{cm}^{-1}$ ; ESI-MS:  $m/z$  364  $[\text{M}+\text{H}]^+$ ; ESI-HRMS: calcd for  $\text{C}_{20}\text{H}_{18}\text{N}_3\text{O}_4$   $[\text{M}+\text{H}]^+$  364.12918; found: 364.12824.

**Ethyl 3'-(4-fluorophenyl)-2,4'-dioxo-5-phenyl-1,2,3',4'-tetrahydro-1'H-spiro[pyrrole-3,2'-quinazoline]-4-carboxylate (3f)**

Pale yellow solid; (yield: 75%), m.p.: 244-246 °C;  $^1\text{H}$  NMR (400 MHz,  $\text{CDCl}_3 + \text{DMSO-}d_6$ ):  $\delta$  10.34 (1H, s), 7.81 (1H, d,  $J = 7.7$  Hz), 7.42 (1H, t,  $J = 7.2$  Hz), 7.35 (2H, t,  $J = 7.5$  Hz), 7.26 (5H, d,  $J = 6.6$  Hz), 7.04 (2H, t,  $J = 8.5$  Hz), 6.75-6.67 (3H, m), 4.00 (2H, q,  $J = 13.3, 6.0$  Hz), 0.91 (3H, t,  $J = 7.1$  Hz);  $^{13}\text{C}$  NMR (100 MHz,  $\text{CDCl}_3 + \text{DMSO-}d_6$ ):  $\delta$  181.17, 168.48, 167.97, 167.29, 165.51, 160.42, 150.71, 138.57, 138.45, 136.33, 135.72, 134.02, 133.36, 132.75, 132.63, 122.29, 120.57, 120.35, 118.88, 118.11, 111.96, 83.99, 64.54, 18.58; FT-IR (KBr):  $\nu$  3280, 3020, 2928, 2857, 1751, 1689, 1642, 1508, 1369, 1216, 1104, 754  $\text{cm}^{-1}$ ; ESI-MS:  $m/z$  458  $[\text{M}+\text{H}]^+$ ; ESI-HRMS: calcd for  $\text{C}_{26}\text{H}_{21}\text{FN}_3\text{O}_4$   $[\text{M}+\text{H}]^+$  458.15106; found: 458.14993.

**Ethyl 3'-(4-bromophenyl)-2,4'-dioxo-5-phenyl-1,2,3',4'-tetrahydro-1'H-spiro[pyrrole-3,2'-quinazoline]-4-carboxylate (3g)**

Pale brown solid; (yield: 76%), m.p.: 251-253 °C;  $^1\text{H}$  NMR (400 MHz,  $\text{CDCl}_3 + \text{DMSO-}d_6$ ):  $\delta$  10.37 (1H, s), 7.81 (1H, d,  $J = 7.7$  Hz), 7.47 (3H, d,  $J = 8.6$  Hz), 7.43 (1H, d,  $J = 7.4$  Hz), 7.37 (2H, t,  $J = 7.5$  Hz), 7.28 (3H, d,  $J = 7.4$  Hz), 7.15 (2H, d,  $J = 8.6$  Hz), 6.74 (1H, t,  $J = 7.5$  Hz), 6.68 (2H, d,  $J = 10.4$  Hz), 3.99 (2H, q,  $J = 12.6, 5.3$  Hz), 0.92 (3H, t,  $J = 7.1$  Hz);  $^{13}\text{C}$  NMR (100 MHz,  $\text{CDCl}_3 + \text{DMSO-}d_6$ ):  $\delta$  181.09, 168.16, 167.17, 160.46, 150.87, 141.83, 138.64, 136.69, 136.44, 135.78, 134.06, 133.43, 132.79, 132.57, 126.73, 122.14, 118.80, 117.91, 111.85, 83.83,

64.49, 18.64; FT-IR (KBr):  $\nu$  3021, 2926, 1751, 1641, 1488, 1418, 1366, 1214, 747  $\text{cm}^{-1}$ ; ESI-MS:  $m/z$  518  $[\text{M}+\text{H}]^+$ ; ESI-HRMS: calcd for  $\text{C}_{26}\text{H}_{21}\text{BrN}_3\text{O}_4$   $[\text{M}+\text{H}]^+$  518.07100; found: 518.06969.

**Ethyl 3'-benzyl-2,4'-dioxo-5-phenyl-1,2,3',4'-tetrahydro-1'H-spiro[pyrrole-3,2'-quinazoline]-4-carboxylate (3h)**

Pale yellow solid; (yield: 82%), m.p.: 284-286  $^{\circ}\text{C}$ ;  $^1\text{H}$  NMR (400 MHz,  $\text{CDCl}_3$  +  $\text{DMSO}-d_6$ ):  $\delta$  10.28 (1H, s), 7.89 (1H, d,  $J = 7.8$  Hz), 7.46-7.39 (5H, m), 7.31 (2H, d,  $J = 4.9$  Hz), 7.22-7.18 (4H, m), 6.76 (1H, t,  $J = 7.7$  Hz), 6.62 (1H, d,  $J = 8.0$  Hz), 6.30 (1H, s), 4.70 (1H, s), 3.87-3.82 (2H, q,  $J = 6.9, 4.4$  Hz), 0.91 (3H, t,  $J = 6.9$  Hz);  $^{13}\text{C}$  NMR (100 MHz,  $\text{CDCl}_3$  +  $\text{DMSO}-d_6$ ):  $\delta$  175.82, 163.83, 162.23, 155.68, 144.88, 137.56, 133.14, 130.92, 128.91, 128.85, 128.32, 128.10, 127.88, 127.70, 127.02, 118.07, 114.53, 114.27, 106.32, 77.67, 59.57, 46.39, 13.59; FT-IR (KBr):  $\nu$  3300, 3018, 2923, 2854, 1749, 1694, 1620, 1491, 1215, 1092, 748  $\text{cm}^{-1}$ ; ESI-MS:  $m/z$  454  $[\text{M}+\text{H}]^+$ ; ESI-HRMS: calcd for  $\text{C}_{27}\text{H}_{24}\text{N}_3\text{O}_4$   $[\text{M}+\text{H}]^+$  454.17613; found: 454.17506.

**Ethyl 3'-(4-methoxybenzyl)-2,4'-dioxo-5-phenyl-1,2,3',4'-tetrahydro-1'H-spiro[pyrrole-3,2'-quinazoline]-4-carboxylate (3i)**

Pale orange solid; (yield: 86%), m.p.: 262-264  $^{\circ}\text{C}$ ;  $^1\text{H}$  NMR (400 MHz,  $\text{CDCl}_3$  +  $\text{DMSO}-d_6$ ):  $\delta$  10.28 (1H, s), 7.89 (1H, d,  $J = 7.6$  Hz), 7.51-7.43 (5H, m), 7.26-7.20 (3H, m), 6.77-6.71 (3H, m), 6.61 (1H, d,  $J = 8.0$  Hz), 6.35 (1H, s), 4.81 (1H, d,  $J = 15.1$  Hz), 4.53 (1H, d,  $J = 15.2$  Hz), 3.89 (2H, q,  $J = 9.0, 3.4$  Hz), 3.74 (3H, s), 0.94 (3H, t,  $J = 7.1$  Hz);  $^{13}\text{C}$  NMR (100 MHz,  $\text{CDCl}_3$  +  $\text{DMSO}-d_6$ ):  $\delta$  175.83, 163.82, 162.31, 158.55, 155.69, 144.78, 133.11, 130.95, 129.82, 129.51, 128.95, 128.87, 127.93, 127.73, 118.11, 114.70, 114.27, 113.26, 106.19, 77.35, 59.63, 55.06, 45.72, 13.63; FT-IR (KBr):  $\nu$  3279, 2926, 2854, 1752, 1697, 1622, 1512, 1244, 1095, 753  $\text{cm}^{-1}$ ; ESI-MS:  $m/z$  484  $[\text{M}+\text{H}]^+$ ; ESI-HRMS: calcd for  $\text{C}_{28}\text{H}_{26}\text{N}_3\text{O}_5$   $[\text{M}+\text{H}]^+$  484.18670; found: 484.18471.

**Ethyl 3'-(tert-butyl)-2,4'-dioxo-5-phenyl-1,2,3',4'-tetrahydro-1'H-spiro[pyrrole-3,2'-quinazoline]-4-carboxylate (3j)**

Brown solid; (yield: 83%), m.p.: 214-216  $^{\circ}\text{C}$ ;  $^1\text{H}$  NMR (400 MHz,  $\text{CDCl}_3$  +  $\text{DMSO}-d_6$ ):  $\delta$  10.12 (1H, s), 8.49 (1H, s), 7.58 (2H, d,  $J = 7.9$  Hz), 7.46 (1H, d,  $J = 7.3$ ), 7.32-7.27 (3H, m), 7.06 (2H, t,  $J = 7.5$  Hz), 6.75 (1H, s), 4.03 (2H, q,  $J = 13.5, 5.6$  Hz), 1.45 (9H, s), 1.06 (3H, t,  $J = 7.1$  Hz);  $^{13}\text{C}$  NMR (100 MHz,  $\text{CDCl}_3$  +  $\text{DMSO}-d_6$ ):  $\delta$  167.46, 165.30, 162.55, 142.34, 139.53, 137.49,

129.27, 127.27, 126.94, 126.40, 125.64, 125.52, 122.52, 122.38, 110.59, 90.20, 59.46, 49.31, 28.23, 13.40; FT-IR (KBr):  $\nu$  3308, 3067, 2966, 2926, 2855, 1718, 1616, 1527, 1453, 1185, 762  $\text{cm}^{-1}$ ; ESI-MS:  $m/z$  420  $[\text{M}+\text{H}]^+$ ; ESI-HRMS: calcd for  $\text{C}_{24}\text{H}_{26}\text{N}_3\text{O}_4$   $[\text{M}+\text{H}]^+$  420.19178; found: 420.19091.

**Ethyl 3'-ethyl-2,4'-dioxo-5-phenyl-1,2,3',4'-tetrahydro-1'H-spiro[pyrrole-3,2'-quinazoline]-4-carboxylate (3k)**

Pale yellow solid; (yield: 80%), m.p.: 202-204 °C;  $^1\text{H}$  NMR (400 MHz,  $\text{CDCl}_3$  +  $\text{DMSO-}d_6$ ):  $\delta$  10.62 (1H, s), 7.76 (1H, d,  $J = 4.9$  Hz), 7.65 (2H, d,  $J = 4.4$  Hz), 7.47 (3H, d,  $J = 7.6$  Hz), 7.18 (1H, s), 6.7-6.66 (2H, m), 6.58 (1H, d,  $J = 7.3$  Hz), 3.94-3.88 (2H, m), 3.30 (2H, q,  $J = 13.3$ , 6.8 Hz), 1.18 (3H, s), 0.87 (3H, t,  $J = 5.4$  Hz);  $^{13}\text{C}$  NMR (100 MHz,  $\text{CDCl}_3$  +  $\text{DMSO-}d_6$ ):  $\delta$  175.82, 162.31, 161.88, 154.53, 144.36, 132.30, 130.38, 128.45, 128.25, 127.27, 126.69, 116.78, 113.17, 112.88, 107.07, 77.66, 59.03, 38.04, 12.93, 12.89; FT-IR (KBr):  $\nu$  3276, 2928, 2856, 1754, 1695, 1624, 1524, 1491, 1102, 753  $\text{cm}^{-1}$ ; ESI-MS:  $m/z$  392  $[\text{M}+\text{H}]^+$ ; ESI-HRMS: calcd for  $\text{C}_{22}\text{H}_{22}\text{N}_3\text{O}_4$   $[\text{M}+\text{H}]^+$  392.16048; found: 392.15959.

**Ethyl 3'-cyclopropyl-2,4'-dioxo-5-phenyl-1,2,3',4'-tetrahydro-1'H-spiro[pyrrole-3,2'-quinazoline]-4-carboxylate (3l)**

Yellow solid; (yield: 82%), m.p.: 189-191 °C;  $^1\text{H}$  NMR (400 MHz,  $\text{CDCl}_3$  +  $\text{DMSO-}d_6$ ):  $\delta$  10.58 (1H, s), 7.76 (1H, s), 7.65-7.63 (2H, m), 7.50-7.48 (3H, m), 7.18 (1H, d,  $J = 3.7$  Hz), 6.68 (1H, d,  $J = 4.2$  Hz), 6.60 (2H, s), 3.97 (2H, q,  $J = 13.7$ , 6.9 Hz), 2.48-2.48 (1H, m), 0.93 (3H, t,  $J = 6.6$  Hz), 0.91 (2H, d,  $J = 6.4$  Hz), 0.81 (1H, d,  $J = 3.8$  Hz), 0.67 (1H, s);  $^{13}\text{C}$  NMR (100 MHz,  $\text{CDCl}_3$  +  $\text{DMSO-}d_6$ ):  $\delta$  176.40, 164.14, 161.87, 154.16, 144.21, 135.25, 130.14, 128.69, 128.09, 127.19, 126.78, 116.68, 113.68, 112.80, 107.60, 77.88, 58.97, 25.38, 12.93, 6.61, 5.05; FT-IR (KBr):  $\nu$  3275, 3018, 2928, 2856, 1752, 1691, 1637, 1515, 1449, 1350, 1104, 756  $\text{cm}^{-1}$ ; ESI-MS:  $m/z$  404  $[\text{M}+\text{H}]^+$ ; ESI-HRMS: calcd for  $\text{C}_{23}\text{H}_{22}\text{N}_3\text{O}_4$   $[\text{M}+\text{H}]^+$  404.16048; found: 404.15963.

**Ethyl 6'-chloro-2,4'-dioxo-3',5-diphenyl-1,2,3',4'-tetrahydro-1'H-spiro[pyrrole-3,2'-quinazoline]-4-carboxylate (3m)**

Pale orange solid; (yield: 85%), m.p.: 242-244 °C;  $^1\text{H}$  NMR (400 MHz,  $\text{CDCl}_3$  +  $\text{DMSO-}d_6$ ):  $\delta$  10.55 (1H, s), 7.89 (1H, s), 7.55-7.42 (6H, m), 7.38-7.34 (5H, m), 7.19 (1H, s), 6.82 (1H, t,  $J = 10.3$  Hz), 4.16 (2H, q,  $J = 14.2$ , 7.5 Hz), 1.10 (3H, t,  $J = 6.7$  Hz);  $^{13}\text{C}$  NMR (100 MHz,  $\text{CDCl}_3$  +  $\text{DMSO-}d_6$ ):  $\delta$  175.32, 161.68, 161.56, 154.98, 143.57, 136.52, 132.42, 130.01, 128.56, 128.34,

128.02, 127.65, 127.02, 126.37, 121.29, 115.05, 114.15, 106.17, 78.08, 58.90, 12.98; FT-IR (KBr):  $\nu$  3277, 2928, 2856, 1751, 1643, 1492, 1450, 1106, 757  $\text{cm}^{-1}$ ; ESI-MS:  $m/z$  474  $[\text{M}+\text{H}]^+$ ; ESI-HRMS: calcd for  $\text{C}_{26}\text{H}_{21}\text{ClN}_3\text{O}_4$   $[\text{M}+\text{H}]^+$  474.12151; found: 474.12052.

**Ethyl 3'-benzyl-6'-chloro-2,4'-dioxo-5-phenyl-1,2,3',4'-tetrahydro-1'H-spiro[pyrrole-3,2'-quinazoline]-4-carboxylate (3n)**

Orange solid; (yield: 80%), m.p.: 268-270 °C;  $^1\text{H}$  NMR (500 MHz,  $\text{CDCl}_3$ ):  $\delta$  7.93 (1H, d,  $J = 2.5$  Hz), 7.73 (1H, s), 7.43 (1H, t,  $J = 6.8$  Hz), 7.35 (3H, t,  $J = 7.7$  Hz), 7.30 (2H, d,  $J = 7.0$  Hz), 7.18 (1H, s), 7.17 (1H, d,  $J = 2.4$  Hz), 7.16 (1H, d,  $J = 2.5$  Hz), 7.13-7.10 (3H, m), 6.54 (1H, d,  $J = 8.5$  Hz), 4.92 (1H, d,  $J = 15.5$  Hz), 4.41 (1H, d,  $J = 15.5$  Hz), 3.88 (2H, q,  $J = 7.1$  Hz), 0.95 (3H, t  $J = 7.2$  Hz);  $^{13}\text{C}$  NMR (125 MHz,  $\text{CDCl}_3$ ):  $\delta$  174.66, 163.07, 162.38, 155.24, 141.88, 136.90, 133.19, 131.71, 128.62, 128.40, 128.30, 128.20, 127.93, 127.52, 125.78, 118.70, 117.82, 105.43, 60.48, 46.70, 13.84; FT-IR (KBr):  $\nu$  3281, 3022, 2929, 1747, 1693, 1620, 1530, 1248, 1216, 1096, 754  $\text{cm}^{-1}$ ; ESI-MS:  $m/z$  488  $[\text{M}+\text{H}]^+$ ; ESI-HRMS: calcd for  $\text{C}_{27}\text{H}_{23}\text{ClN}_3\text{O}_4$   $[\text{M}+\text{H}]^+$  488.13716; found: 488.13561.

**Ethyl 6'-chloro-3'-(4-methoxybenzyl)-2,4'-dioxo-5-phenyl-1,2,3',4'-tetrahydro-1'H-spiro[pyrrole-3,2'-quinazoline]-4-carboxylate (3o)**

Orange solid; (yield: 82%), m.p.: 262-264 °C;  $^1\text{H}$  NMR (400 MHz,  $\text{CDCl}_3$  +  $\text{DMSO-}d_6$ ):  $\delta$  10.28 (1H, s), 7.85 (1H, d,  $J = 1.8$  Hz), 7.50-7.41 (6H, m), 7.24 (2H, d,  $J = 8.4$  Hz), 7.15 (1H, d,  $J = 6.5$  Hz), 6.71 (2H, d,  $J = 8.5$  Hz), 6.54 (1H, s), 4.85 (1H, d,  $J = 15.0$  Hz), 4.49 (1H, d,  $J = 15.1$  Hz), 3.92 (2H, q,  $J = 5.3, 1.6$  Hz), 3.73 (3H, s), 0.97 (3H, t,  $J = 7.0$  Hz);  $^{13}\text{C}$  NMR (100 MHz,  $\text{CDCl}_3$  +  $\text{DMSO-}d_6$ ):  $\delta$  175.64, 162.82, 162.22, 158.65, 156.03, 143.49, 132.80, 131.07, 129.88, 129.21, 128.87, 127.74, 127.43, 126.73, 122.68, 115.85, 115.83, 113.30, 105.76, 77.13, 59.68, 55.06, 45.80, 13.70; FT-IR (KBr):  $\nu$  3210, 3017, 2924, 2853, 1750, 1619, 1511, 1245, 1096, 750  $\text{cm}^{-1}$ ; ESI-MS:  $m/z$  518  $[\text{M}+\text{H}]^+$ ; ESI-HRMS: calcd for  $\text{C}_{28}\text{H}_{25}\text{ClN}_3\text{O}_5$   $[\text{M}+\text{H}]^+$  518.14773; found: 518.14645.

**Ethyl 3'-butyl-6'-chloro-2,4'-dioxo-5-phenyl-1,2,3',4'-tetrahydro-1'H-spiro[pyrrole-3,2'-quinazoline]-4-carboxylate (3p)**

Yellow solid; (yield: 79%), m.p.: 216-218 °C;  $^1\text{H}$  NMR (400 MHz,  $\text{CDCl}_3$  +  $\text{DMSO-}d_6$ ):  $\delta$  10.65 (1H, s), 7.68 (3H, d,  $J = 38.1$  Hz), 7.48 (3H, d,  $J = 4.0$  Hz), 7.12 (1H, d,  $J = 2.2$  Hz), 6.84 (1H, s), 6.58-6.56 (1H, m), 3.98 (2H, q,  $J = 6.5, 4.2$  Hz), 1.58 (2H, s), 1.27 (4H, d,  $J = 4.8$  Hz), 0.95-0.88

(6H, m);  $^{13}\text{C}$  NMR (100 MHz,  $\text{CDCl}_3 + \text{DMSO-}d_6$ ):  $\delta$  175.61, 161.76, 161.45, 154.97, 143.05, 131.99, 130.49, 128.39, 128.20, 127.33, 126.20, 121.31, 114.54, 114.38, 106.56, 77.45, 59.10, 43.16, 29.48, 19.71, 13.08, 13.03; FT-IR (KBr):  $\nu$  3268, 2960, 2929, 2864, 1753, 1693, 1627, 1492, 1419, 1321, 1104, 1031, 757  $\text{cm}^{-1}$ ; ESI-MS:  $m/z$  454  $[\text{M}+\text{H}]^+$ ; ESI-HRMS: calcd for  $\text{C}_{24}\text{H}_{25}\text{ClN}_3\text{O}_4$   $[\text{M}+\text{H}]^+$  454.15281; found: 454.15181.

**Ethyl 5-(4-fluorophenyl)-2,4'-dioxo-3'-phenyl-1,2,3',4'-tetrahydro-1'H-spiro[pyrrole-3,2'-quinazoline]-4-carboxylate (3q)**

Pale brown solid; (yield: 73%), m.p.: 226-228 °C;  $^1\text{H}$  NMR (400 MHz,  $\text{CDCl}_3 + \text{DMSO-}d_6$ ):  $\delta$  10.47 (s, 1H), 7.76 (s, 1H), 7.42 (d,  $J = 5.7$  Hz, 1H), 7.36 (s, 2H), 7.25 (s, 5H), 7.07 (d,  $J = 7.5$  Hz, 3H), 6.69 (t,  $J = 6.2$  Hz, 2H), 3.97 (q,  $J = 5.9, 6.4$  Hz, 2H), 0.91 (t,  $J = 3.9$  Hz, 3H);  $^{13}\text{C}$  NMR (100 MHz,  $\text{CDCl}_3 + \text{DMSO-}d_6$ ):  $\delta$  175.16, 162.40, 161.99, 161.28, 159.53, 154.34, 144.75, 132.51, 130.46, 130.38, 129.71, 128.11, 127.37, 126.74, 126.64, 116.27, 114.54, 114.32, 112.87, 112.20, 106.04, 78.02, 58.51, 12.61; FT-IR (KBr):  $\nu$  3391, 1746, 1649, 1508, 1369, 1222, 1106, 995, 763  $\text{cm}^{-1}$ ; ESI-MS:  $m/z$  458  $[\text{M}+\text{H}]^+$ ; ESI-HRMS: calcd for  $\text{C}_{26}\text{H}_{21}\text{FN}_3\text{O}_4$   $[\text{M}+\text{H}]^+$  458.15106; found: 458.14863.

**Ethyl 2,4'-dioxo-3'-phenyl-5-(*p*-tolyl)-1,2,3',4'-tetrahydro-1'H-spiro[pyrrole-3,2'-quinazoline]-4-carboxylate (3r)**

Pale yellow solid; (yield: 85%), m.p.: 243-245 °C;  $^1\text{H}$  NMR (400 MHz,  $\text{CDCl}_3 + \text{DMSO-}d_6$ ):  $\delta$  10.50 (s, 1H), 7.71 (t,  $J = 7.1$  Hz, 1H), 7.41 (d,  $J = 7.1$  Hz, 1H), 7.35 (t,  $J = 7.2$  Hz, 2H), 7.28 (s, 1H), 7.22 (d,  $J = 7.1$  Hz, 3H), 7.15 (d,  $J = 7.9$  Hz, 2H), 7.08 (d,  $J = 7.9$  Hz, 2H), 6.66 (t,  $J = 11.5$ , Hz, 2H), 3.96 (q,  $J = 8.7, 7.0$  Hz, 2H), 2.33 (s, 3H), 0.90 (t,  $J = 7.0$  Hz, 3H);  $^{13}\text{C}$  NMR (100 MHz,  $\text{CDCl}_3 + \text{DMSO-}d_6$ ):  $\delta$  176.05, 163.04, 162.08, 154.92, 145.63, 145.52, 137.49, 134.65, 133.09, 130.35, 128.96, 128.19, 127.46, 127.40, 116.98, 116.86, 113.54, 113.16, 107.12, 78.70, 59.17, 20.79, 13.41; FT-IR (KBr):  $\nu$  3401, 2991, 1747, 1649, 1519, 1450, 998, 756  $\text{cm}^{-1}$ ; ESI-MS:  $m/z$  454  $[\text{M}+\text{H}]^+$ ; ESI-HRMS: calcd for  $\text{C}_{27}\text{H}_{24}\text{N}_3\text{O}_4$   $[\text{M}+\text{H}]^+$  454.17613; found: 454.17561.

**Ethyl 5-(4-methoxyphenyl)-2,4'-dioxo-3'-phenyl-1,2,3',4'-tetrahydro-1'H-spiro[pyrrole-3,2'-quinazoline]-4-carboxylate (3s)**

White solid; (yield: 88%), m.p.: 272-274 °C;  $^1\text{H}$  NMR (400 MHz,  $\text{CDCl}_3 + \text{DMSO-}d_6$ ):  $\delta$  10.46 (s, 1H), 7.74 (d,  $J = 7.7$  Hz, 1H), 7.45-7.41 (m, 1H), 7.38-7.34 (m, 2H), 7.27-7.22 (m, 4H), 7.13 (d,  $J = 6.7$  Hz, 2H), 6.86 (d,  $J = 5.2$  Hz, 2H), 6.67 (t,  $J = 3.8$  Hz, 2H), 3.97 (q,  $J = 7.6, 2.6$  Hz,



2H), 3.78 (s, 3H), 0.91 (t,  $J = 4.0$  Hz, 3H);  $^{13}\text{C}$  NMR (100 MHz,  $\text{CDCl}_3 + \text{DMSO-}d_6$ ):  $\delta$  175.47, 162.74, 161.73, 158.21, 154.31, 144.83, 132.52, 129.87, 129.82, 129.62, 129.25, 128.77, 128.43, 127.68, 126.4, 116.67, 113.20, 113.05, 106.70, 78.35, 58.79, 54.50, 12.85; FT-IR (KBr):  $\nu$  3403, 1652, 1216, 988, 754  $\text{cm}^{-1}$ ; ESI-MS:  $m/z$  470  $[\text{M}+\text{H}]^+$ ; ESI-HRMS: calcd for  $\text{C}_{27}\text{H}_{24}\text{N}_3\text{O}_5$   $[\text{M}+\text{H}]^+$  470.17105; found: 470.17060.

**Ethyl 3'-butyl-2,4'-dioxo-5,6'-diphenyl-1,2,3',4'-tetrahydro-1'H-spiro[pyrrole-3,2'-quinazoline]-4-carboxylate (5)**

White solid; (yield: 82%), m.p.: 252-254  $^\circ\text{C}$ ;  $^1\text{H}$  NMR (400 MHz,  $\text{CDCl}_3$ ):  $\delta$  12.32 (1H, s), 8.55 (1H, d,  $J = 1.4$  Hz), 8.07 (1H, d,  $J = 6.5$  Hz), 7.96 (1H, d,  $J = 8.4$  Hz), 7.72 (2H, d,  $J = 7.4$  Hz), 7.51-7.40 (8H, m), 5.51 (1H, s), 4.47 (2H, t,  $J = 6.9$  Hz), 4.31 (2H, q,  $J = 7.1$  Hz), 1.74-1.68 (2H, m), 1.38-1.32 (5H, m), 0.92 (3H, t,  $J = 7.3$  Hz);  $^{13}\text{C}$  NMR (100 MHz,  $\text{CDCl}_3$ ):  $\delta$  167.81, 162.03, 159.04, 152.25, 146.36, 144.61, 141.60, 139.43, 135.46, 133.36, 129.84, 129.09, 128.75, 128.29, 128.19, 127.32, 127.12, 124.91, 122.23, 104.51, 60.56, 44.20, 31.87, 20.14, 14.38, 13.76; FT-IR (KBr):  $\nu$  3223, 3063, 2962, 1715, 1684, 1621, 1478, 1288, 1180, 769  $\text{cm}^{-1}$ ; ESI-MS:  $m/z$  496.  $[\text{M}+\text{H}]^+$ ; ESI-HRMS: calcd for  $\text{C}_{30}\text{H}_{30}\text{N}_3\text{O}_4$   $[\text{M}+\text{H}]^+$  496.22308; found: 496.22392.

**Ethyl 2-phenyl-1H-pyrrolo[2,3-b]quinoxaline-3-carboxylate (7)**

Pale brown; (yield: 88%), m.p.: 232-234  $^\circ\text{C}$ ;  $^1\text{H}$  NMR (400 MHz,  $\text{CDCl}_3$ ):  $\delta$  12.54 (1H, s), 8.21 (1H, d,  $J = 7.8$  Hz), 7.71 (2H, d,  $J = 7.1$  Hz), 7.55-7.49 (3H, m), 7.43 (2H, t,  $J = 7.5$  Hz), 7.32-7.28 (1H, m), 7.00 (1H, d,  $J = 7.9$  Hz), 4.28 (2H, q,  $J = 7.1$  Hz), 1.18 (3H, t,  $J = 7.1$  Hz);  $^{13}\text{C}$  NMR (100 MHz,  $\text{CDCl}_3$ ):  $\delta$  163.37, 154.75, 142.16, 142.07, 141.65, 138.20, 131.22, 130.54, 129.94, 129.88, 128.53, 128.41, 127.38, 126.99, 103.54, 60.49, 14.17; FT-IR (KBr):  $\nu$  3193, 3063, 2925, 1726, 1694, 1611, 1254, 760  $\text{cm}^{-1}$ ; ESI-MS:  $m/z$  318  $[\text{M}+\text{H}]^+$ ; ESI-HRMS: calcd for  $\text{C}_{19}\text{H}_{16}\text{N}_2\text{O}_3$   $[\text{M}+\text{H}]^+$  318.12370; found: 318.12292.

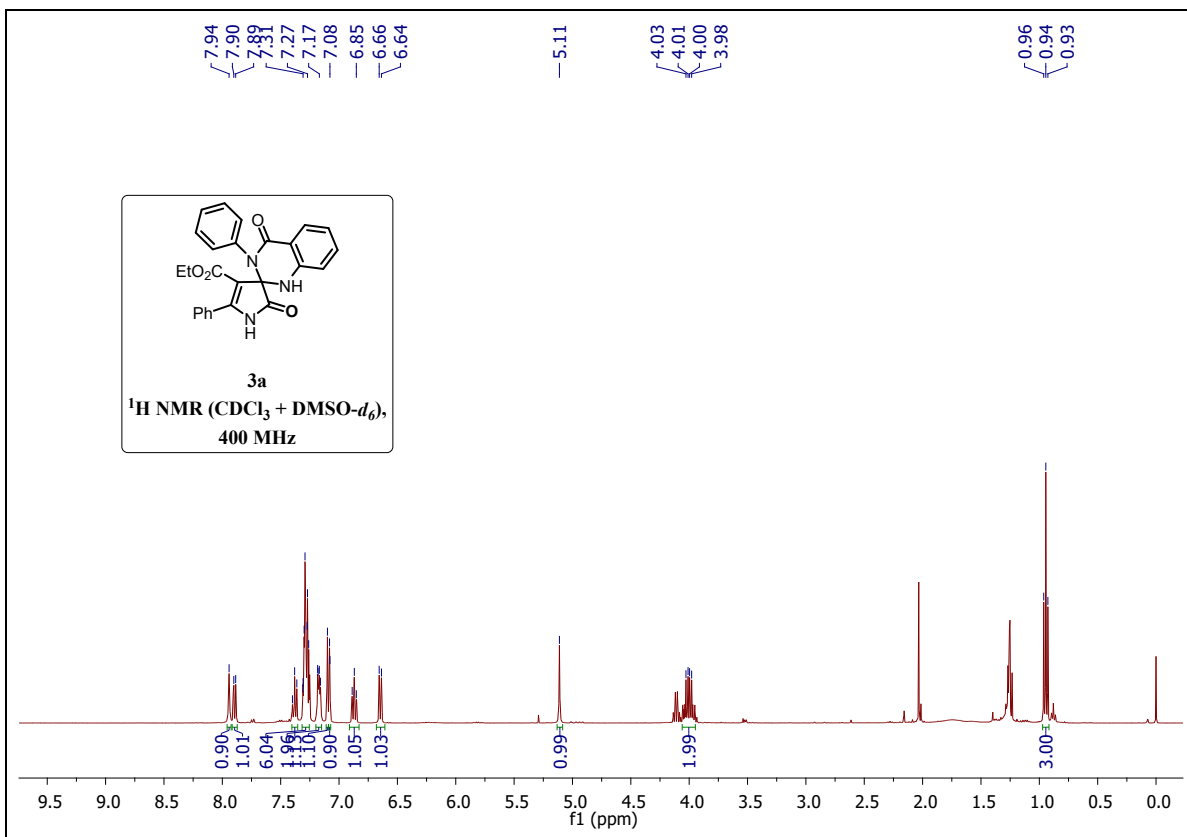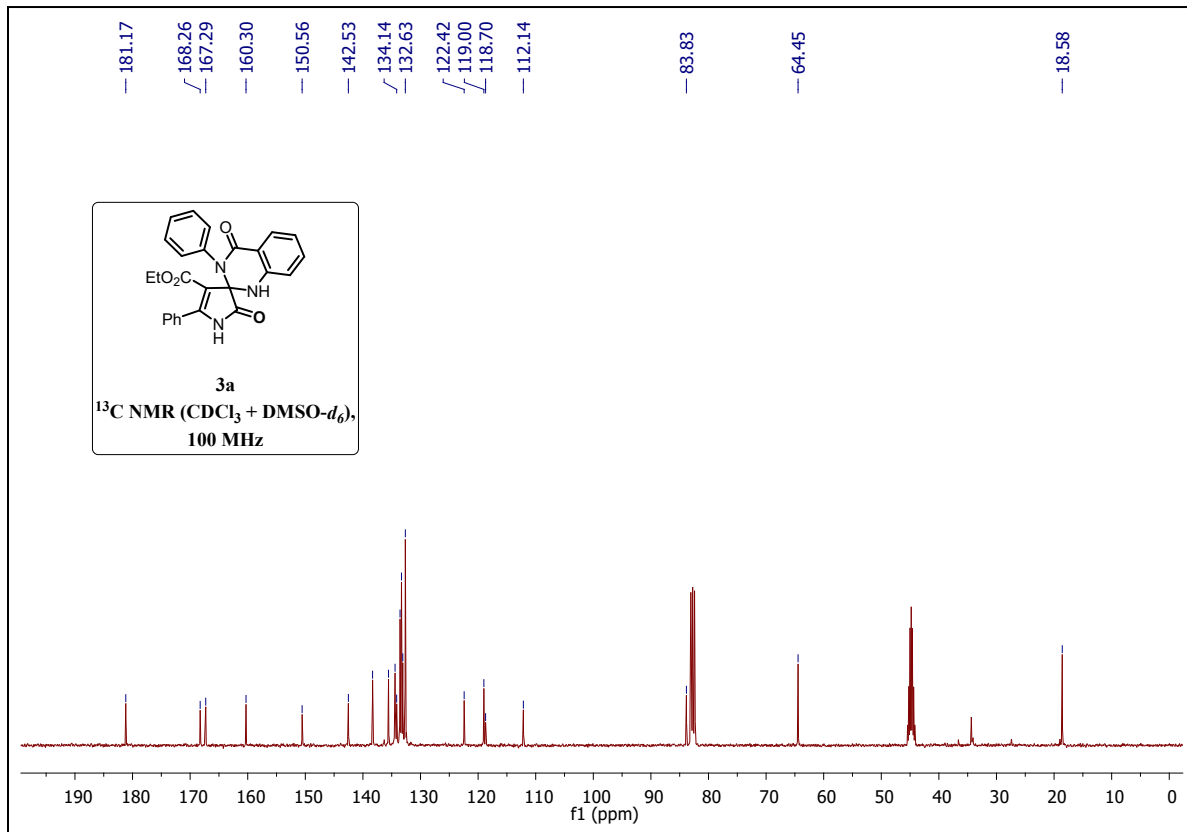

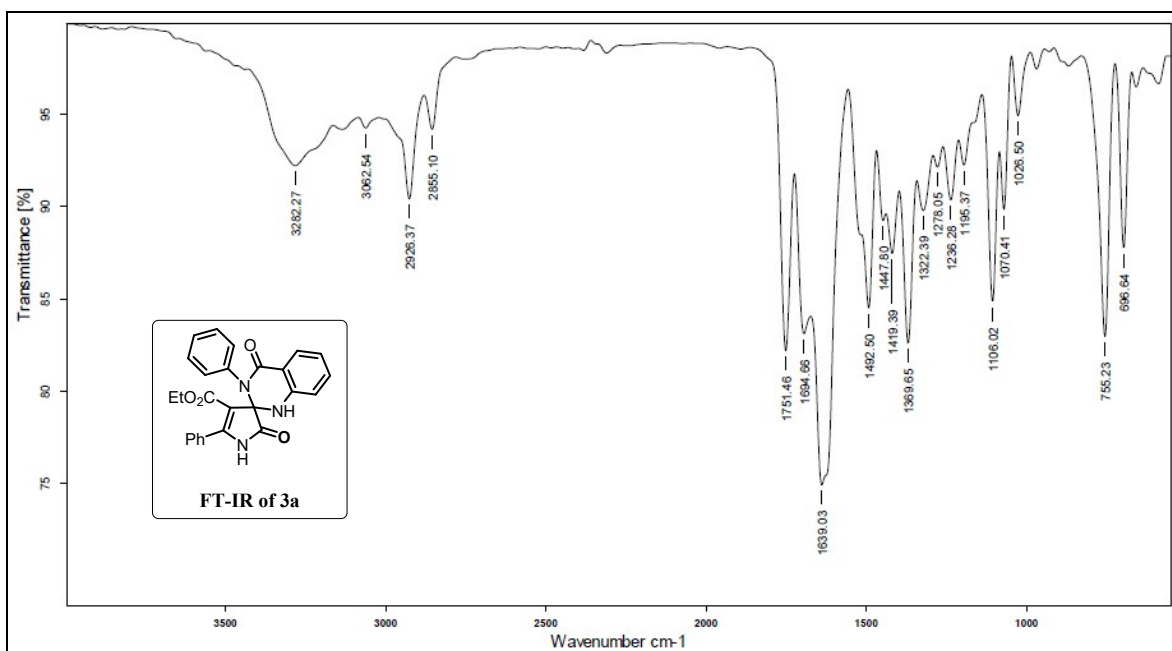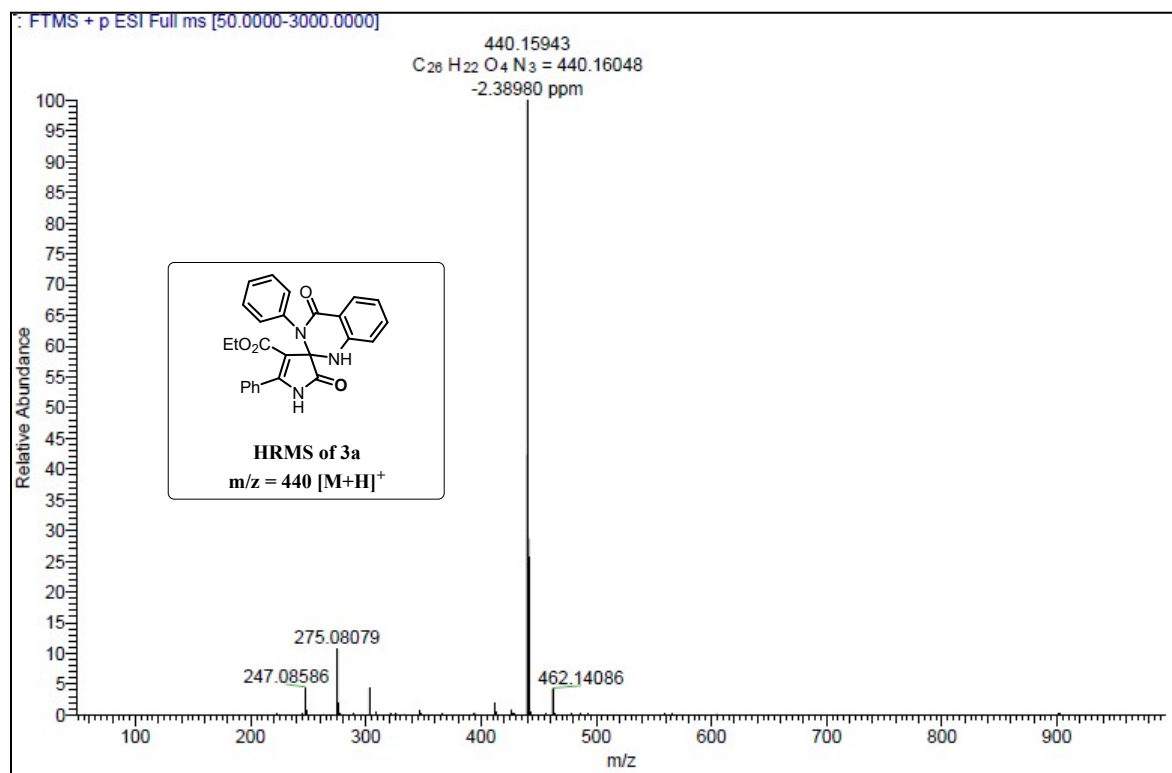

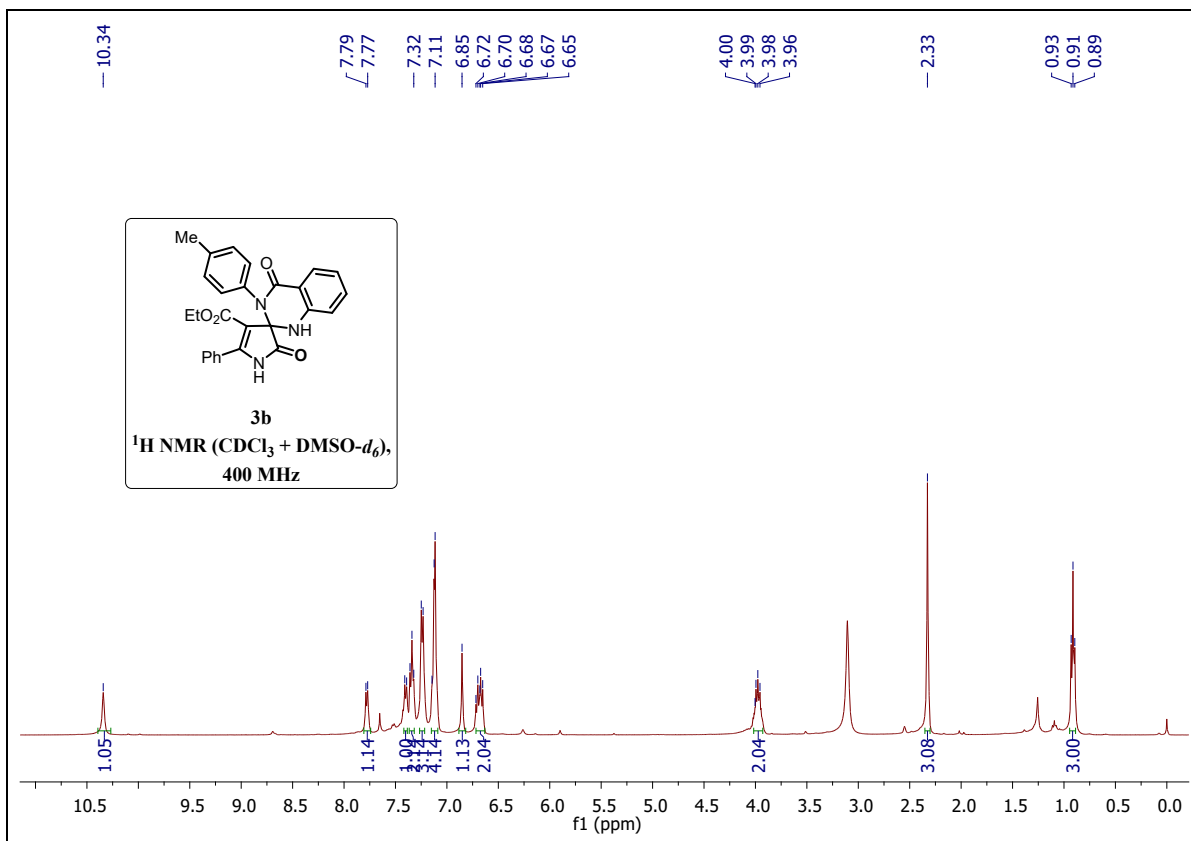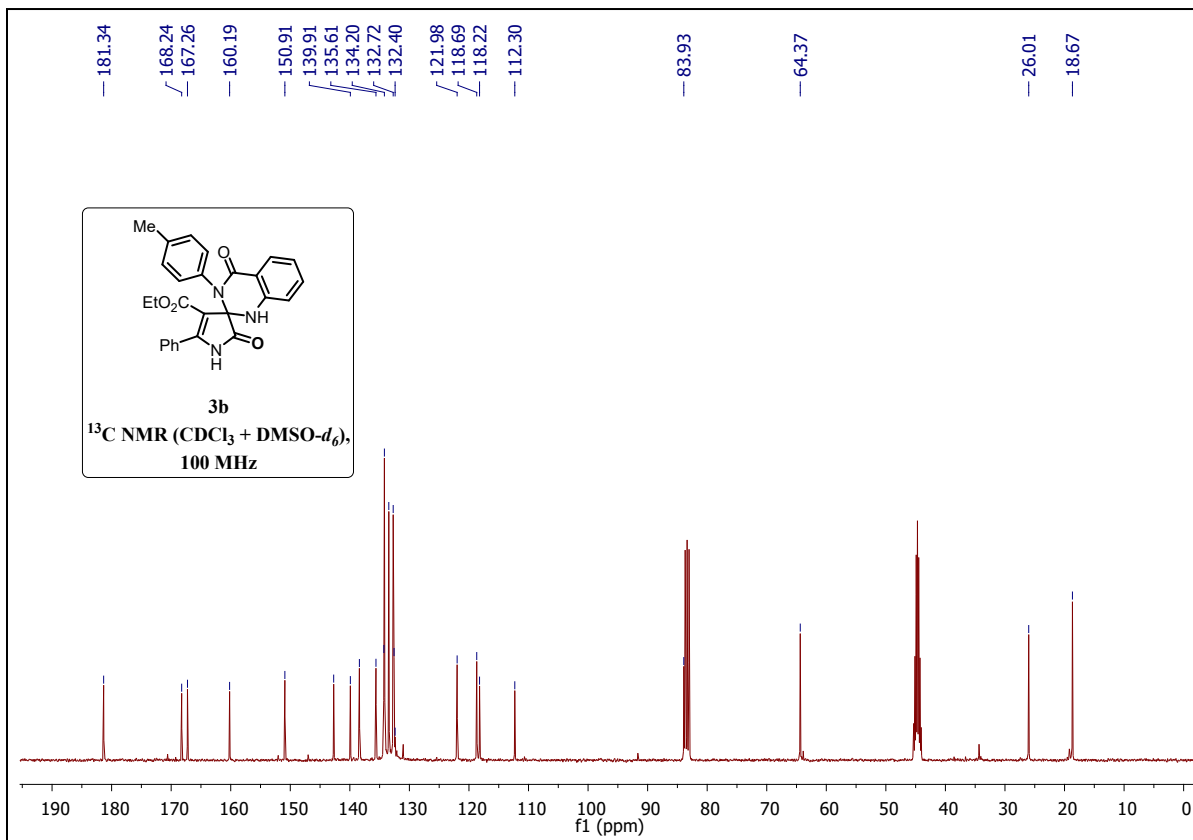

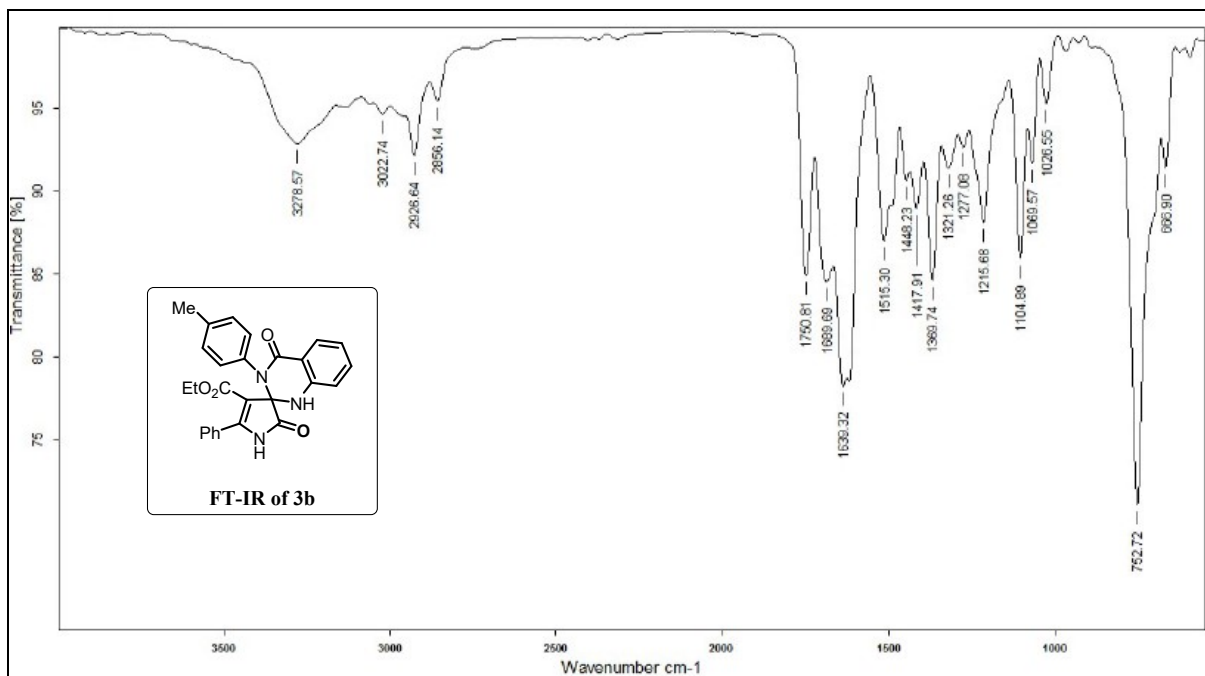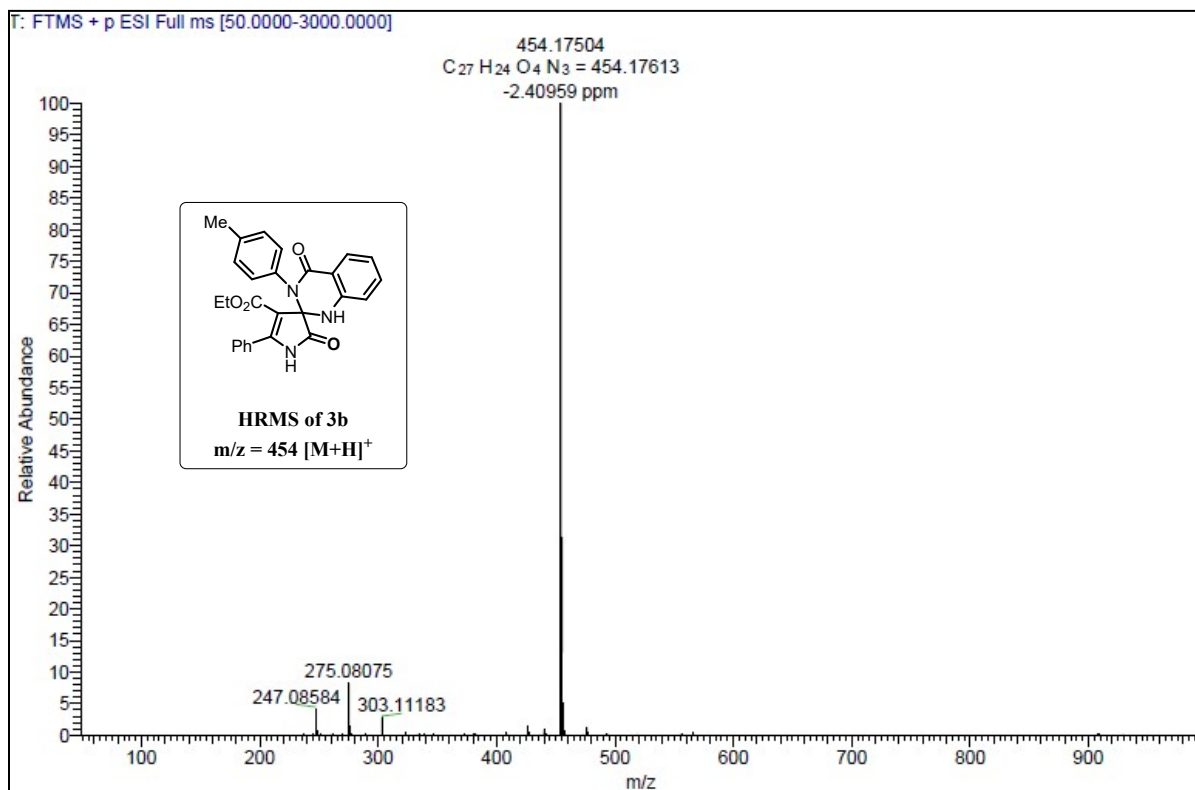

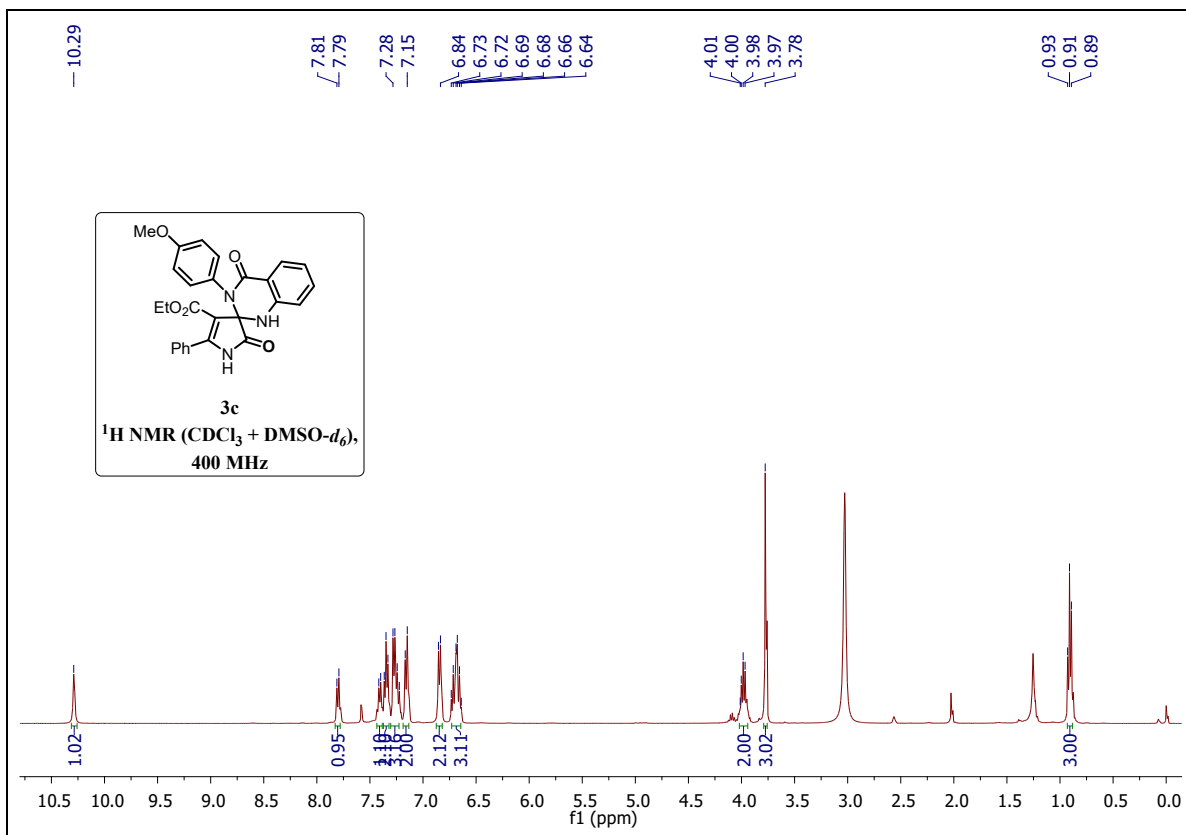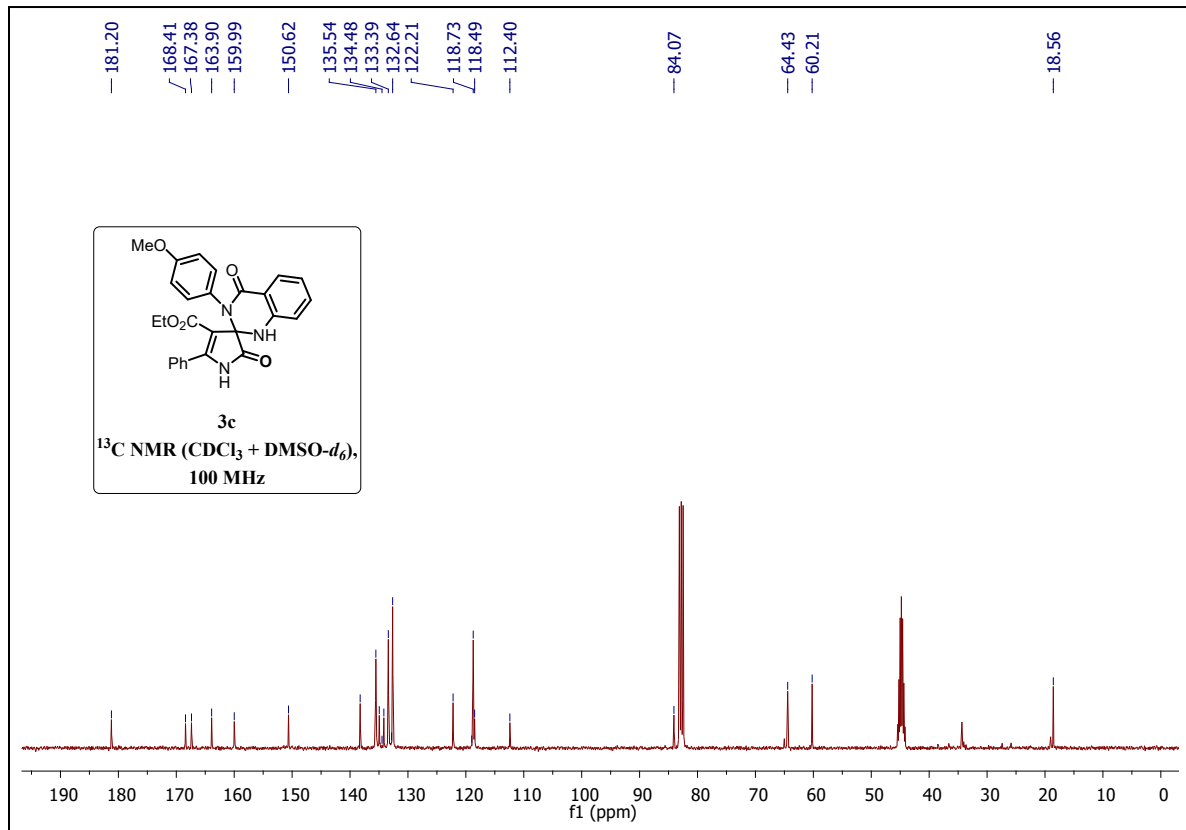

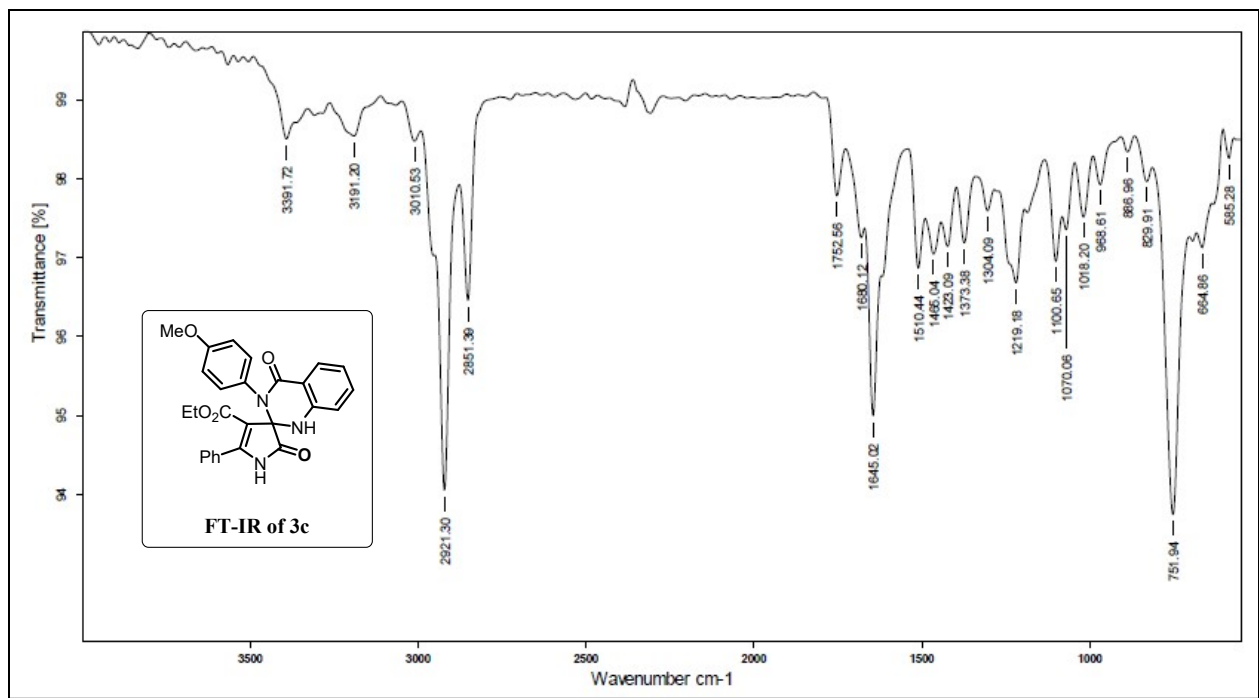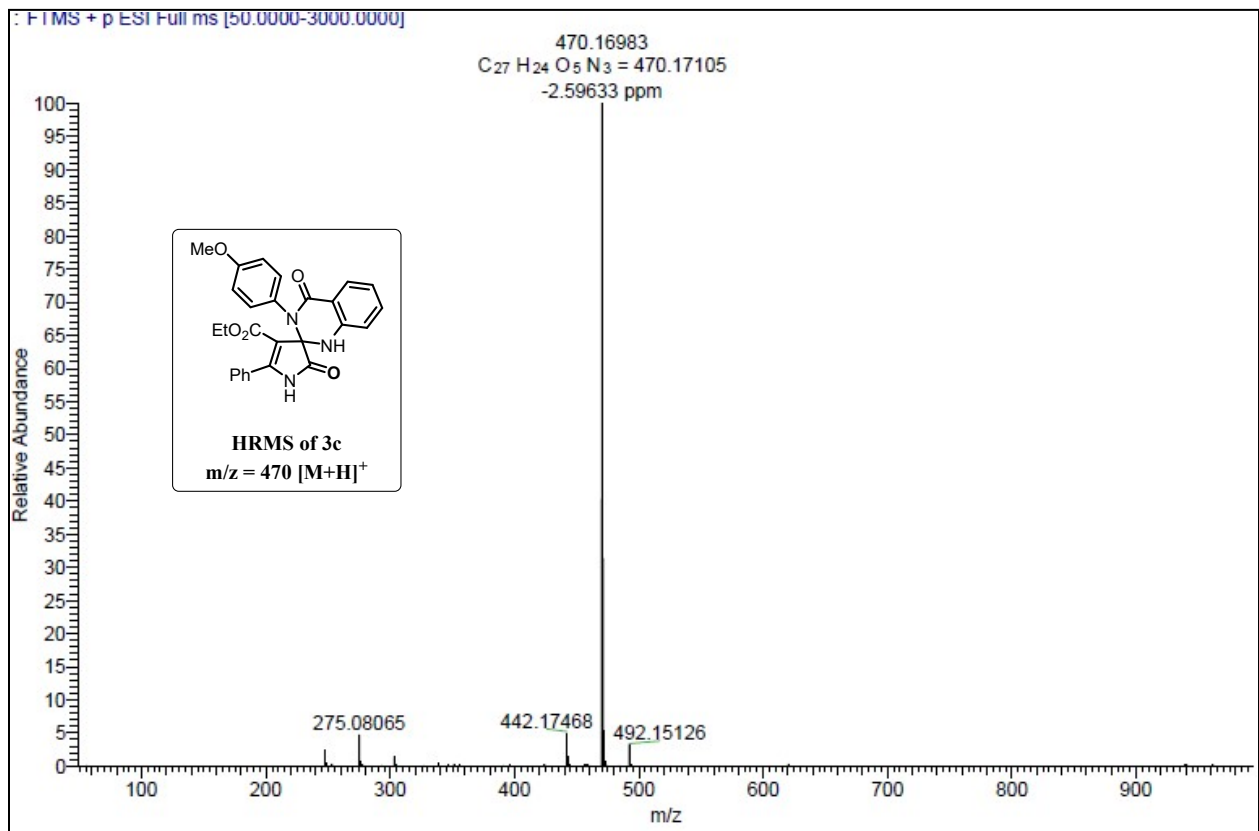

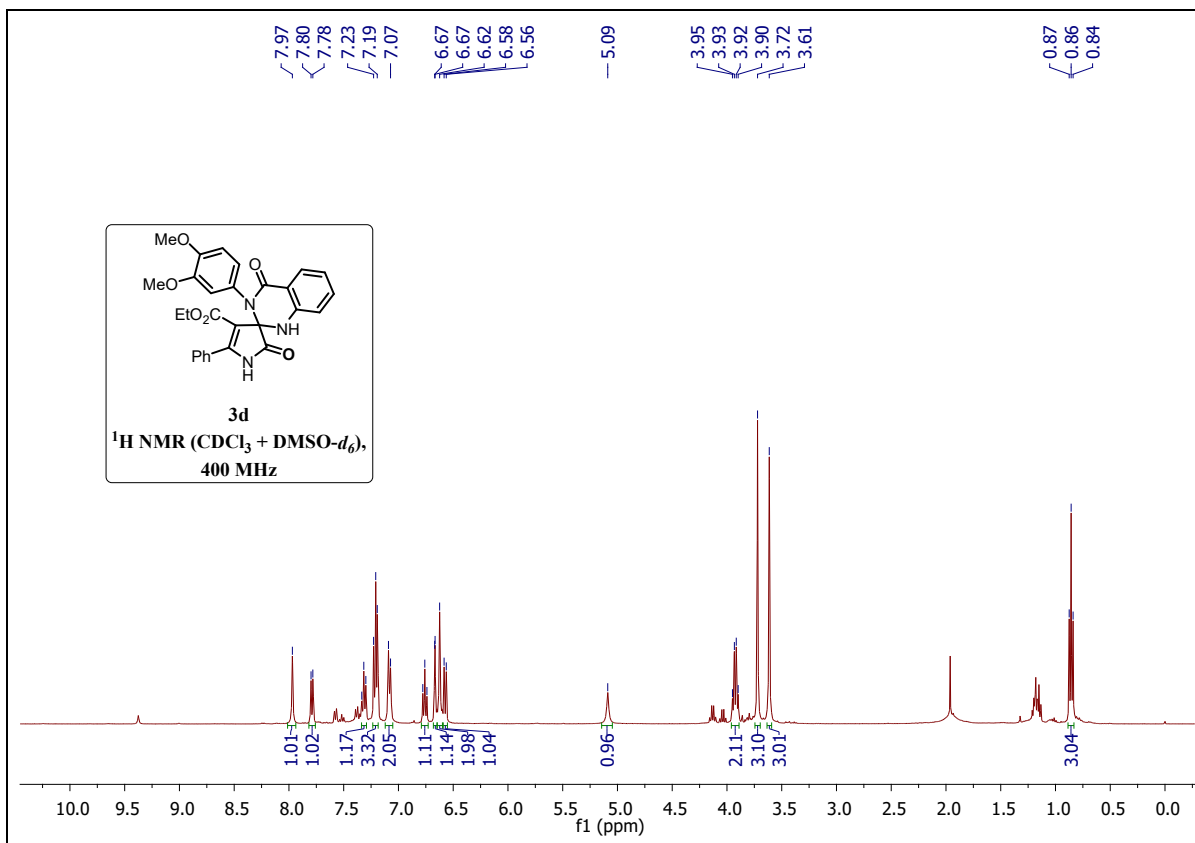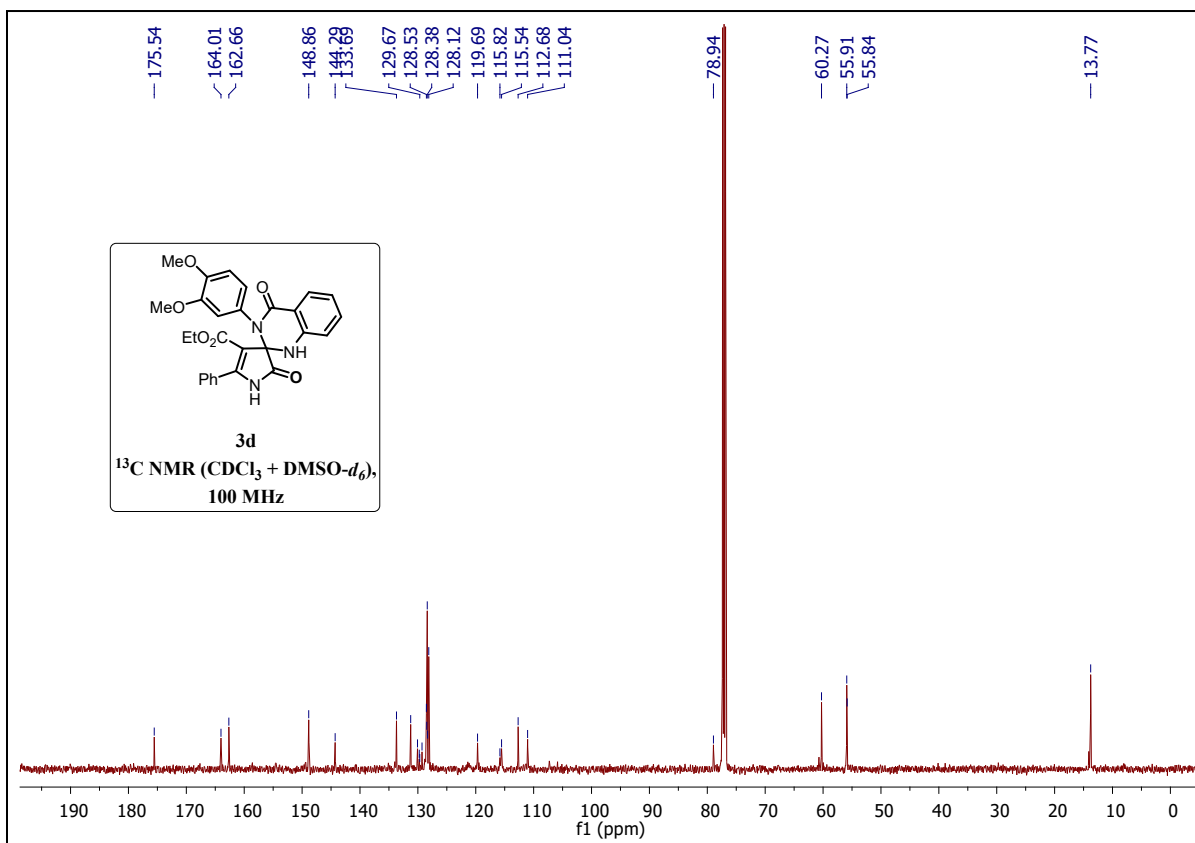



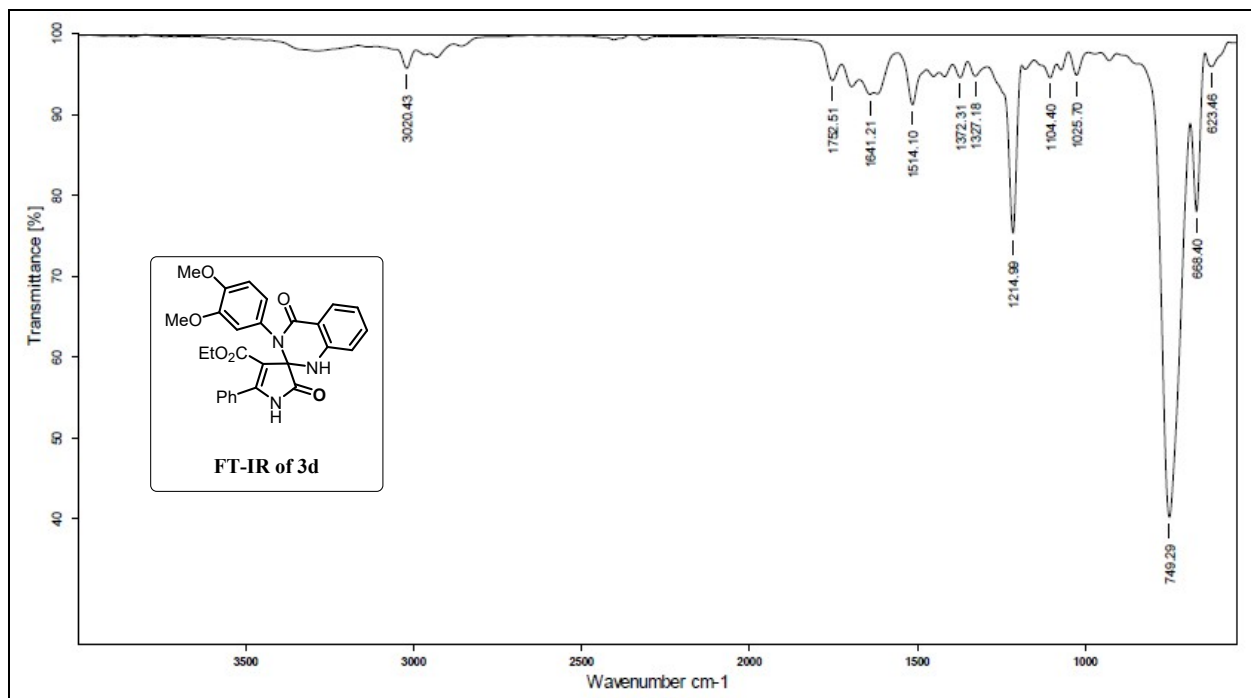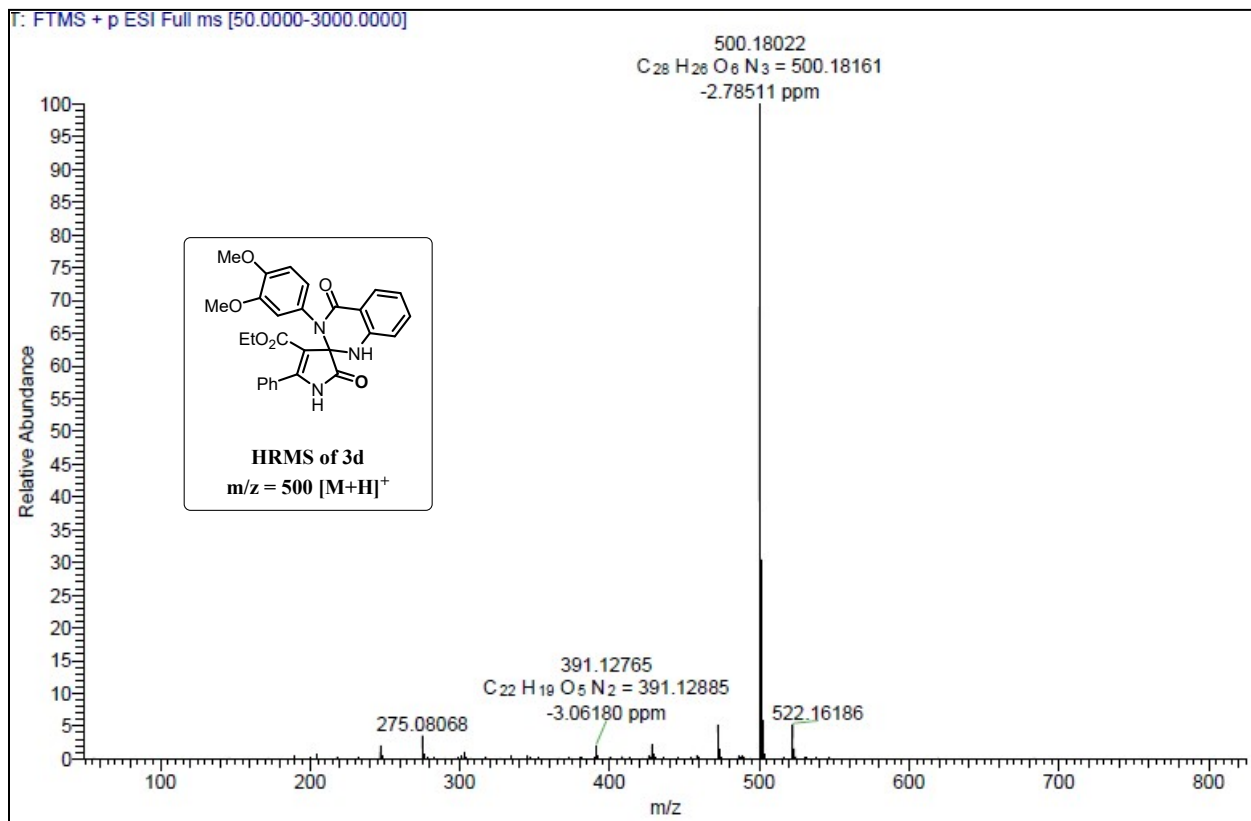

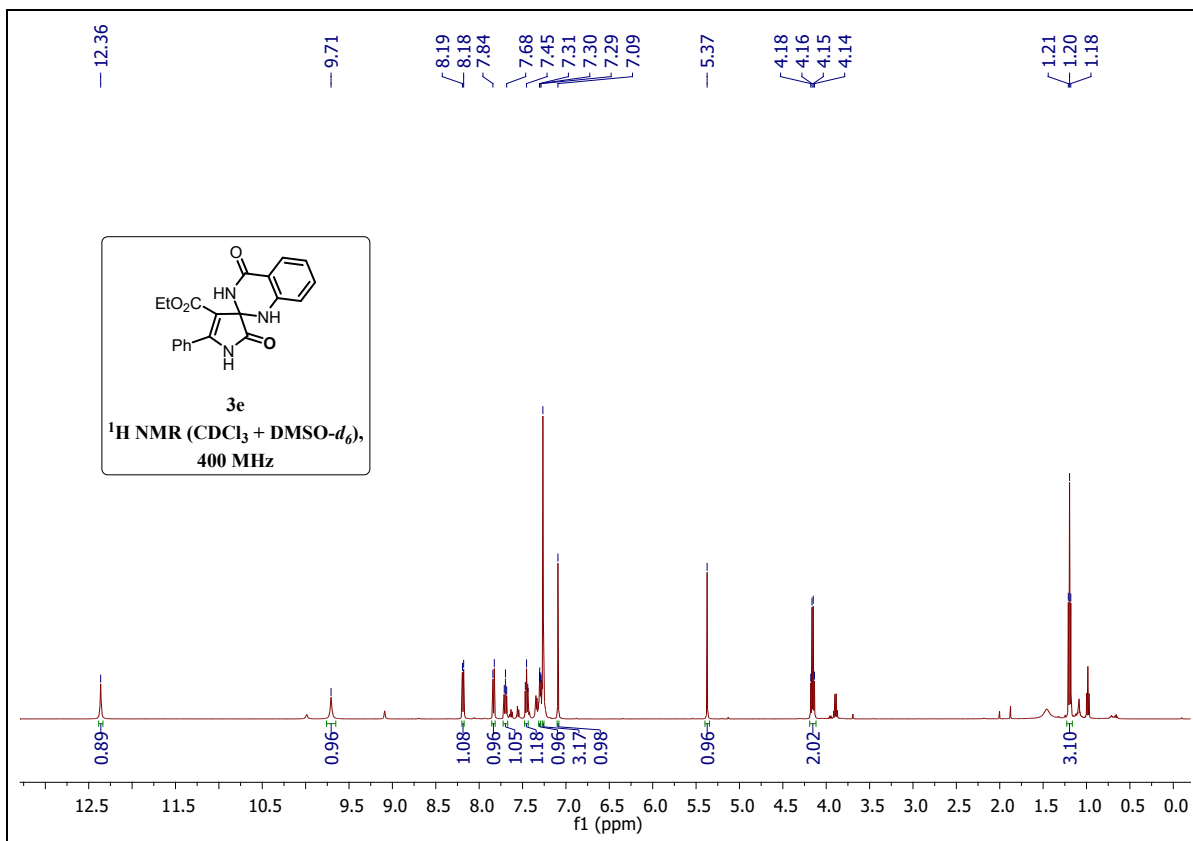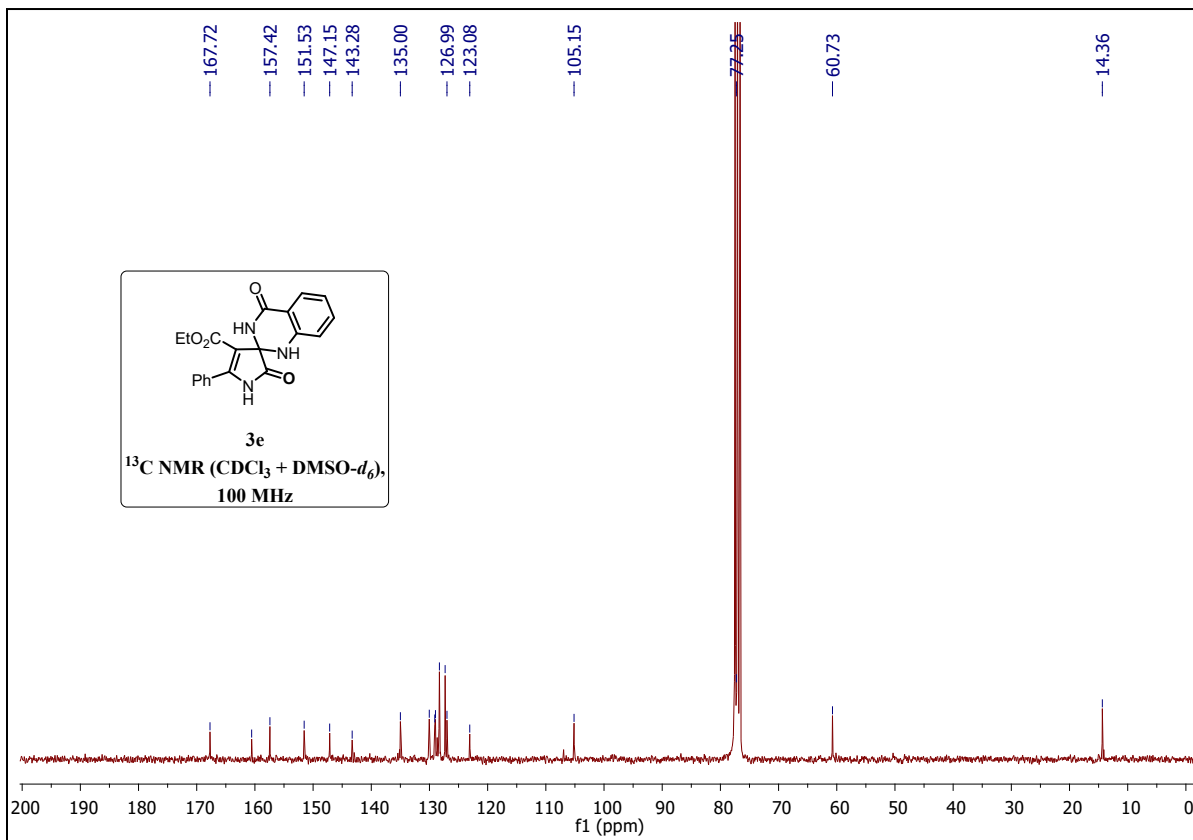

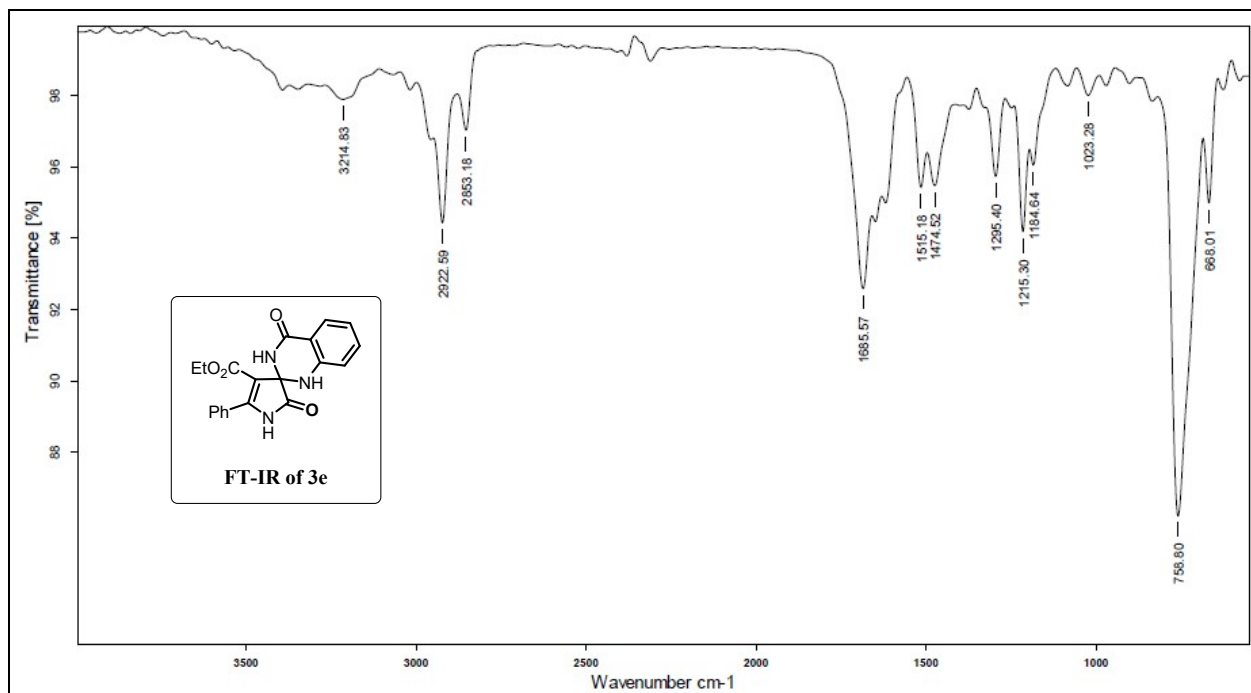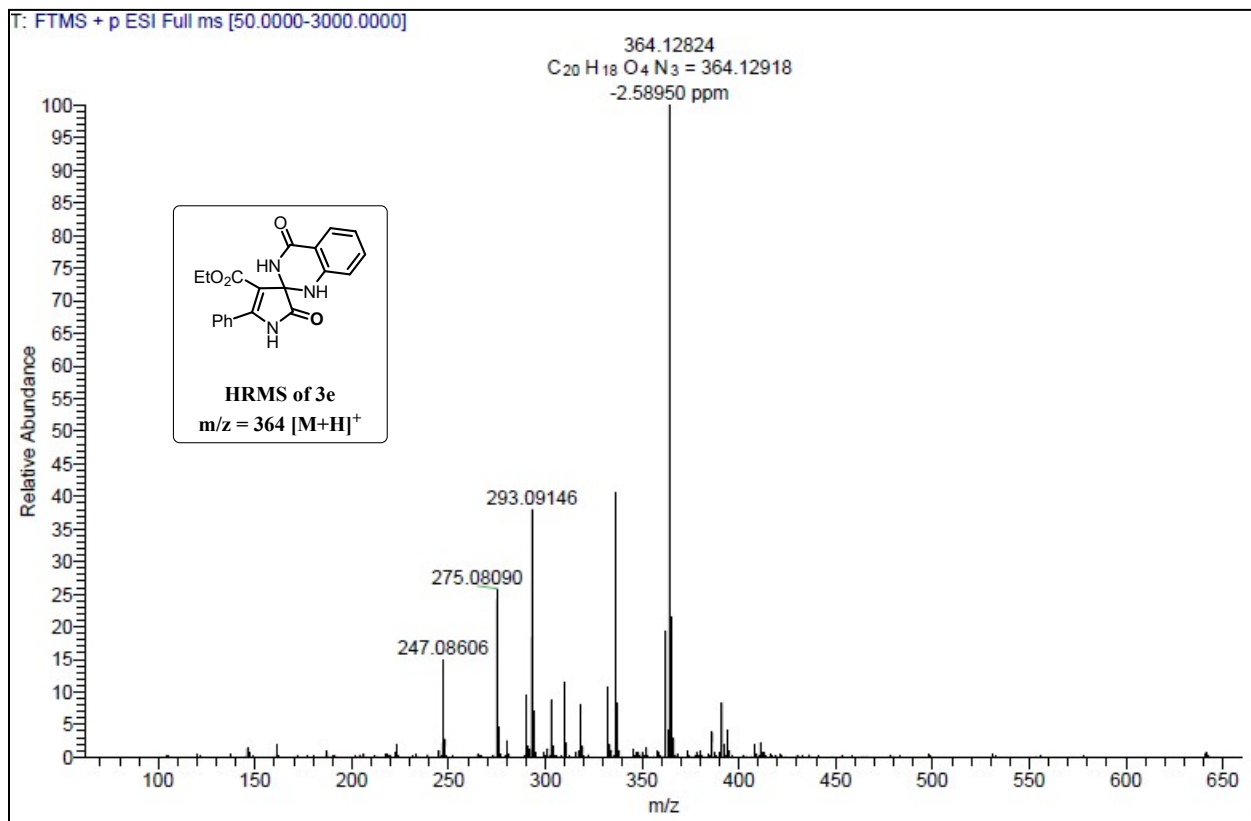

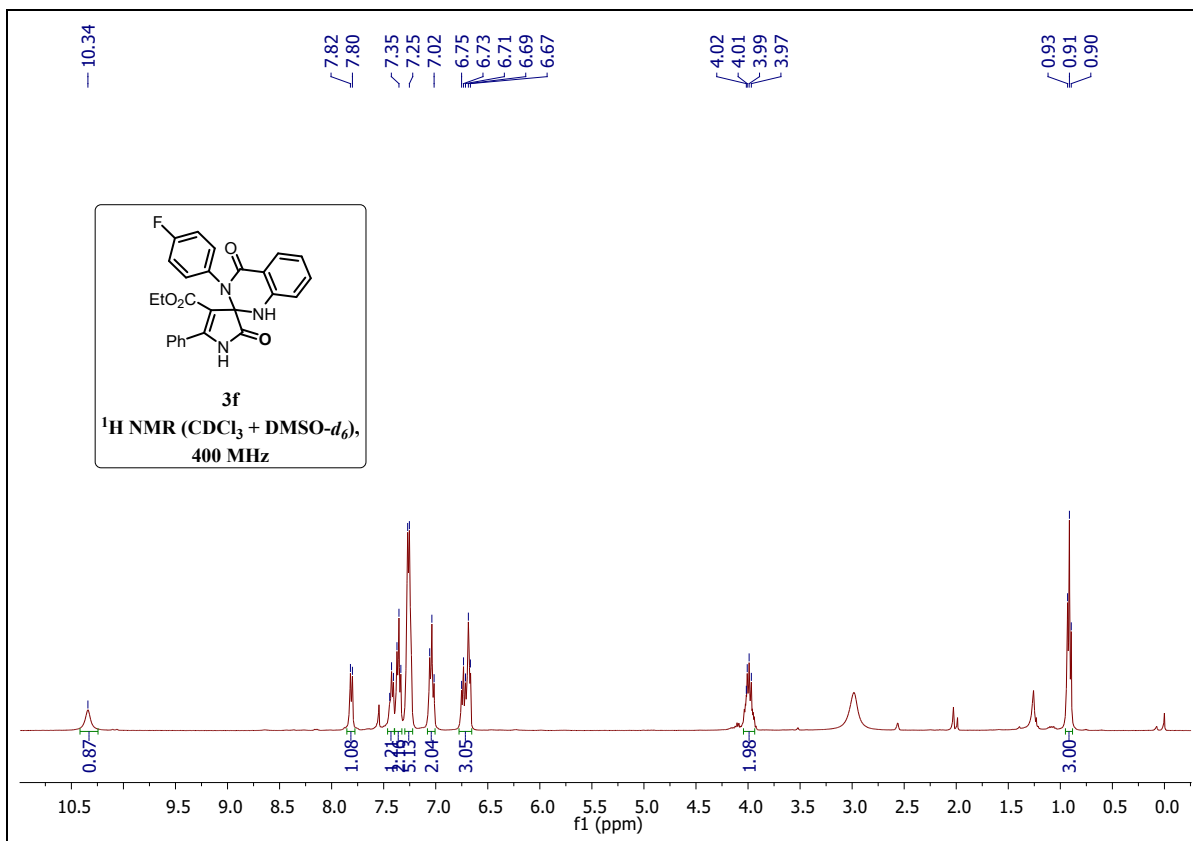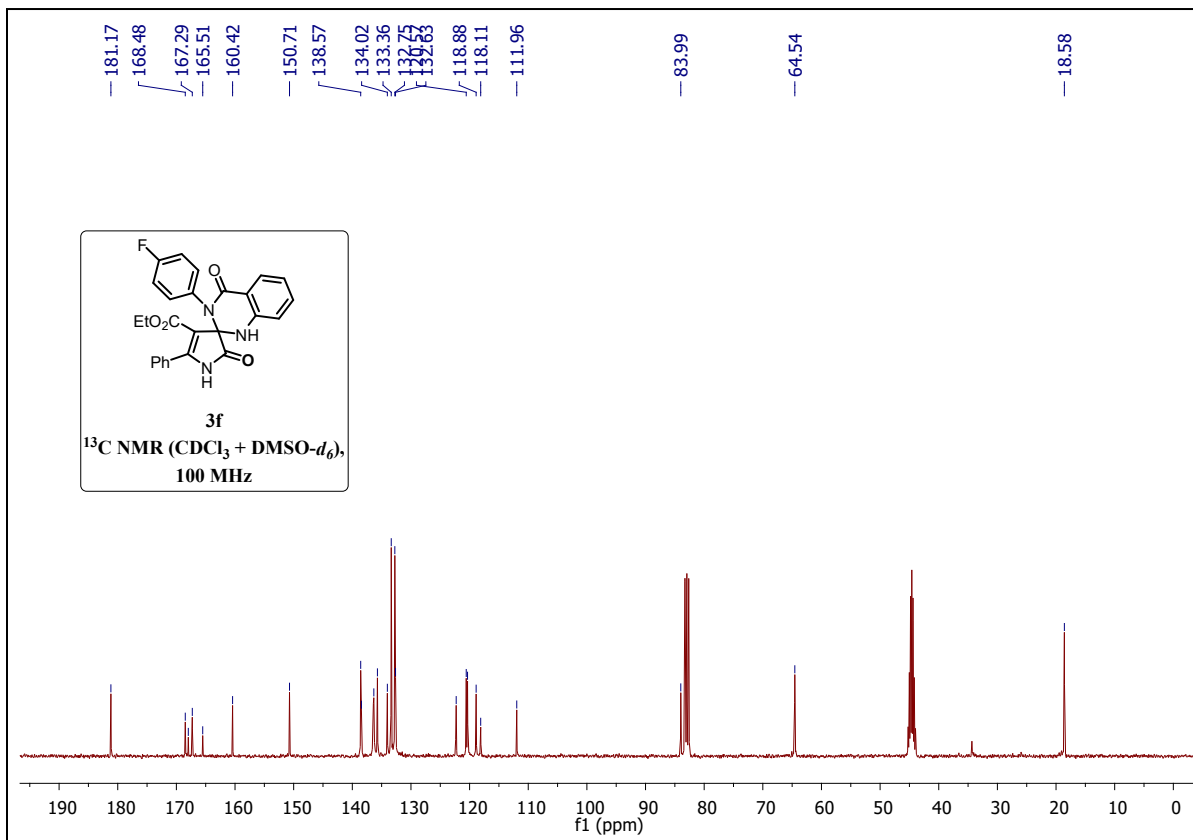

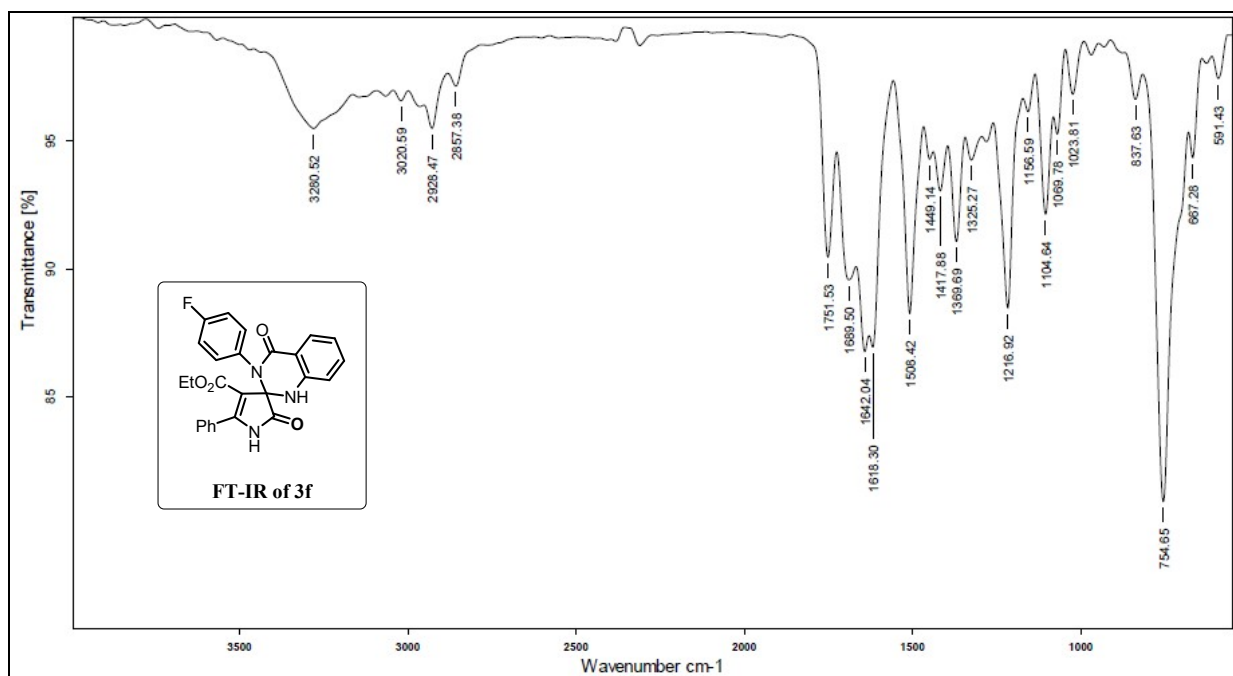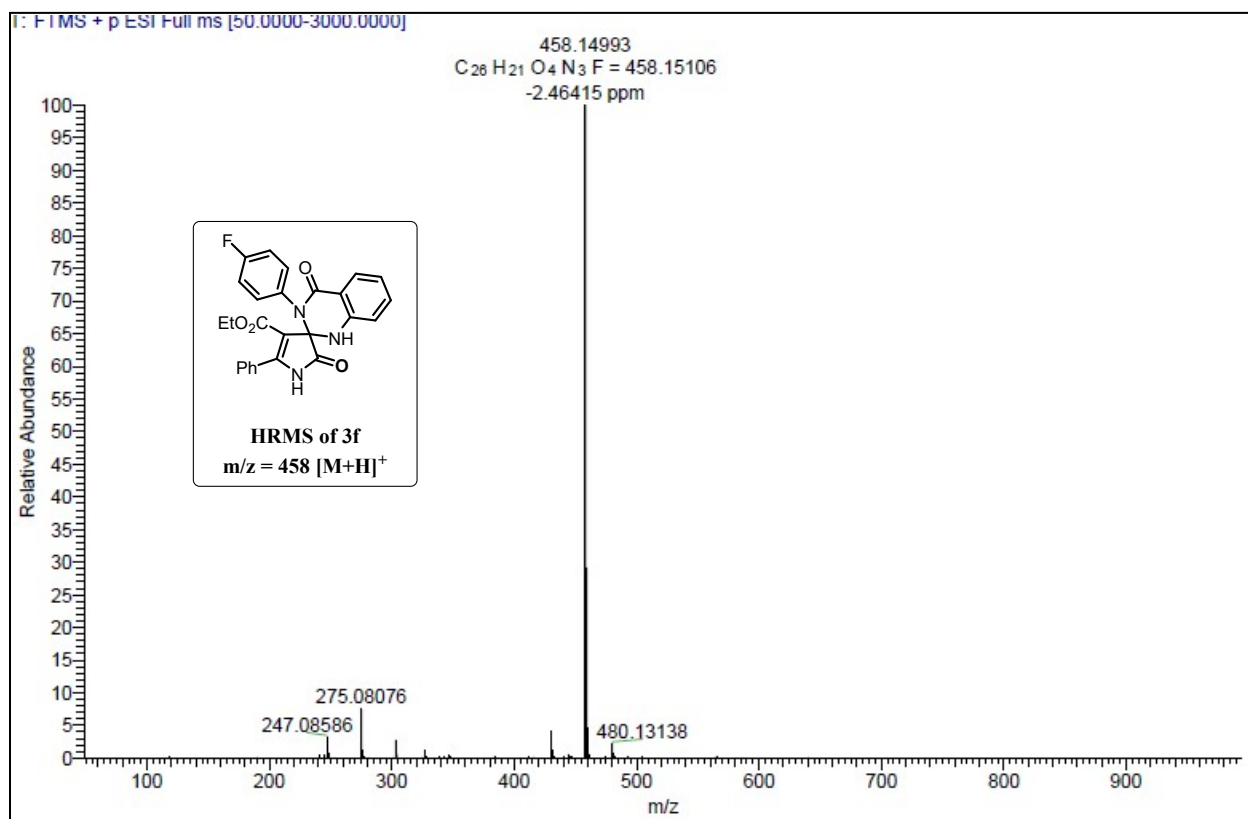

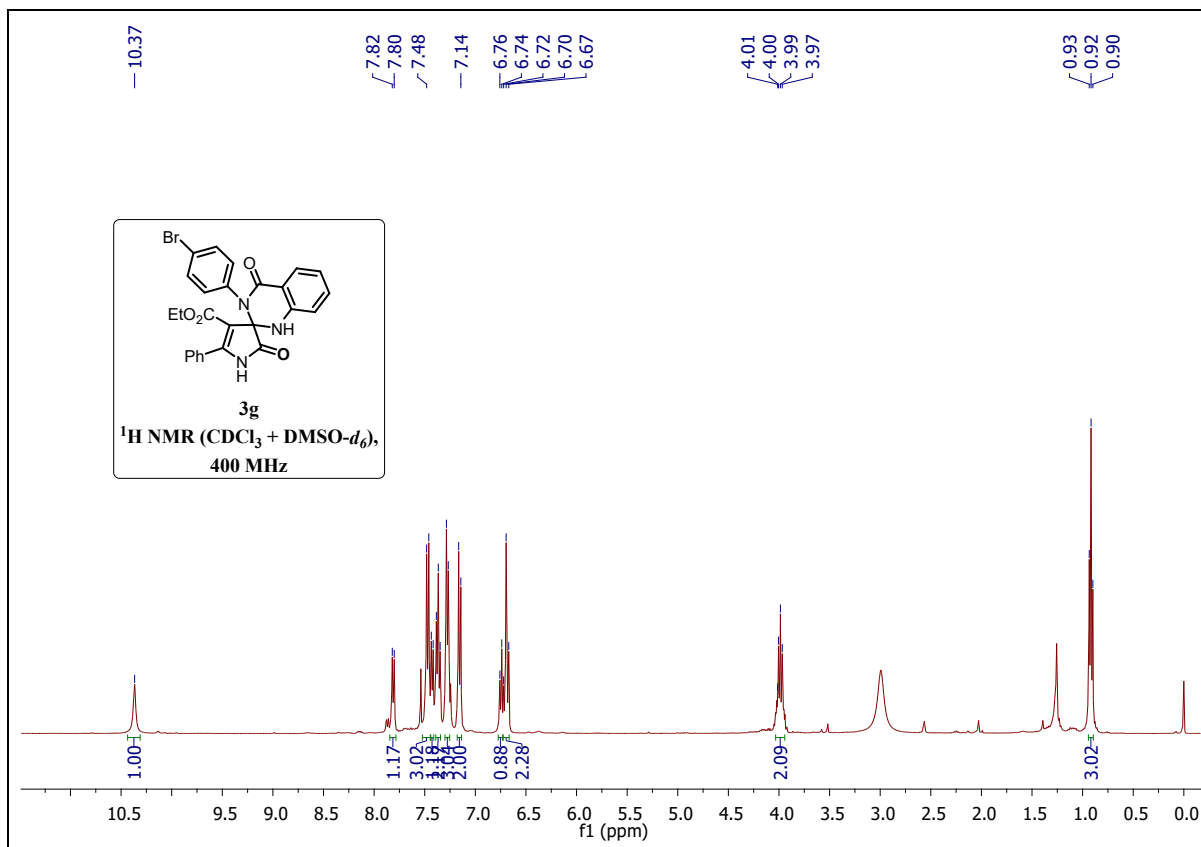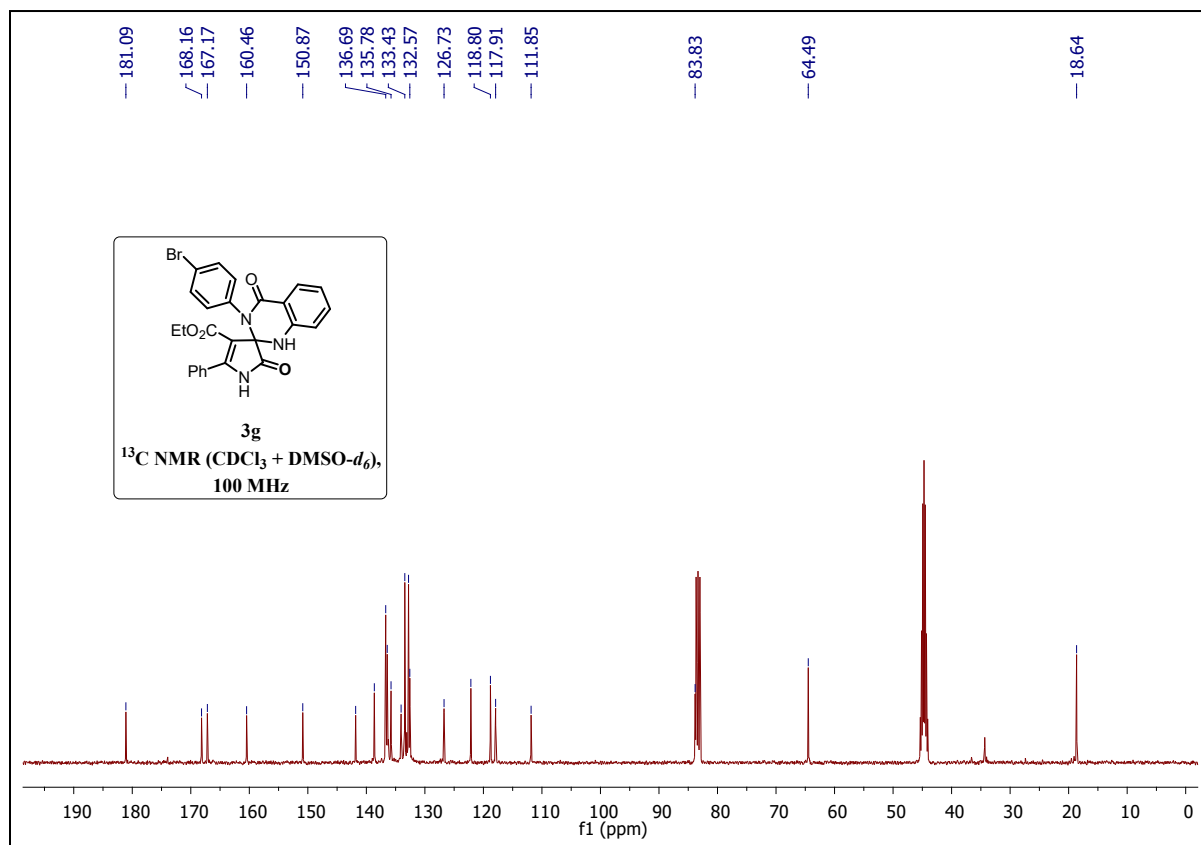

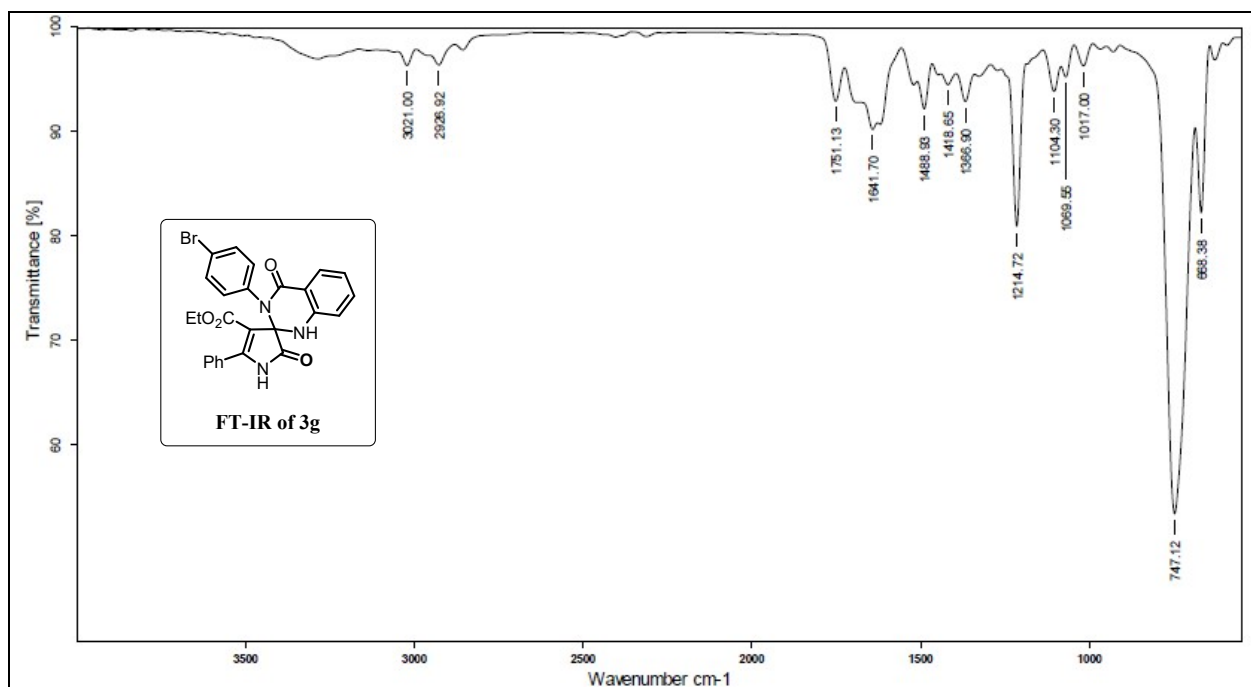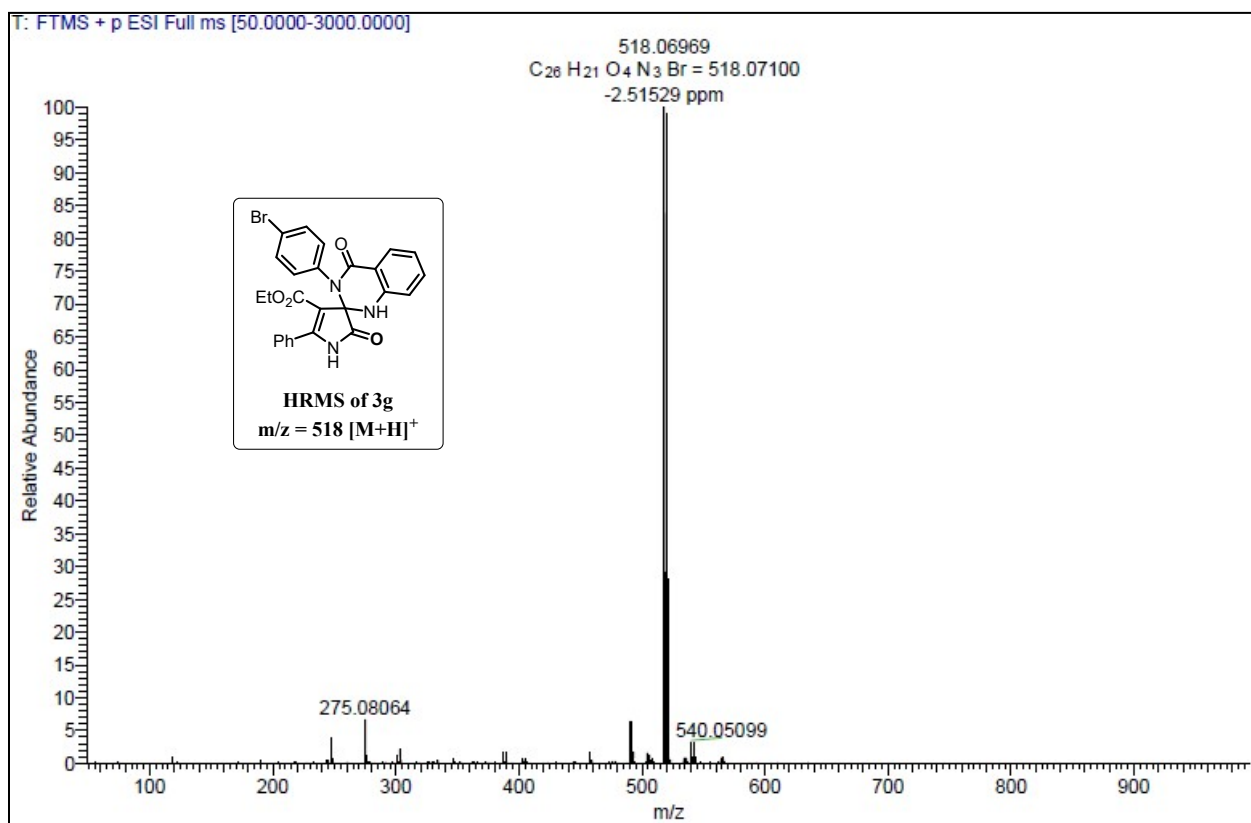

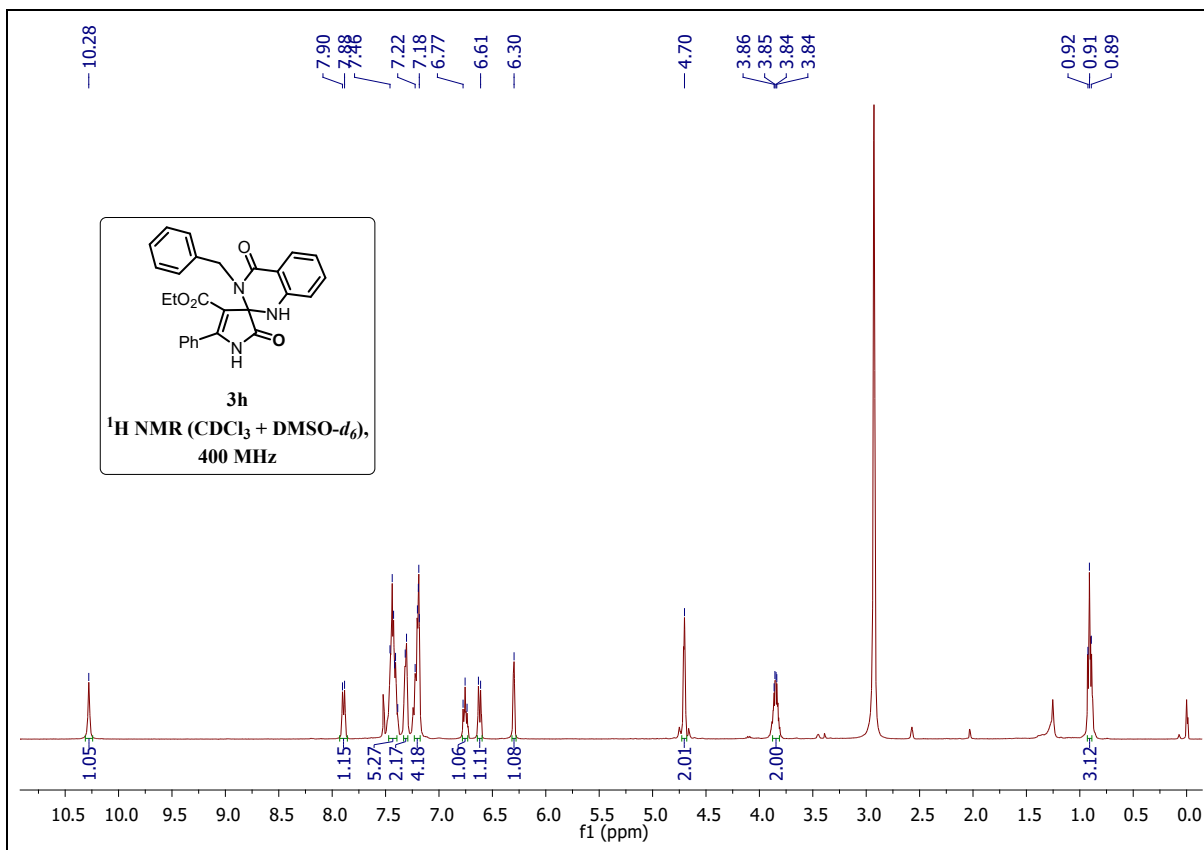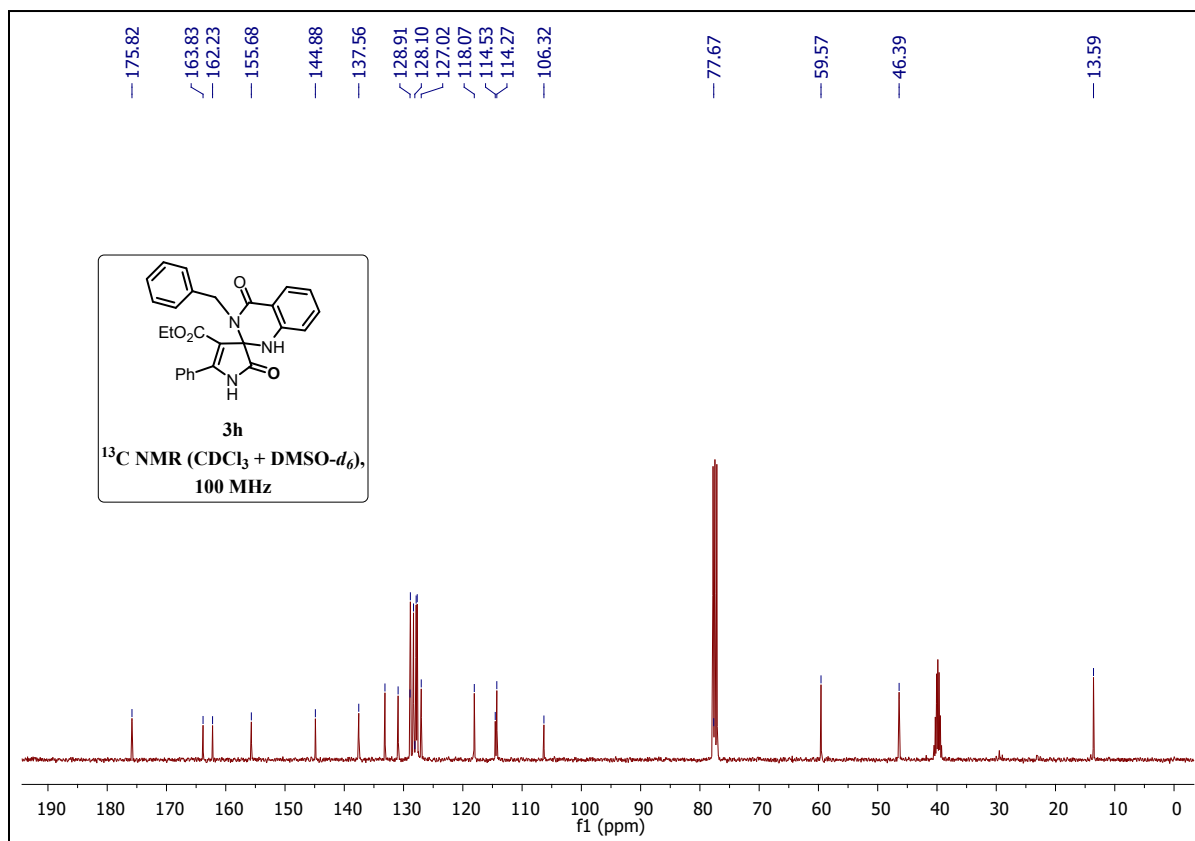



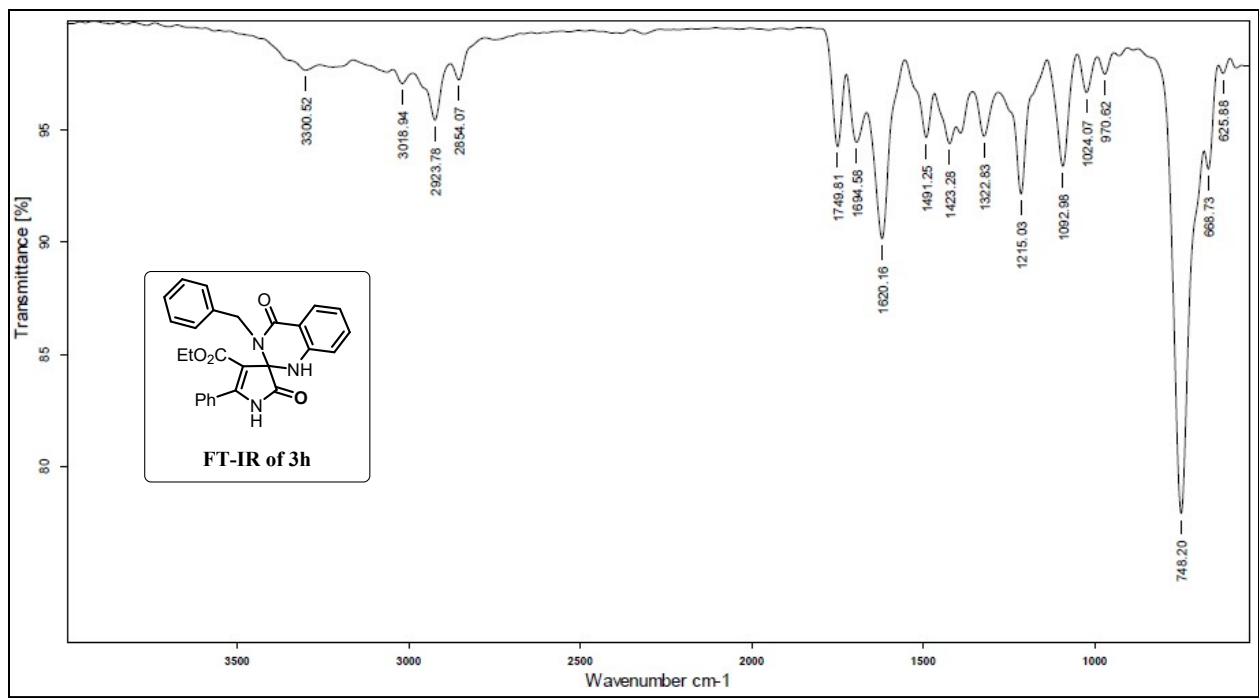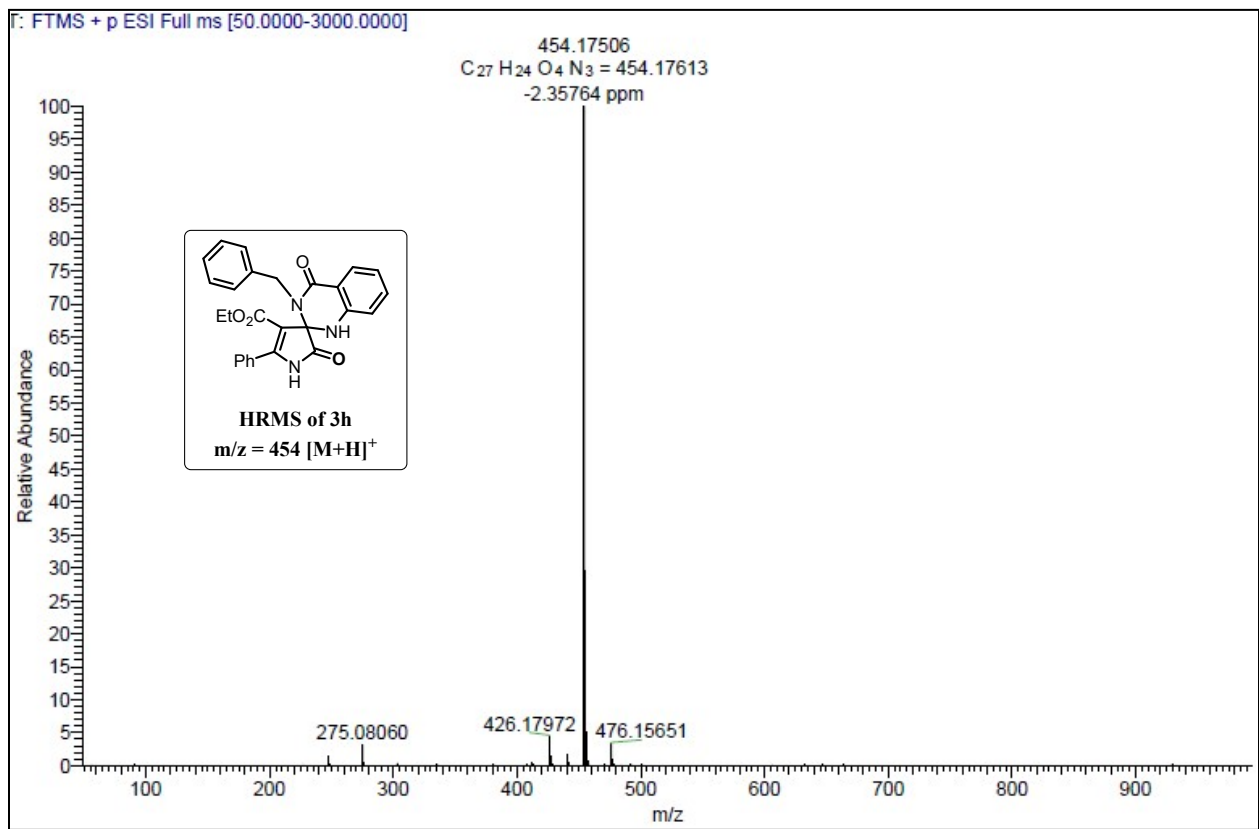

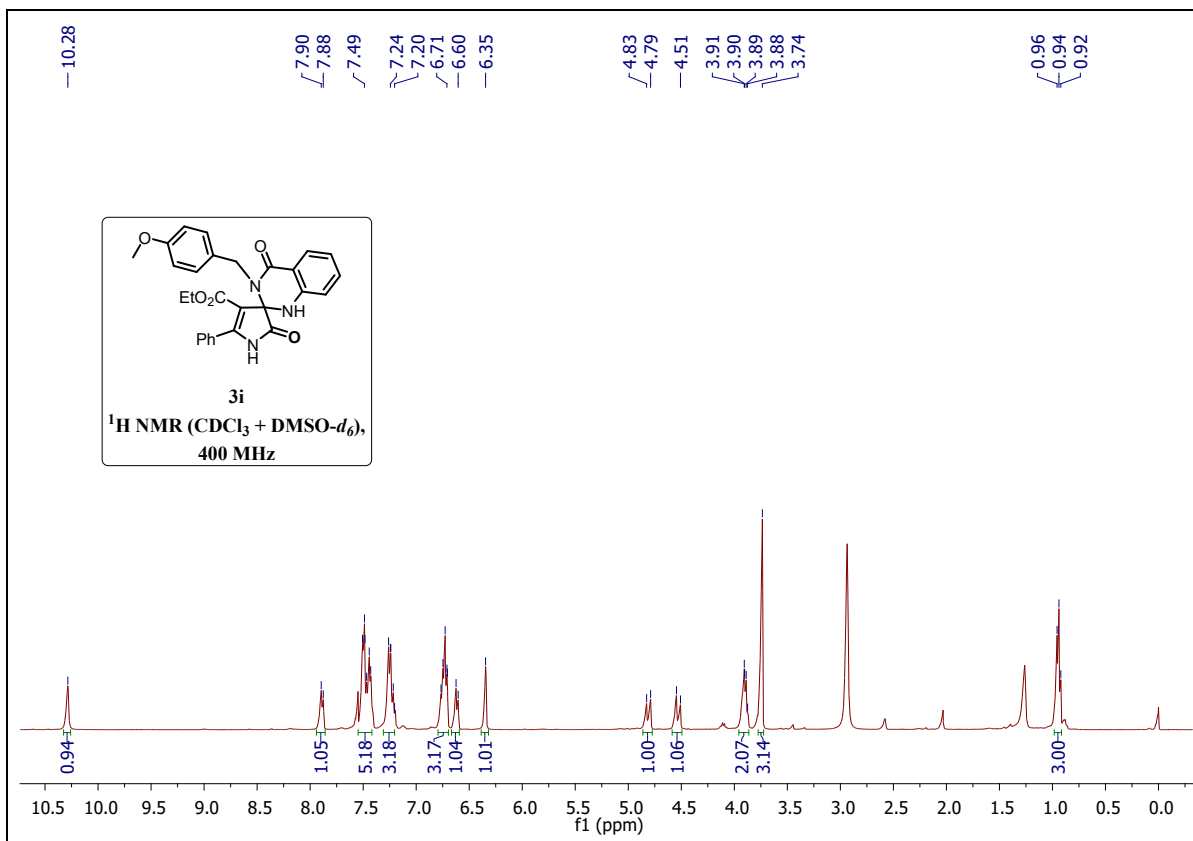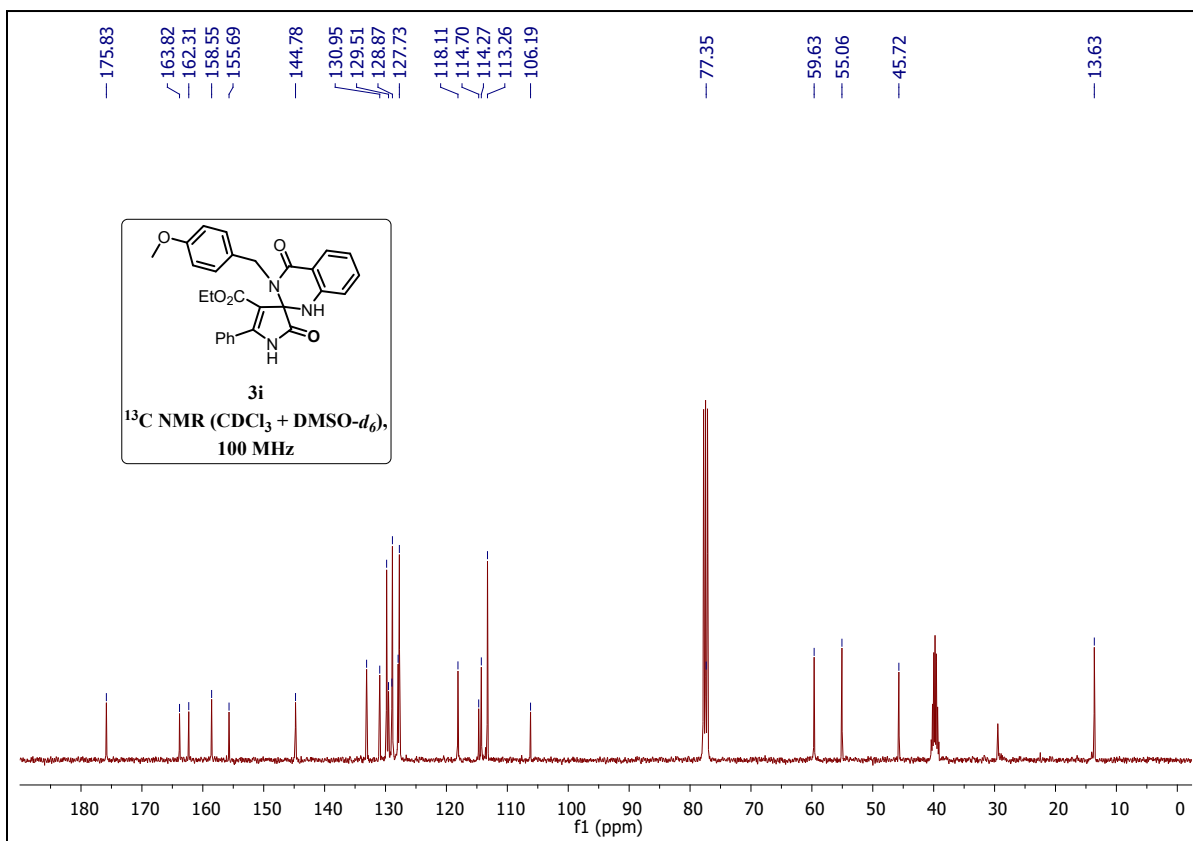

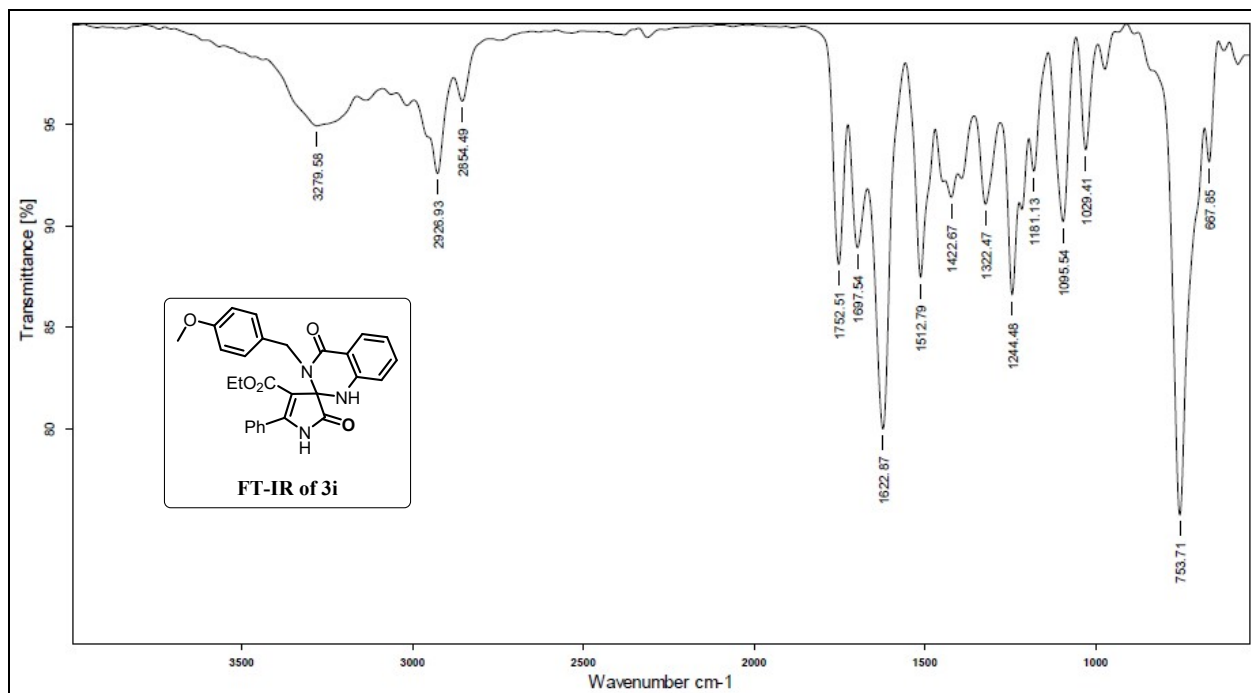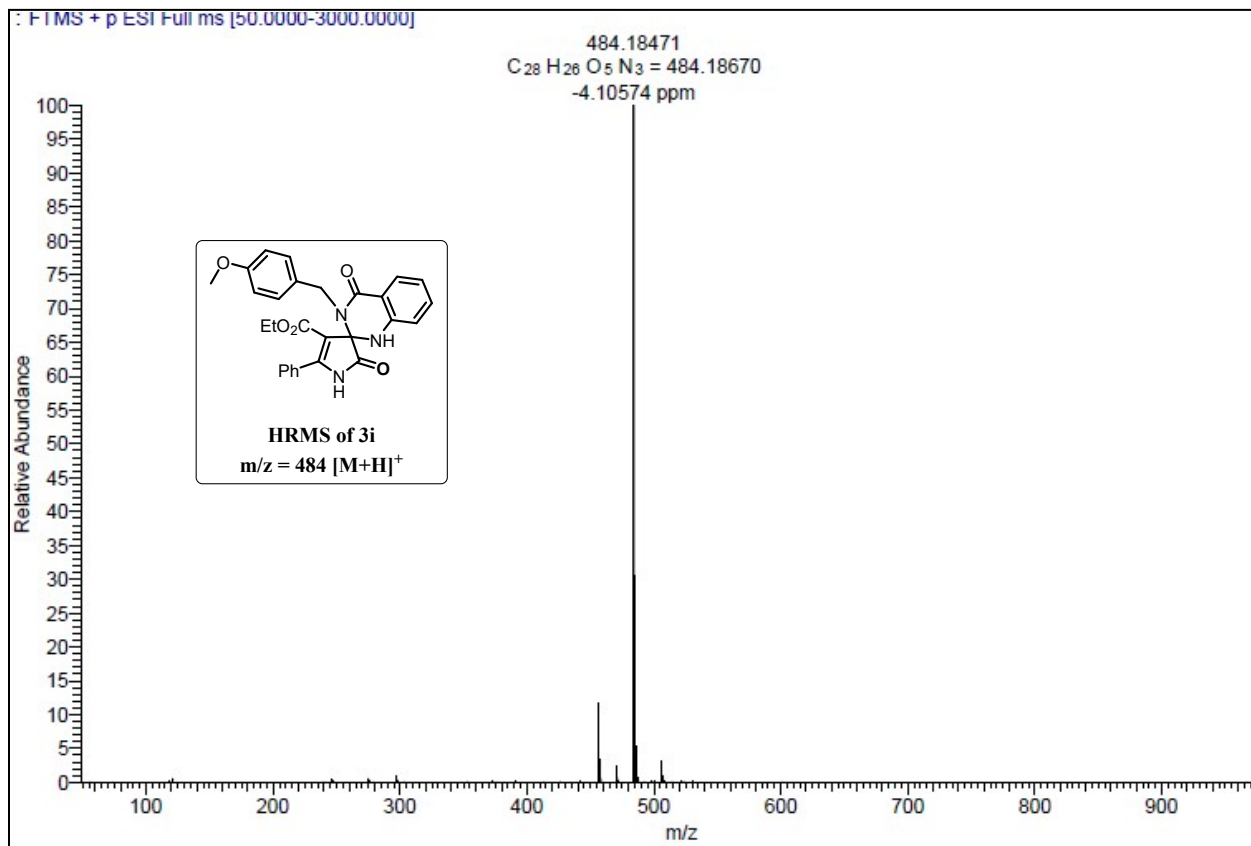

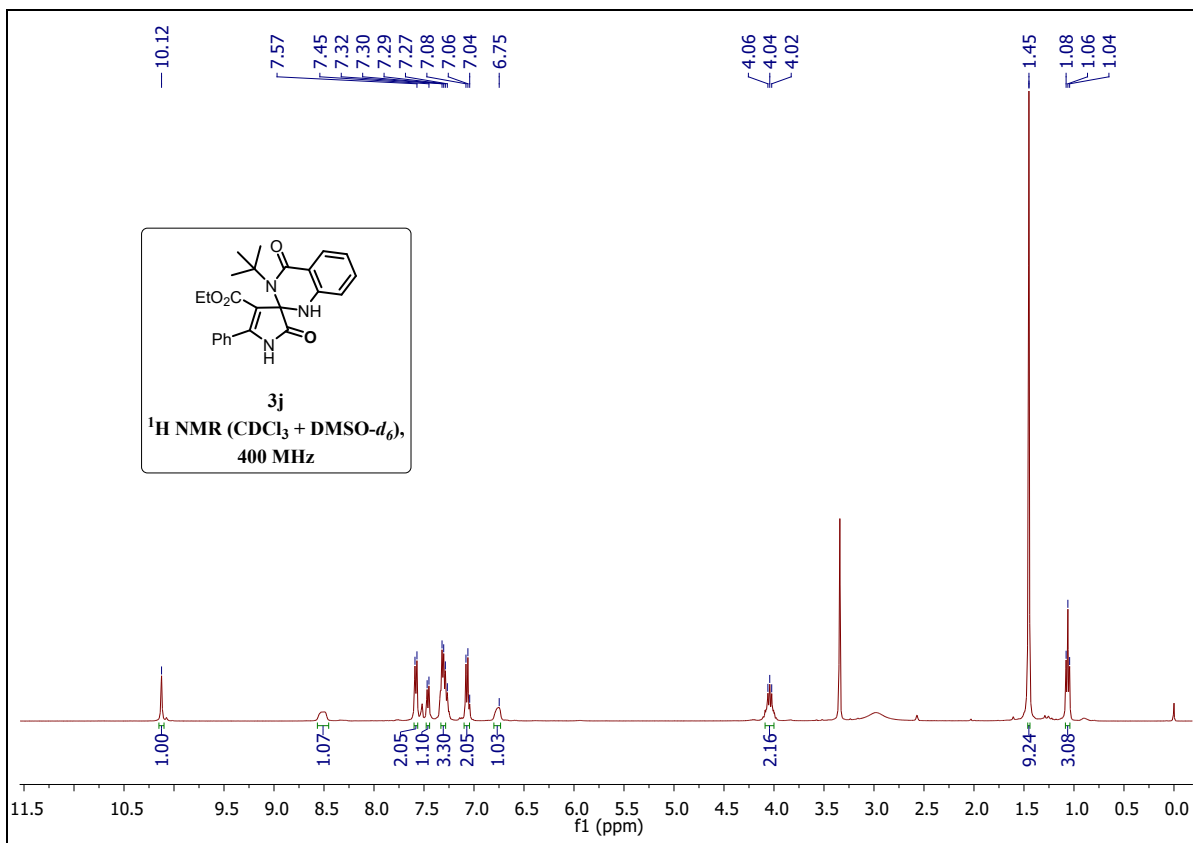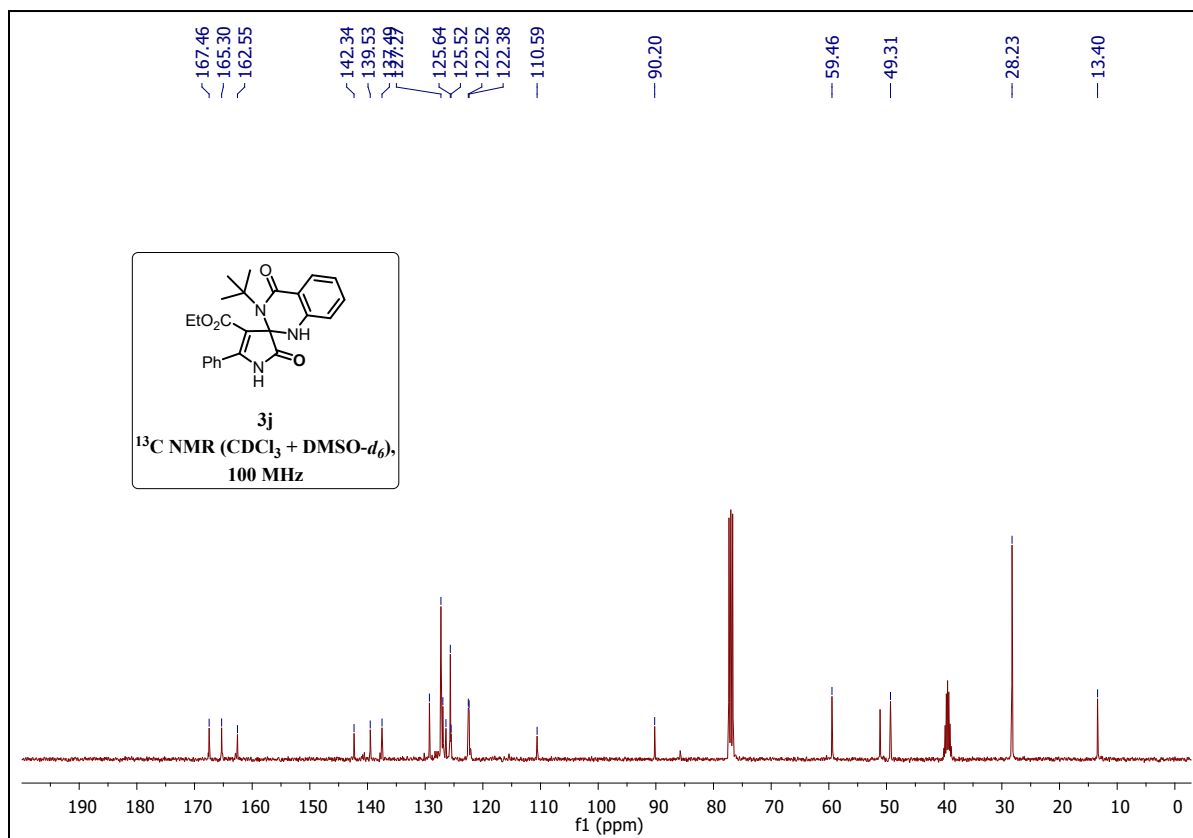

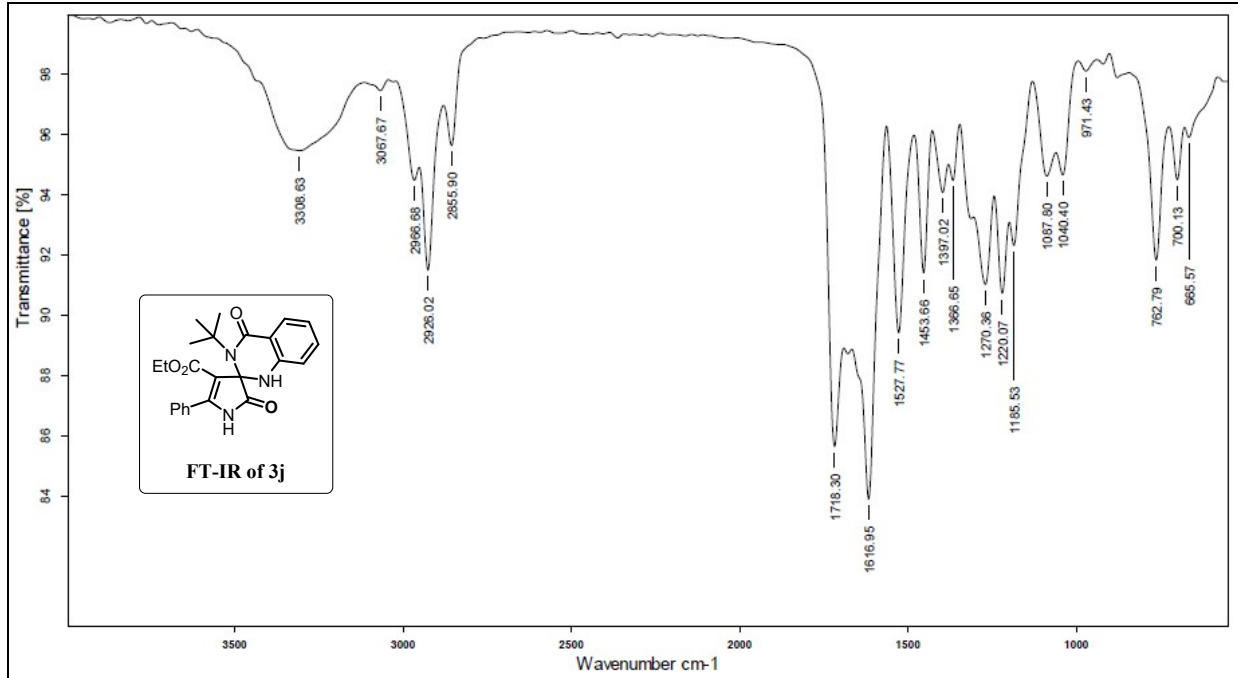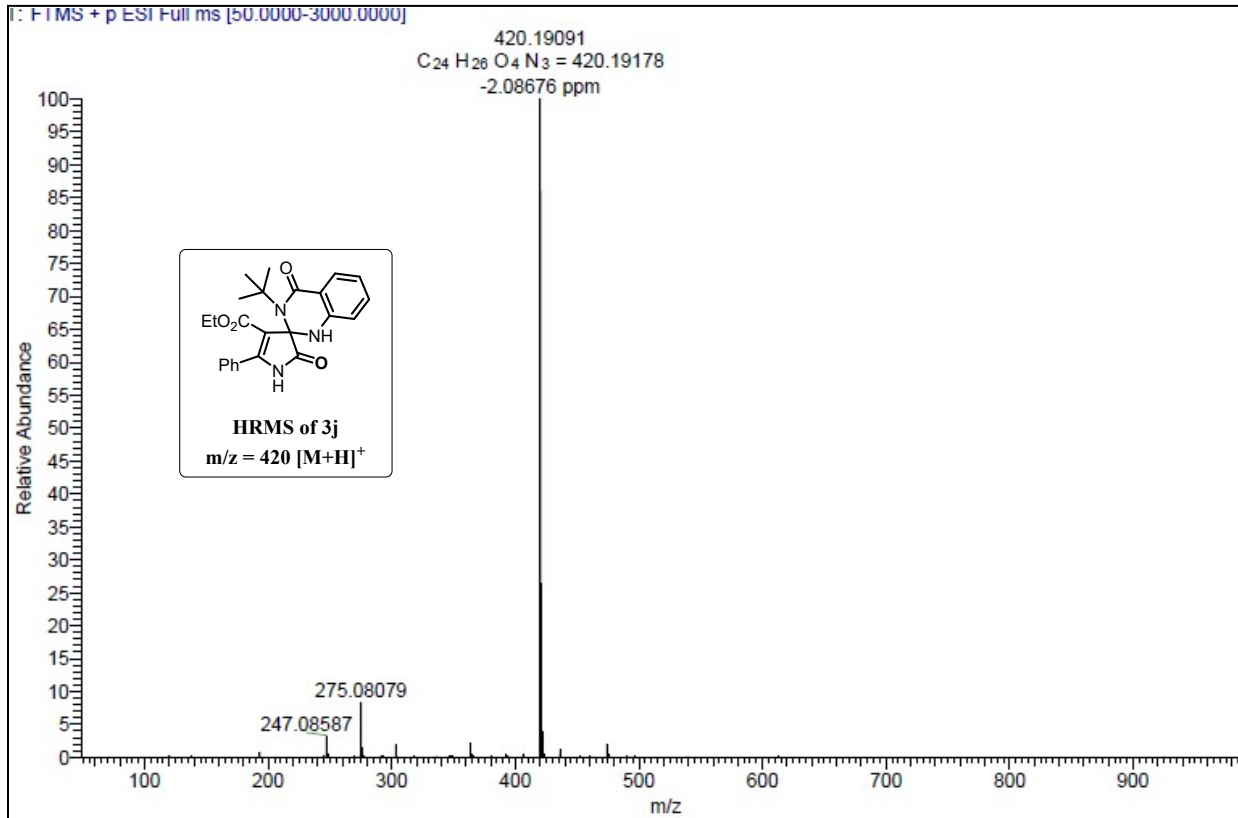

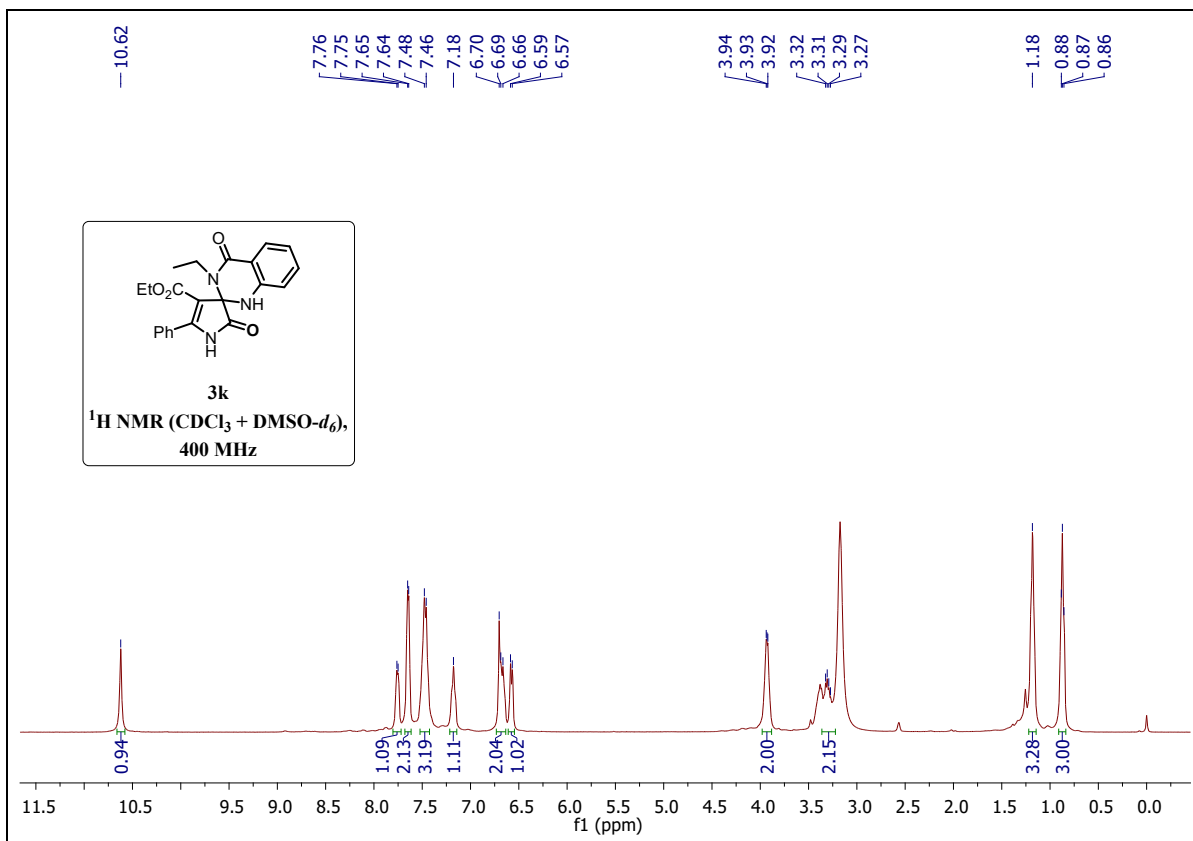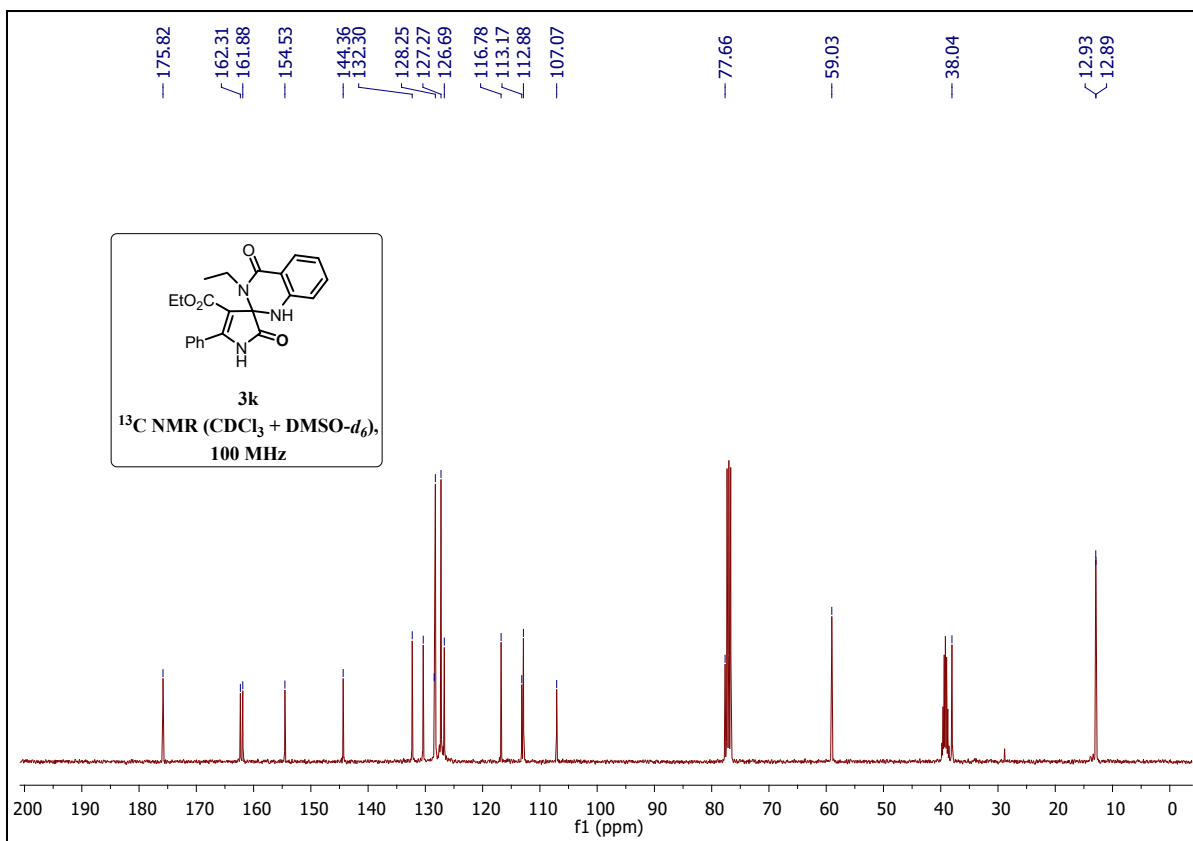

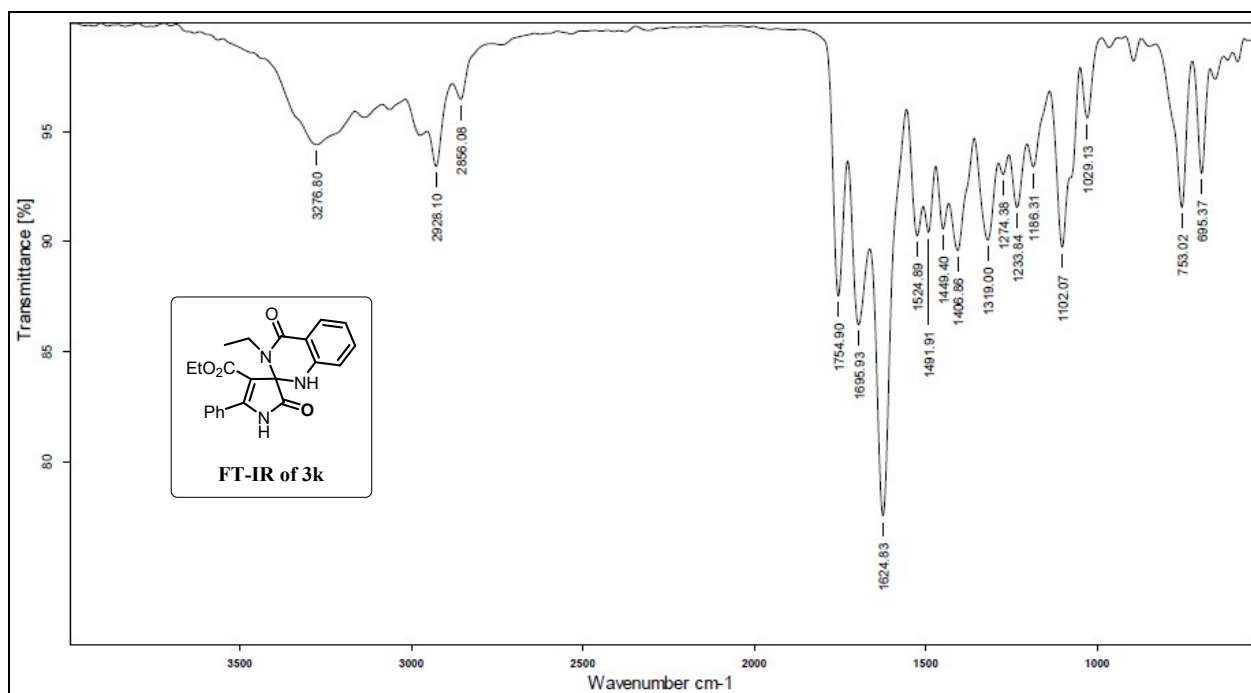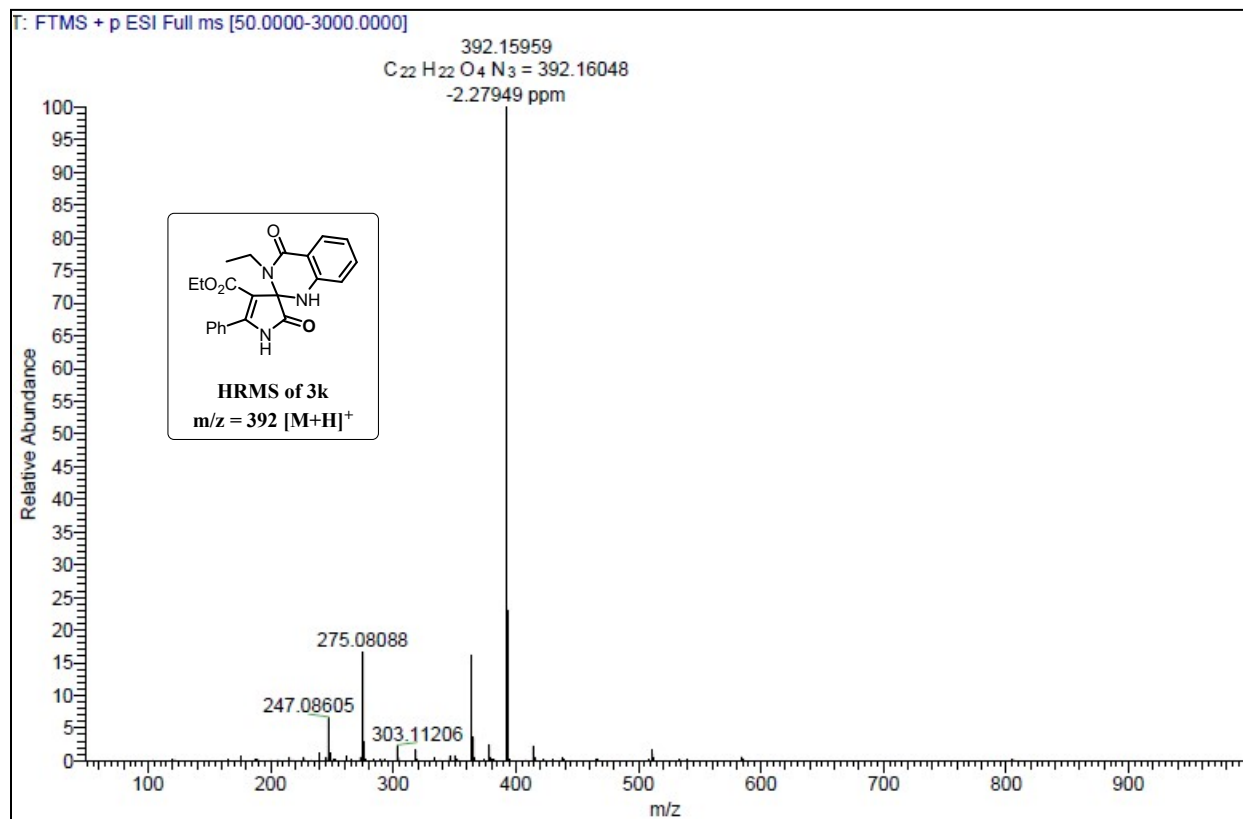

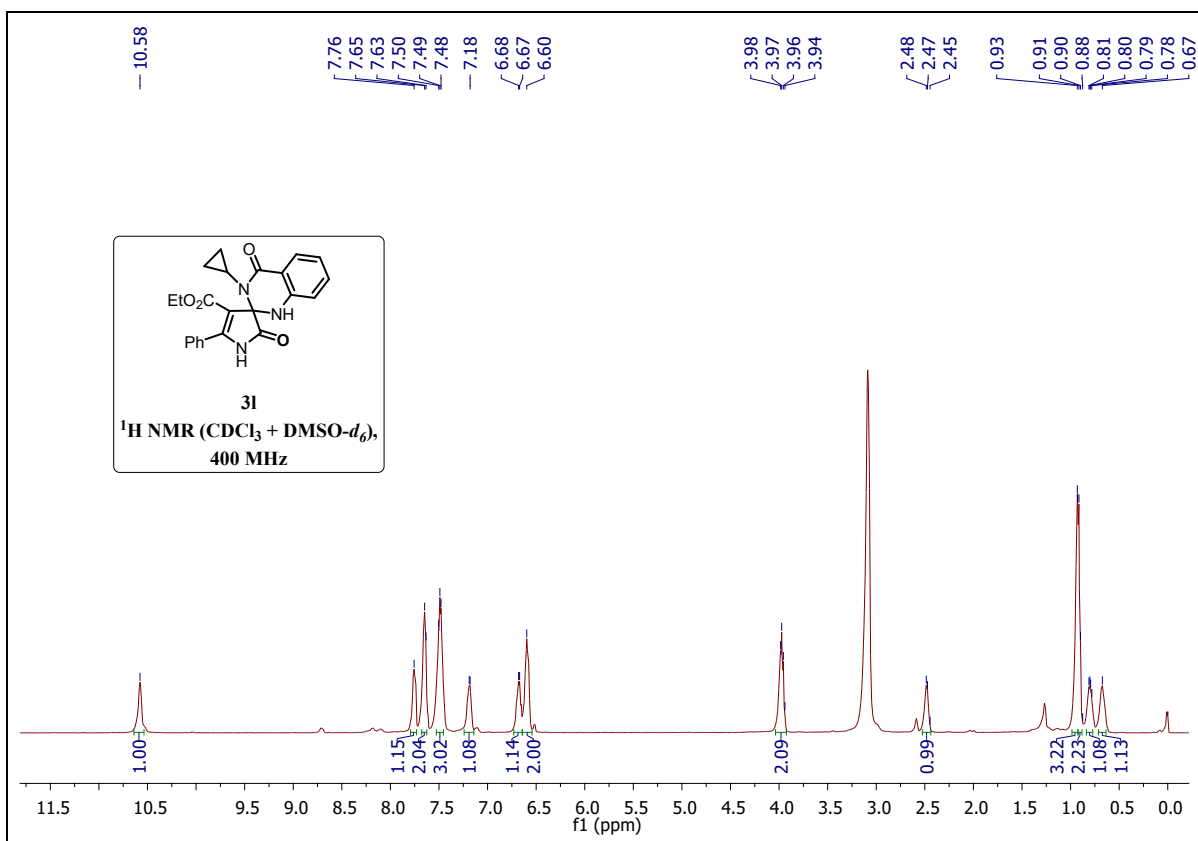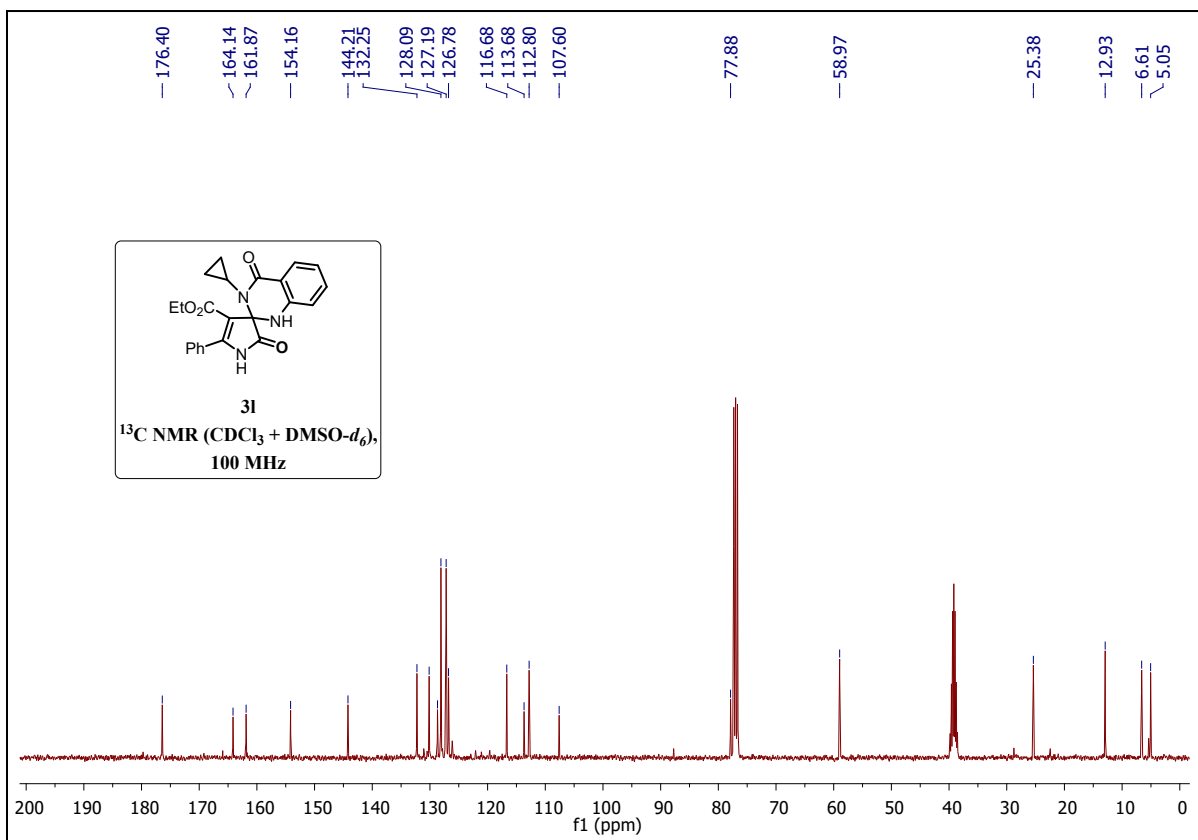



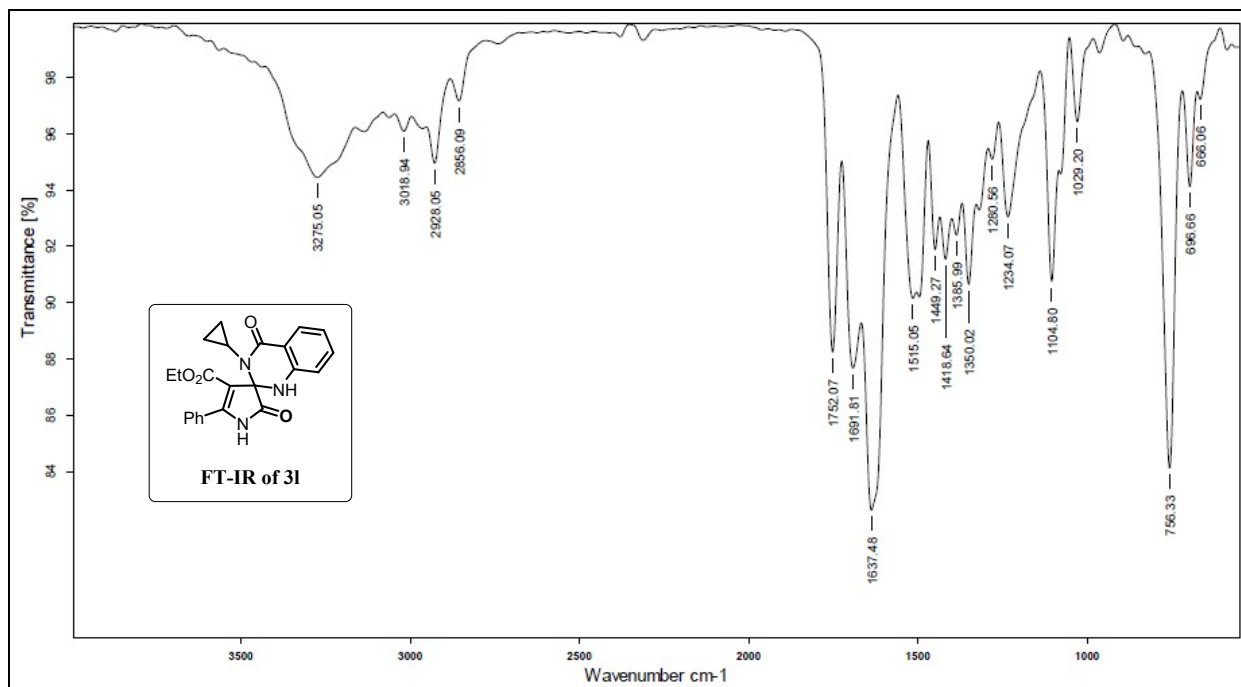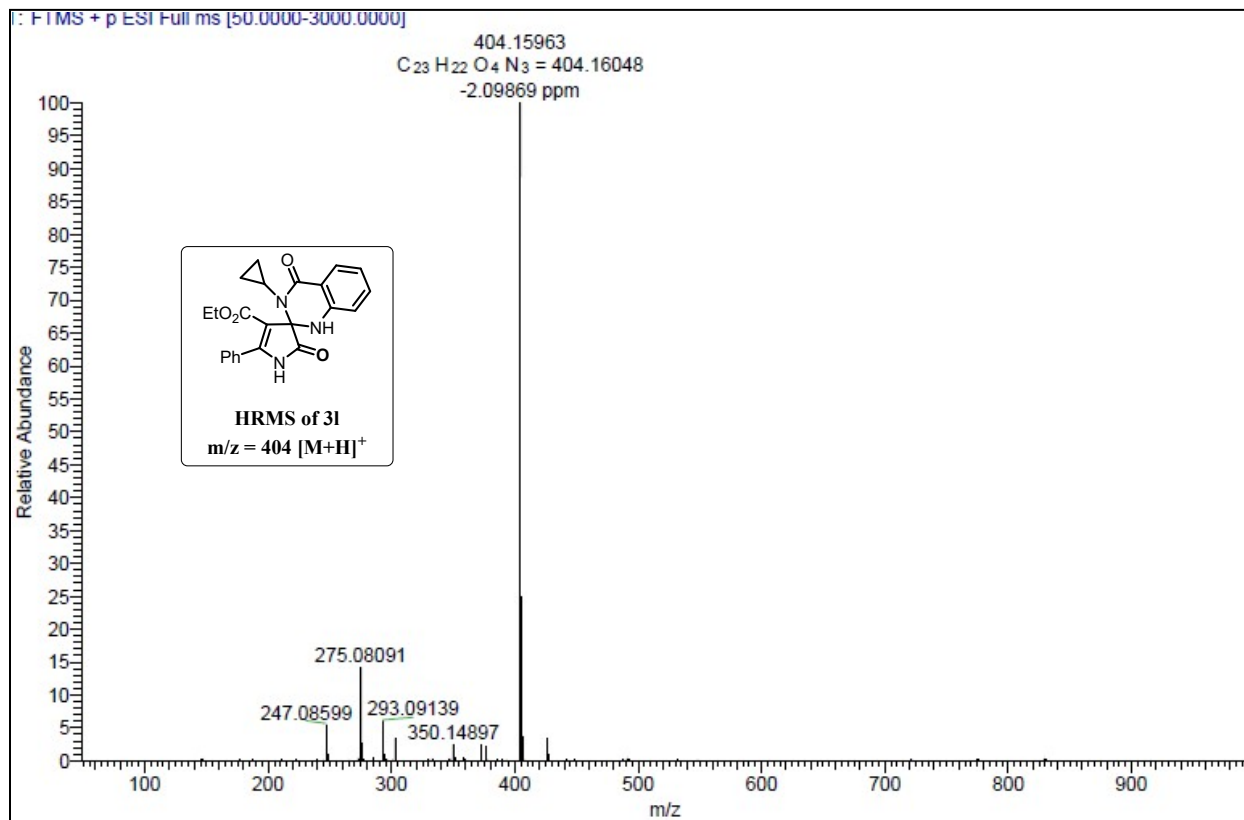

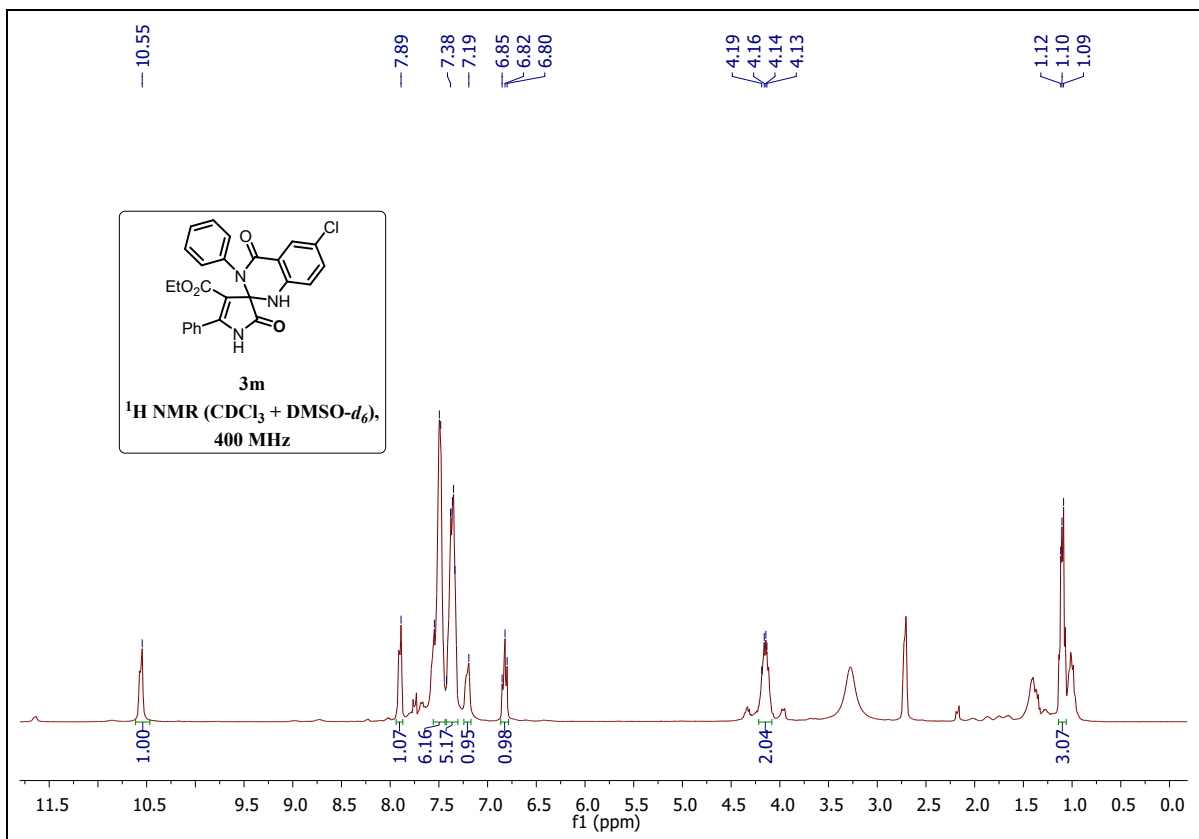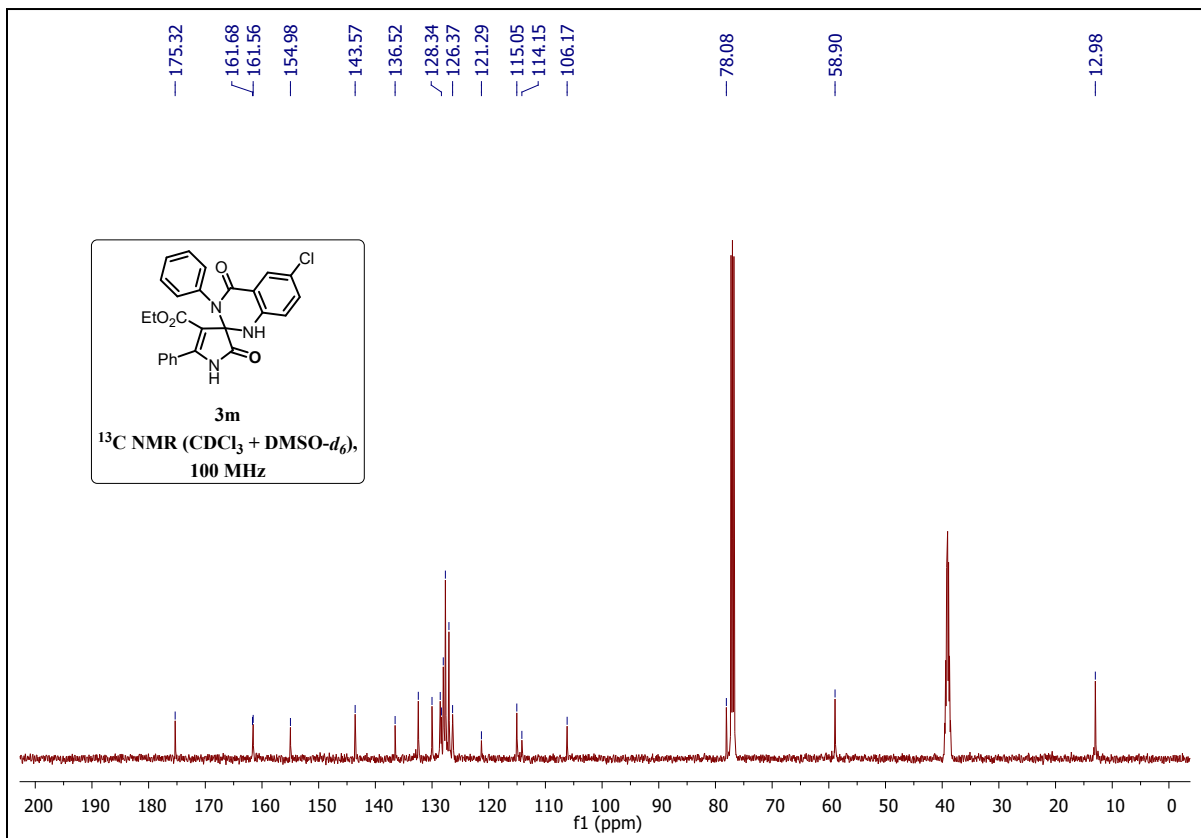

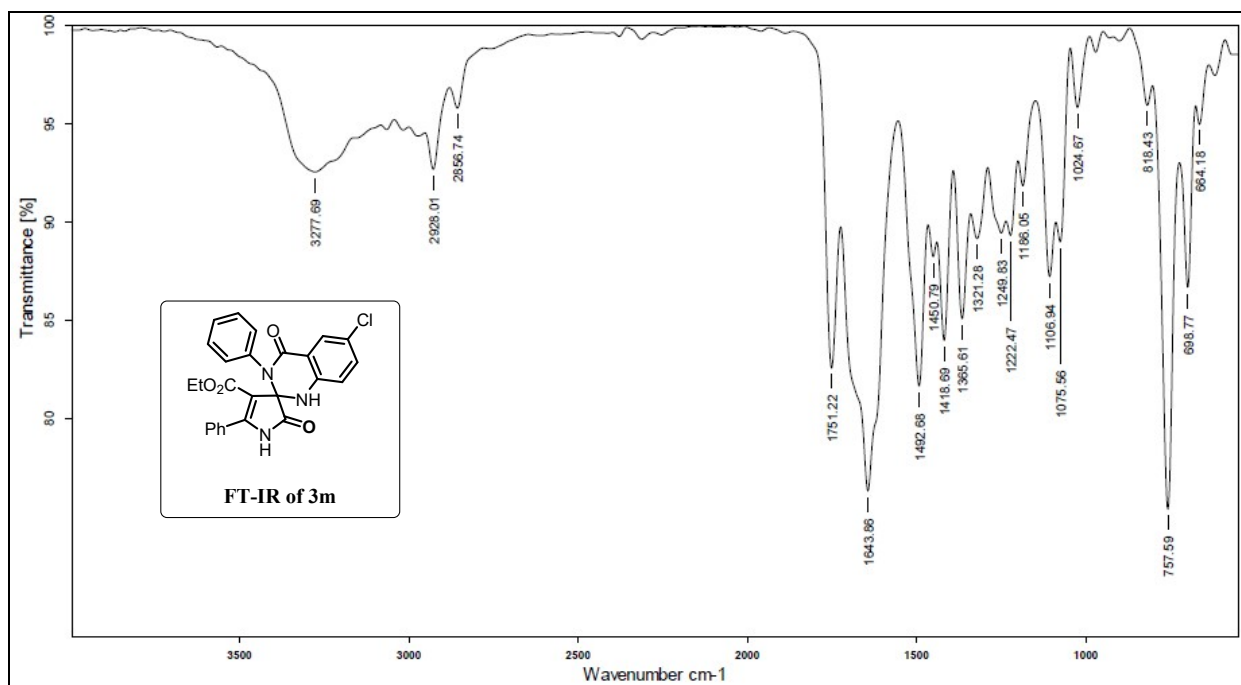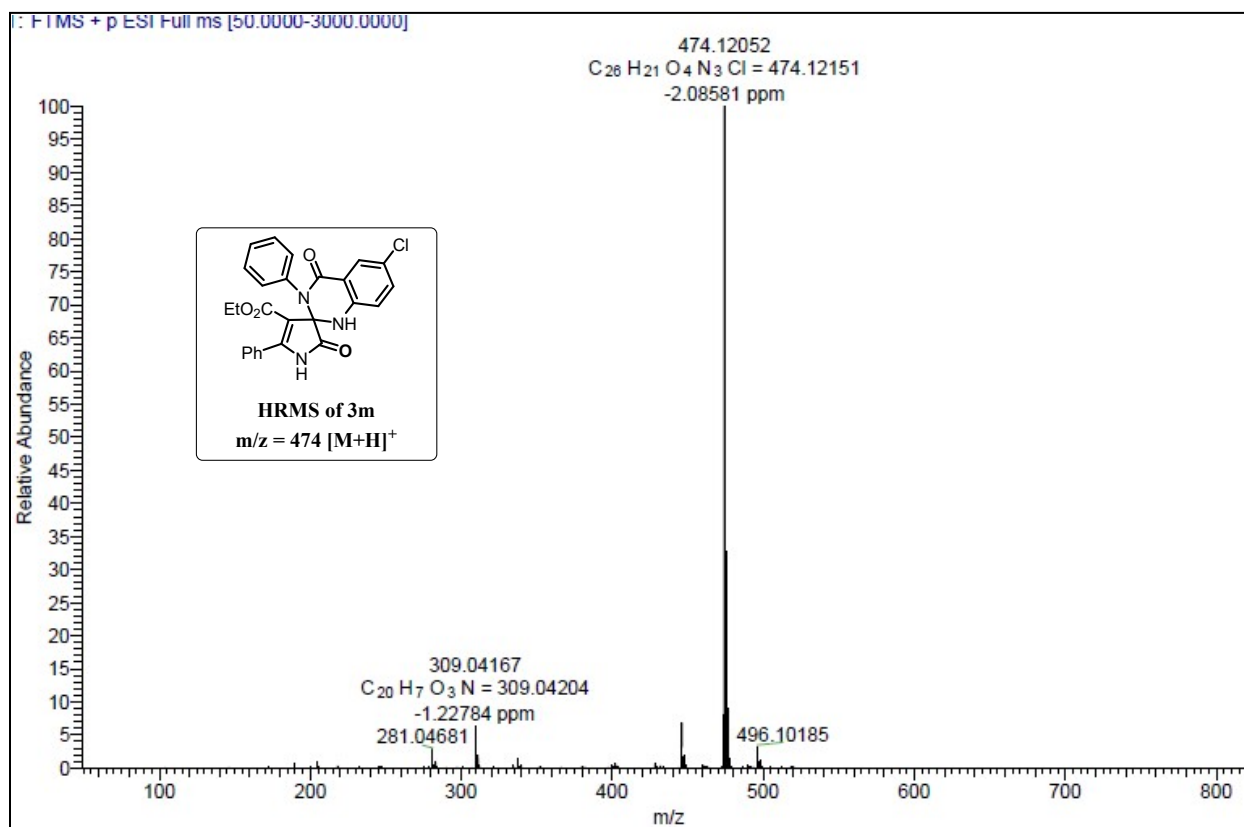

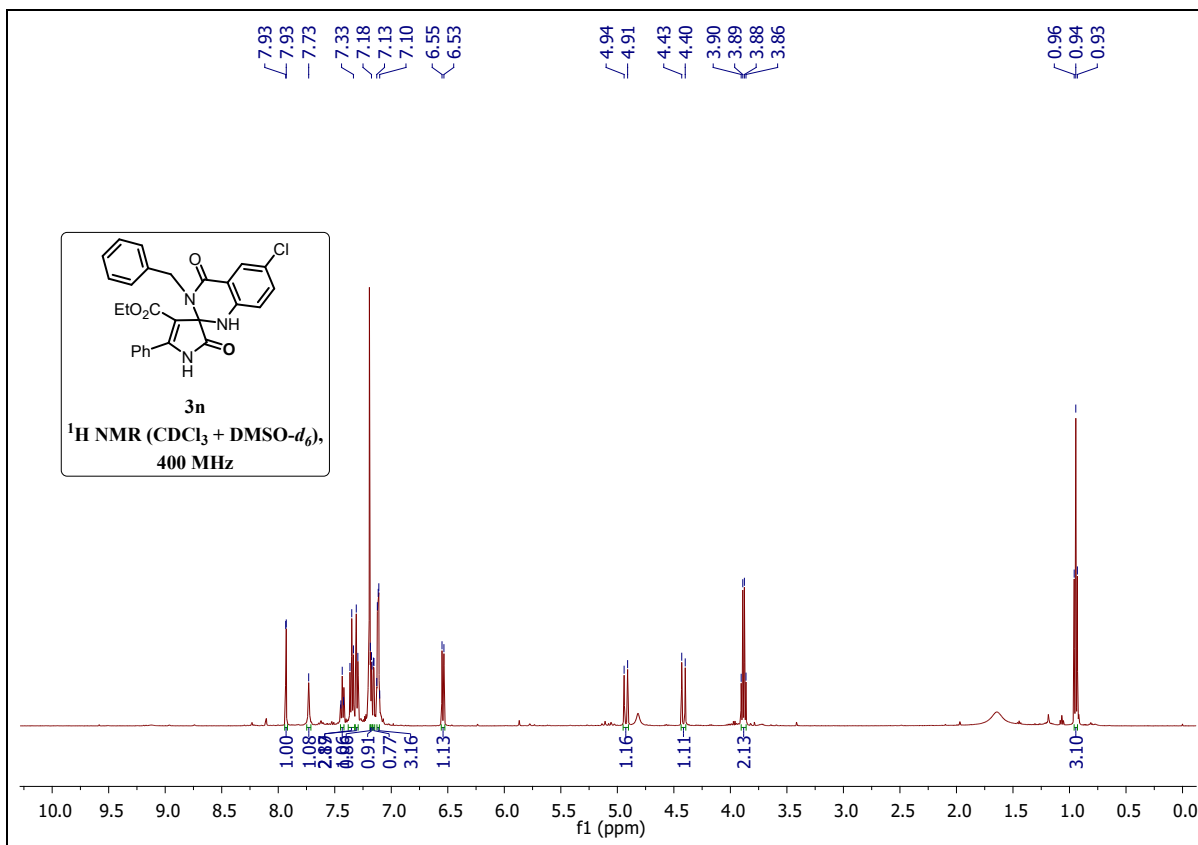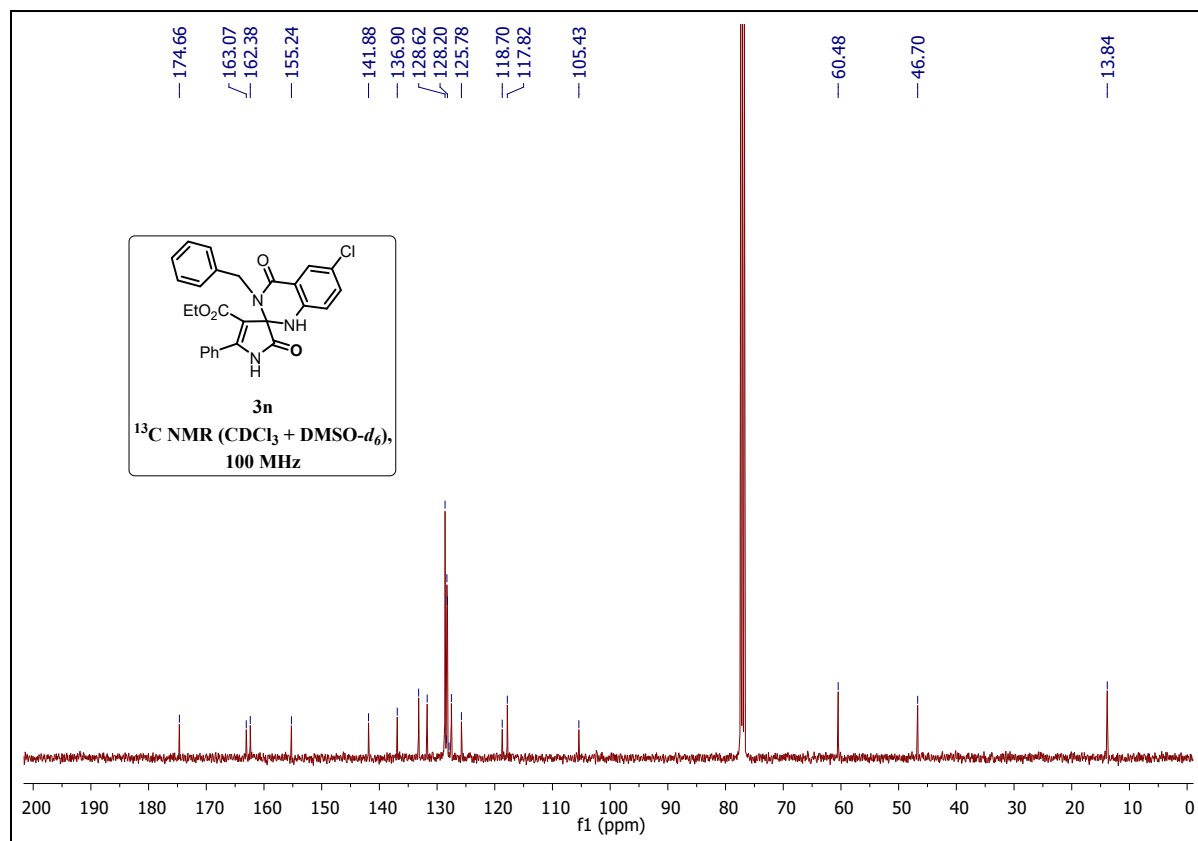

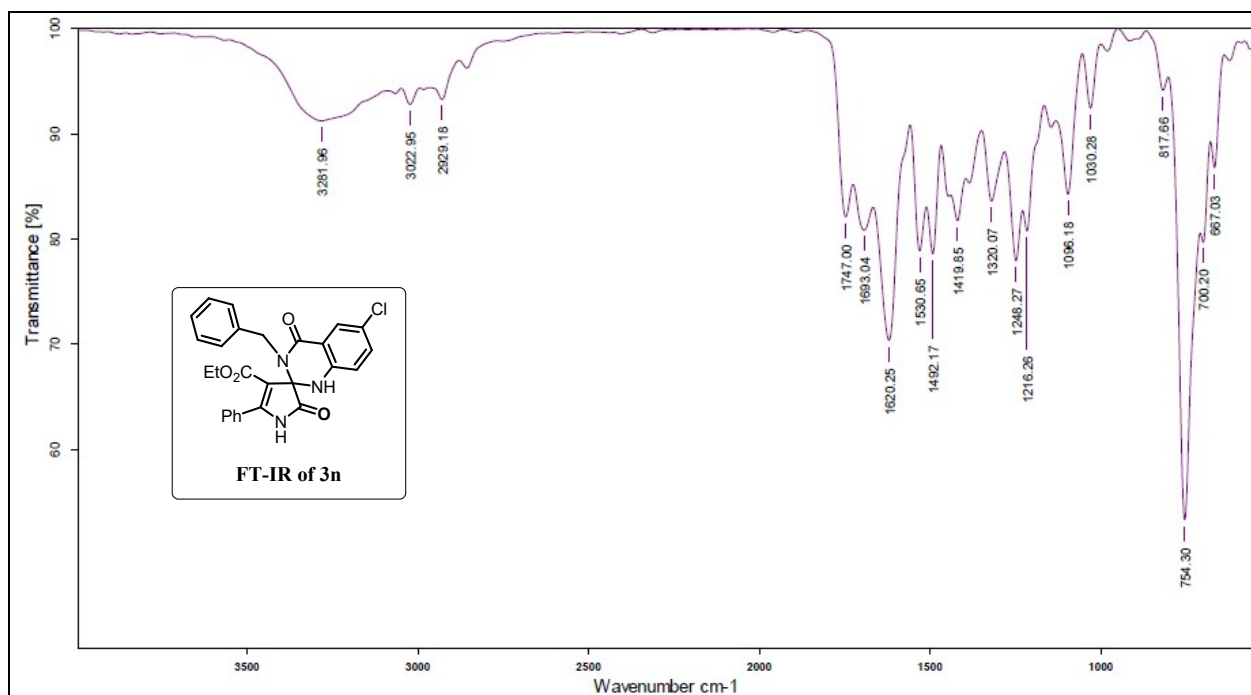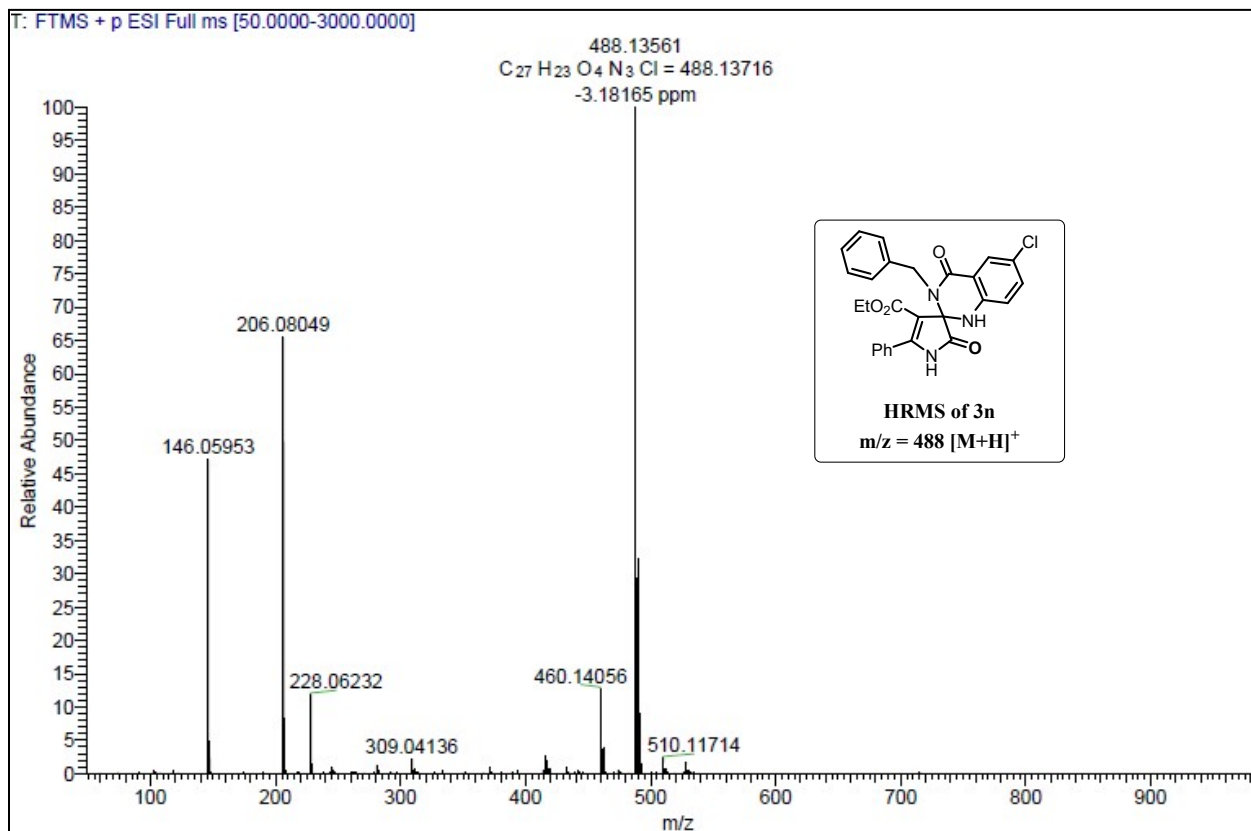

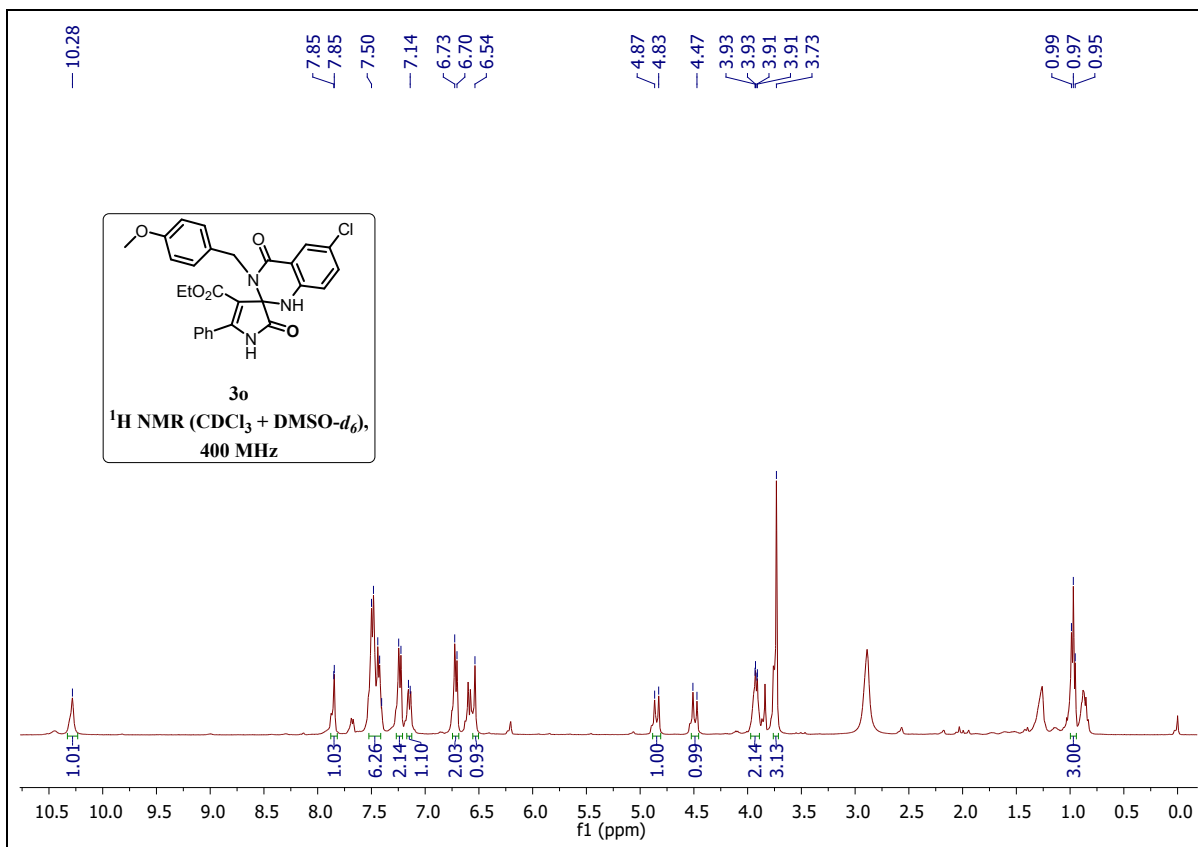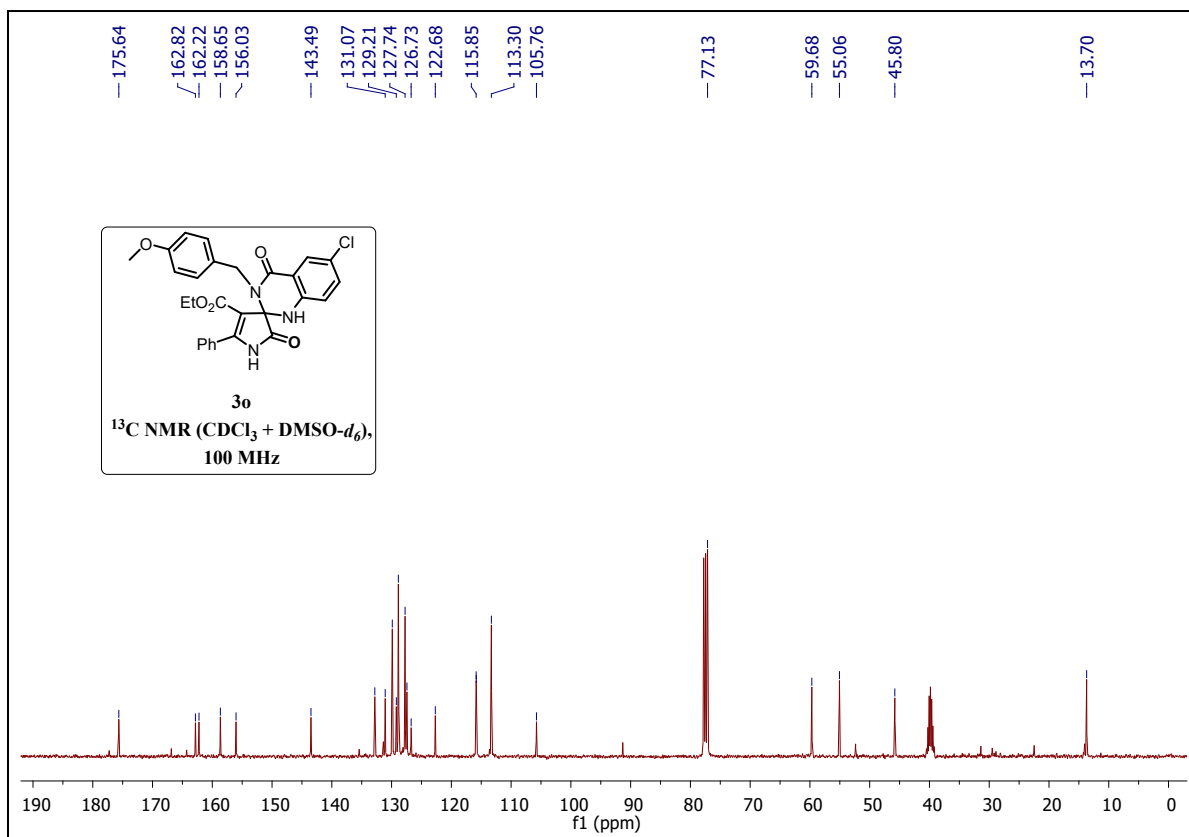

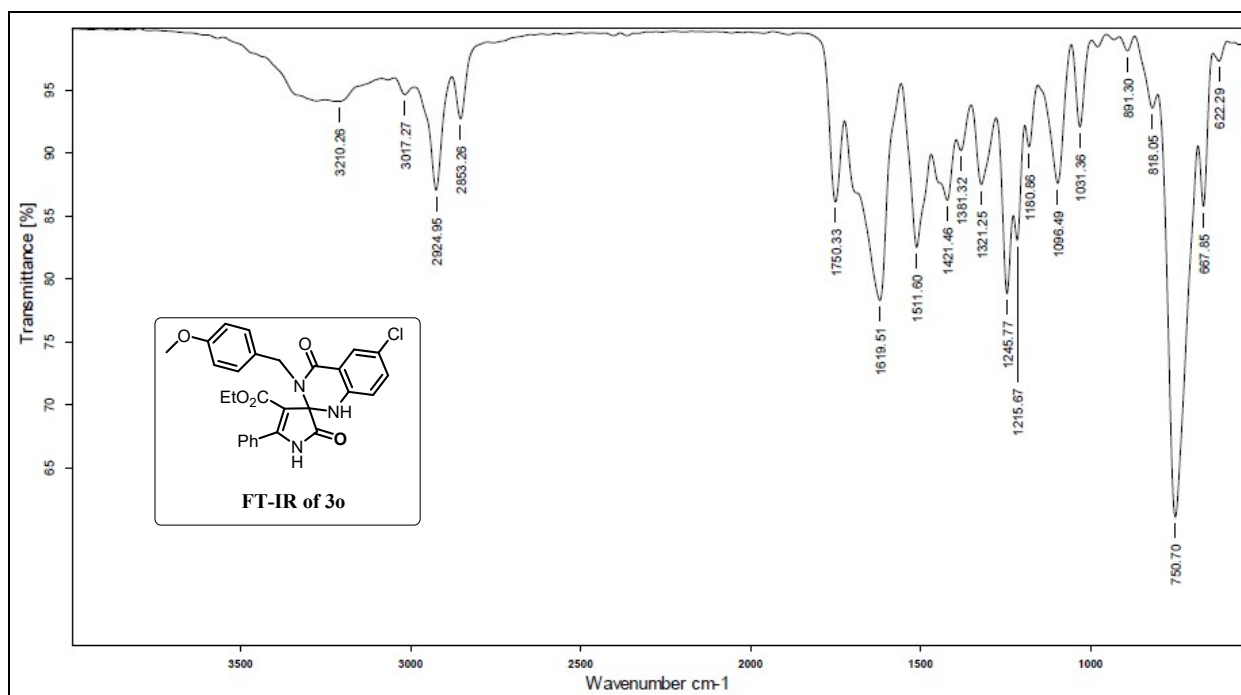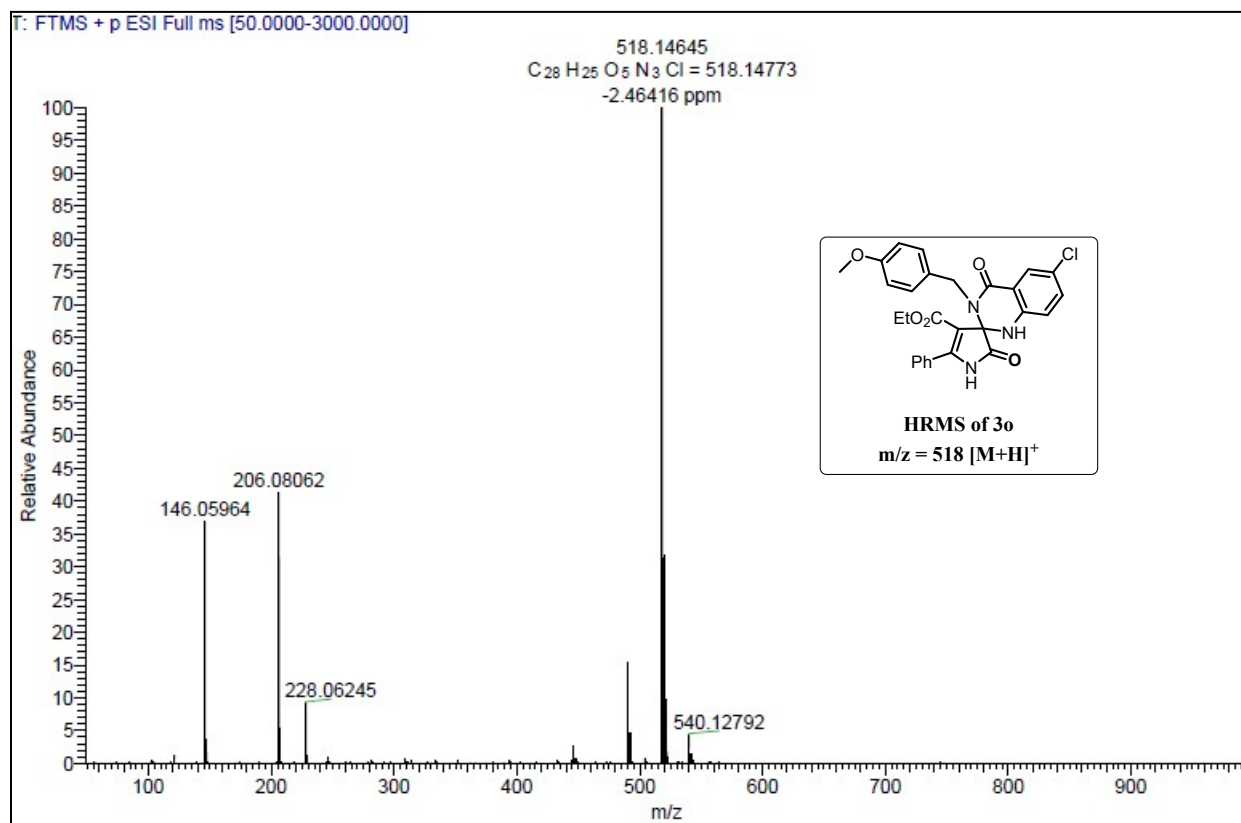

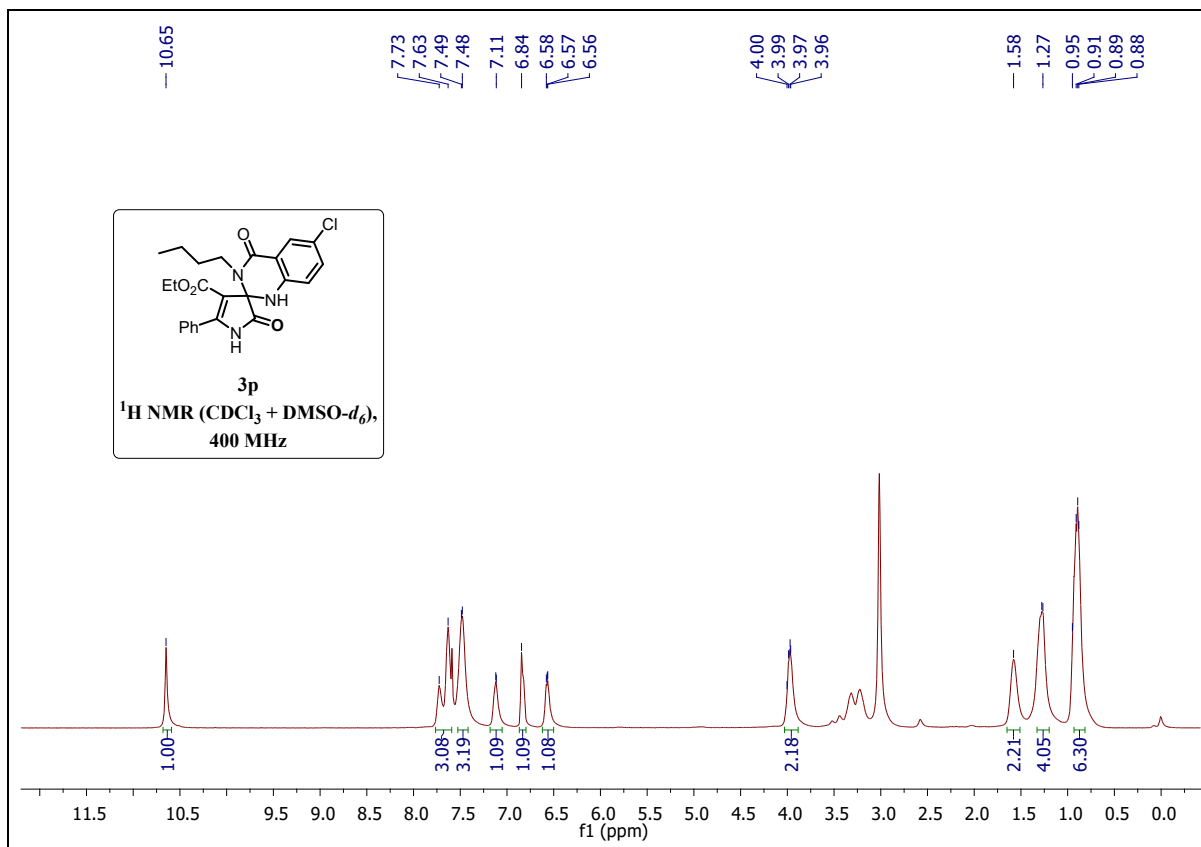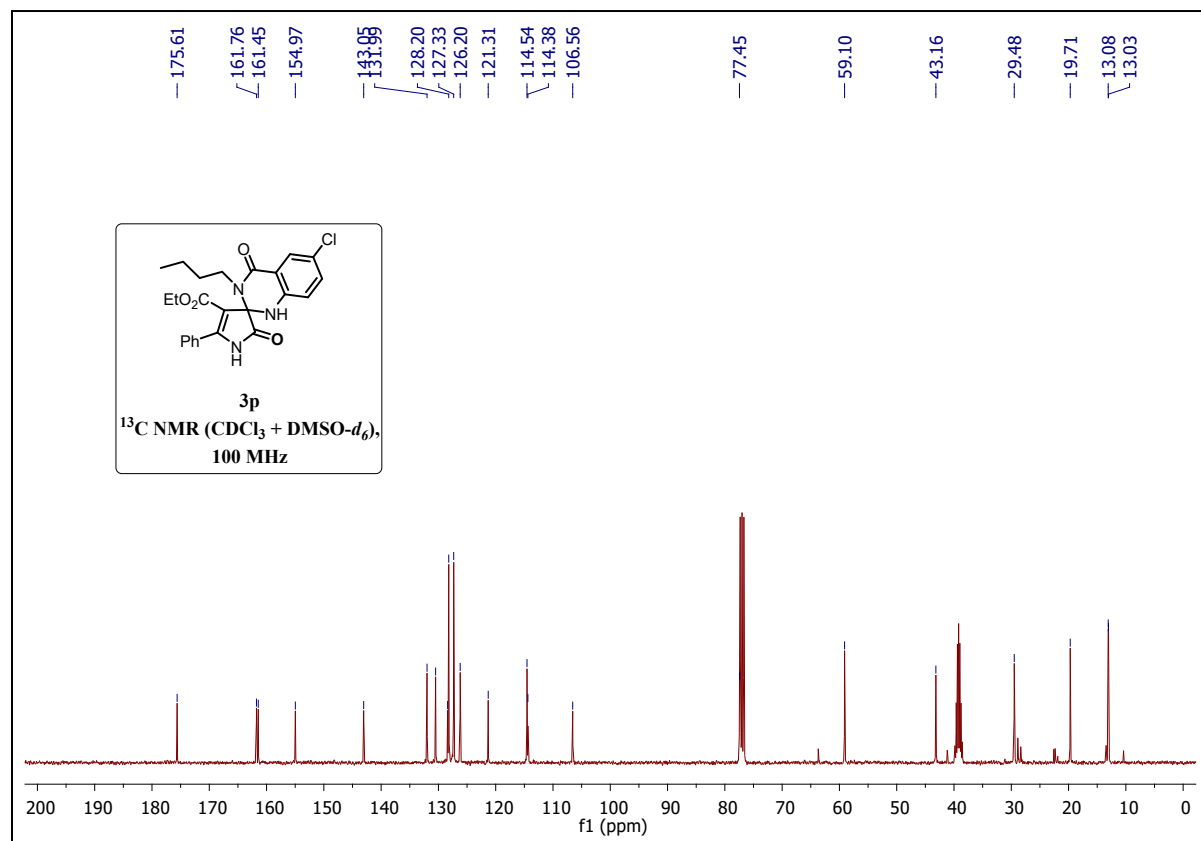



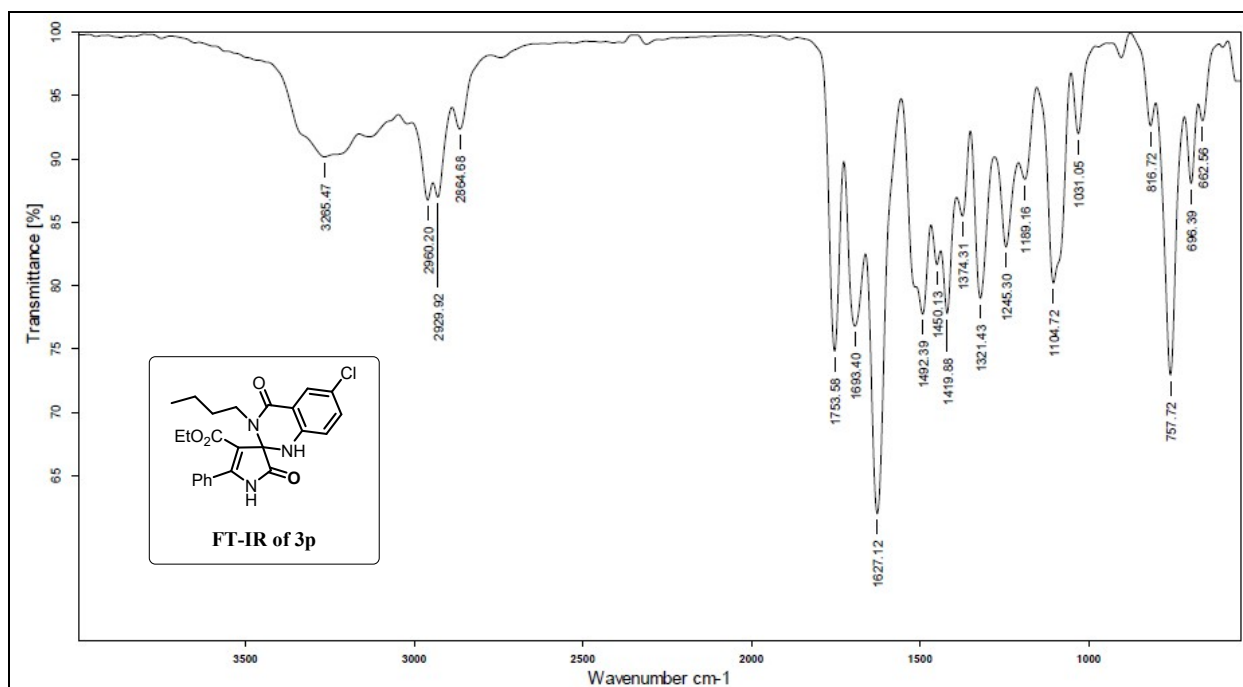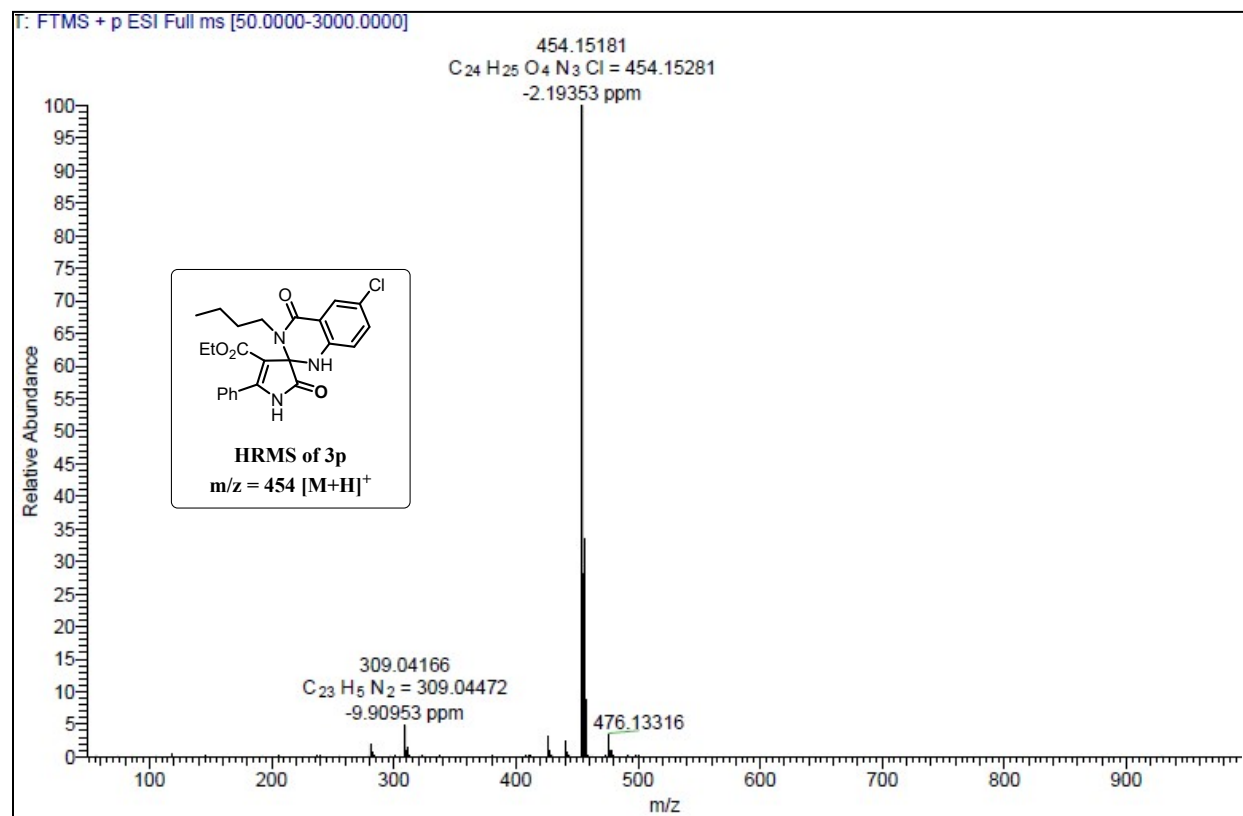

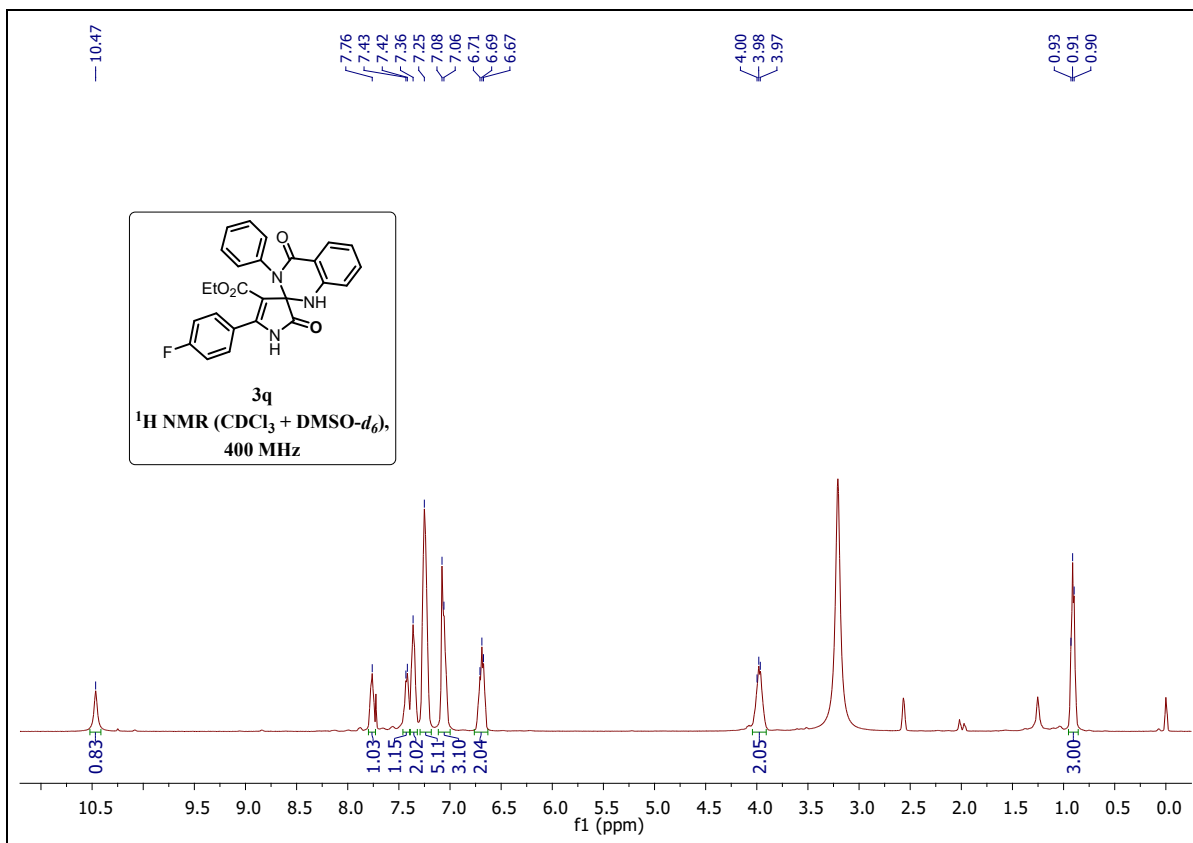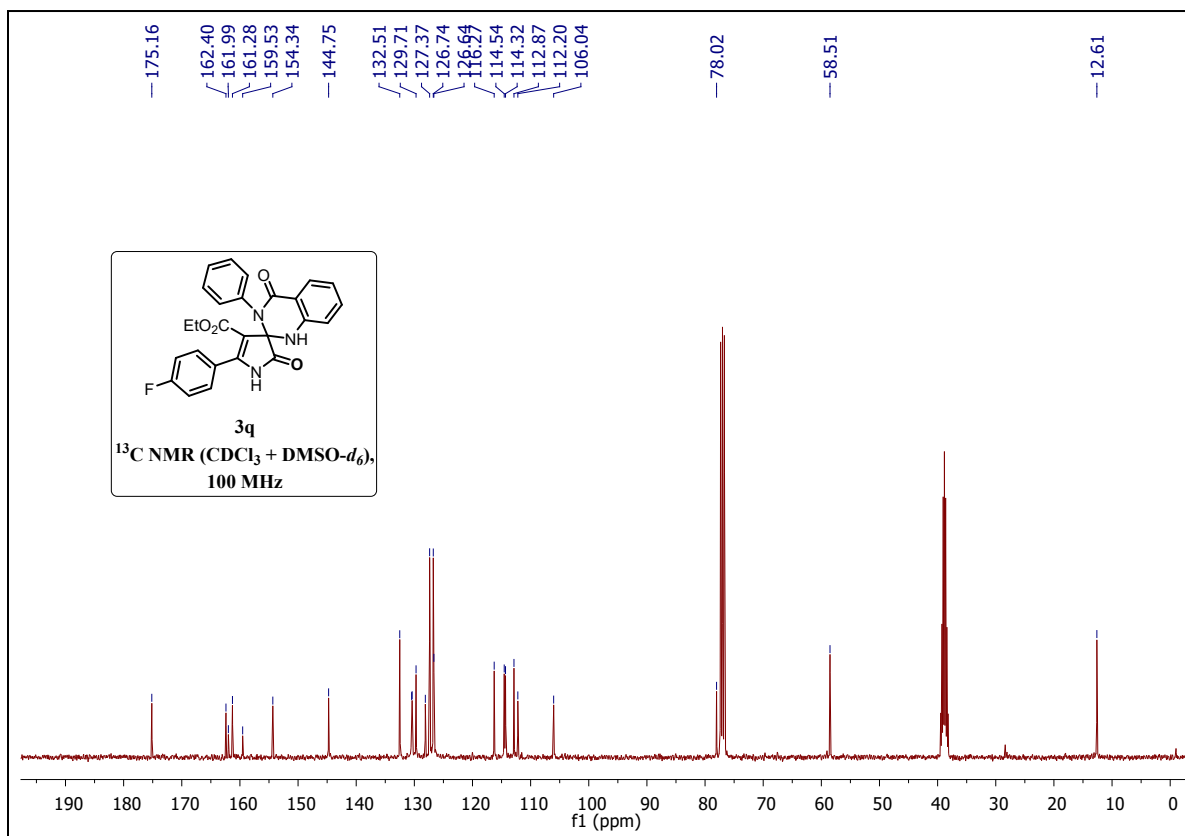

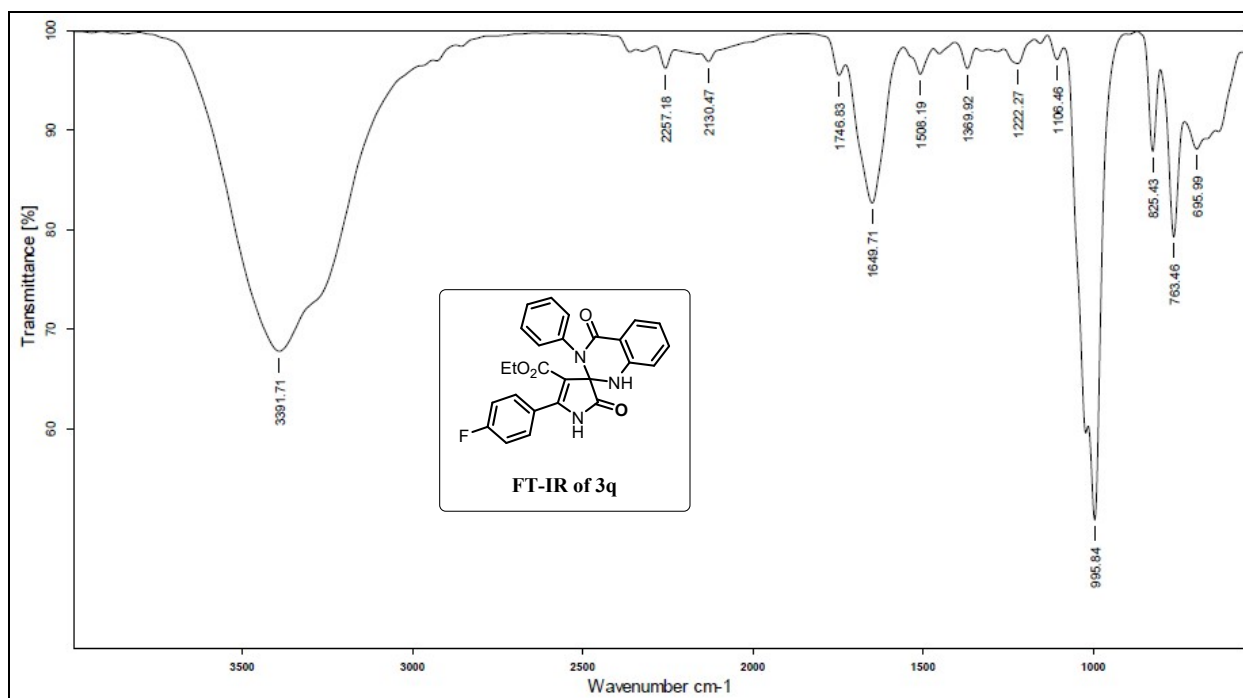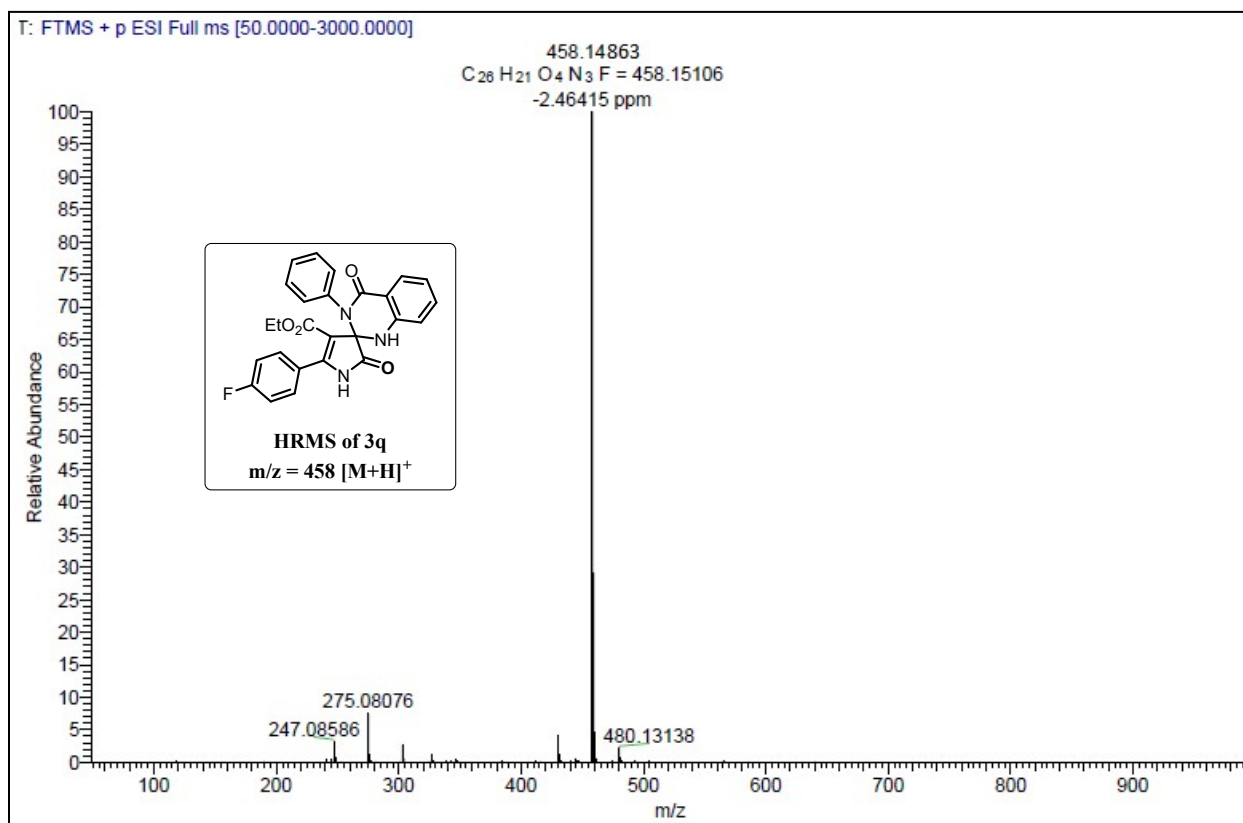

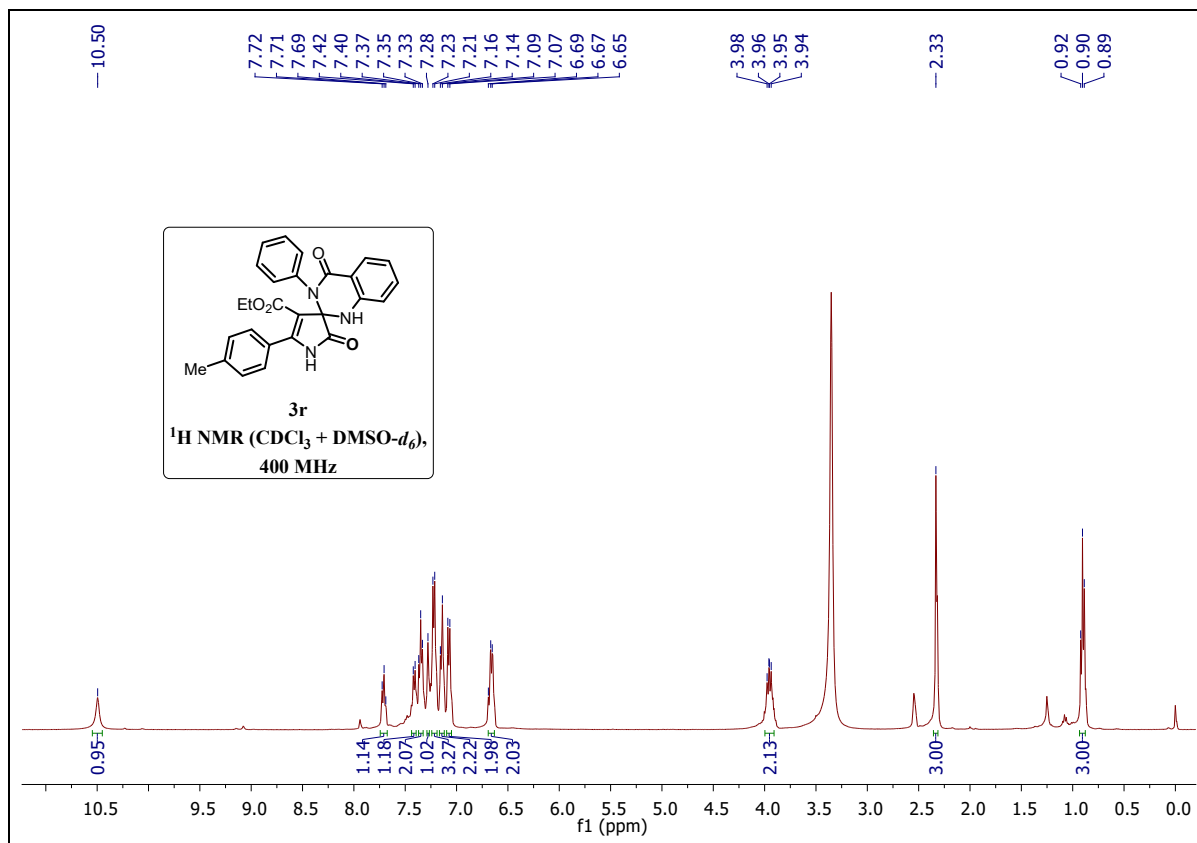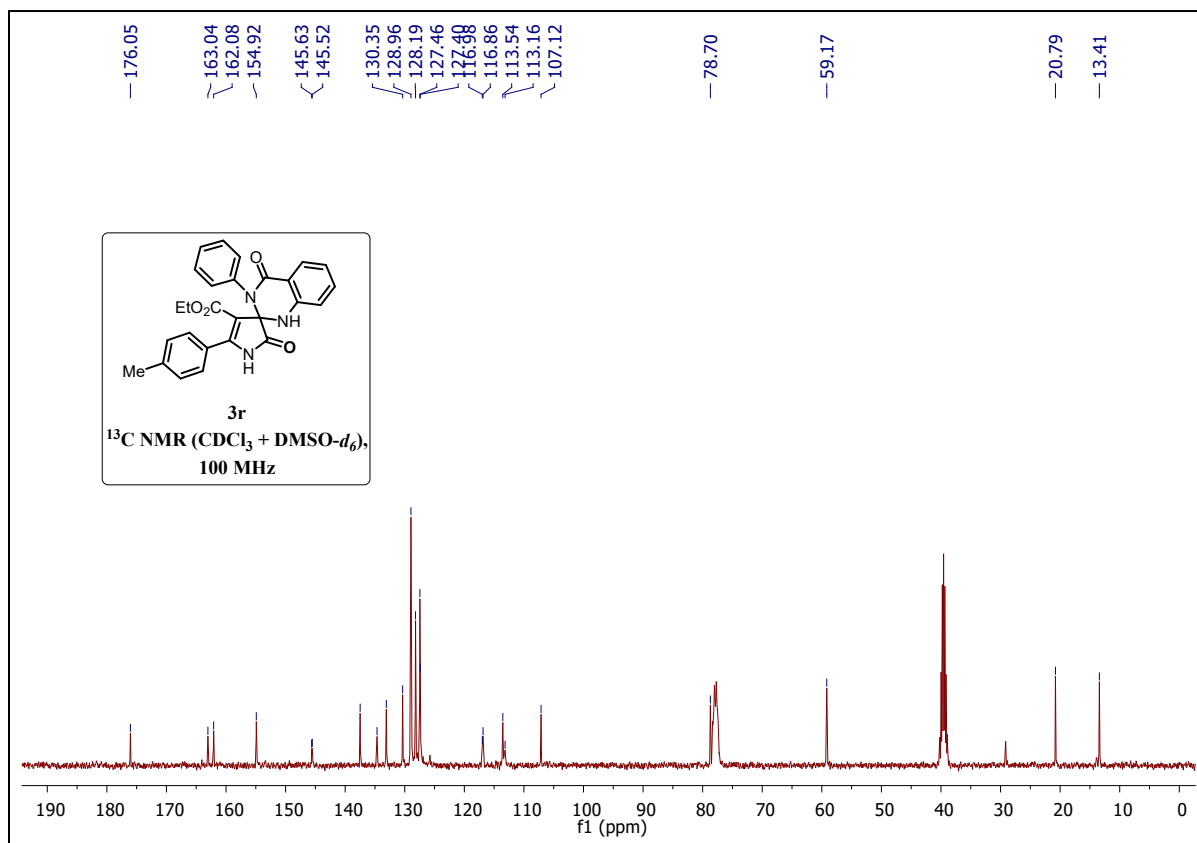

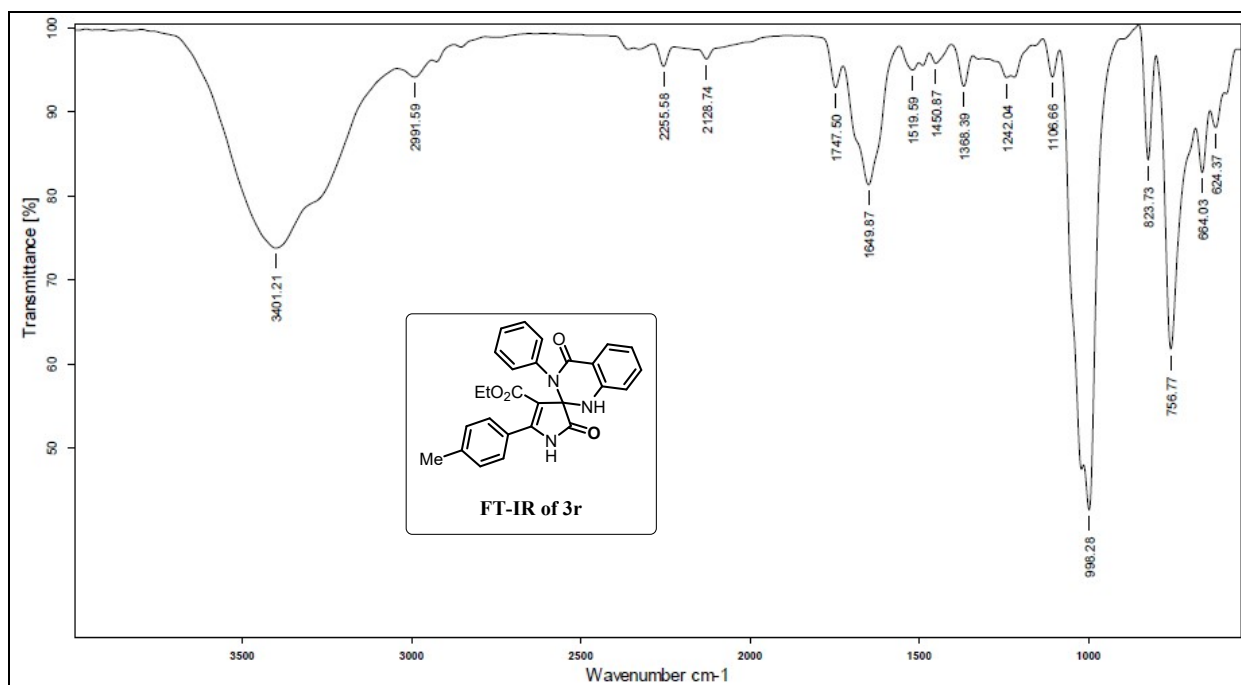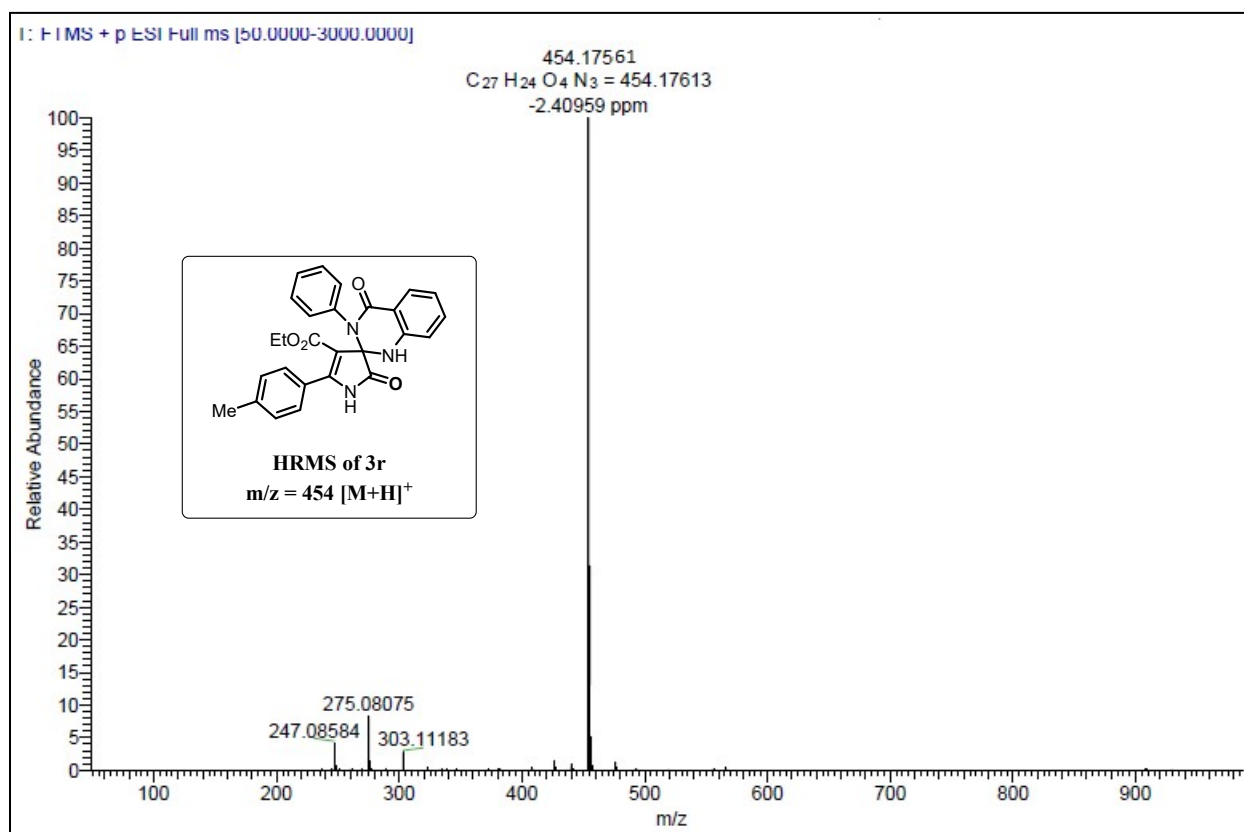

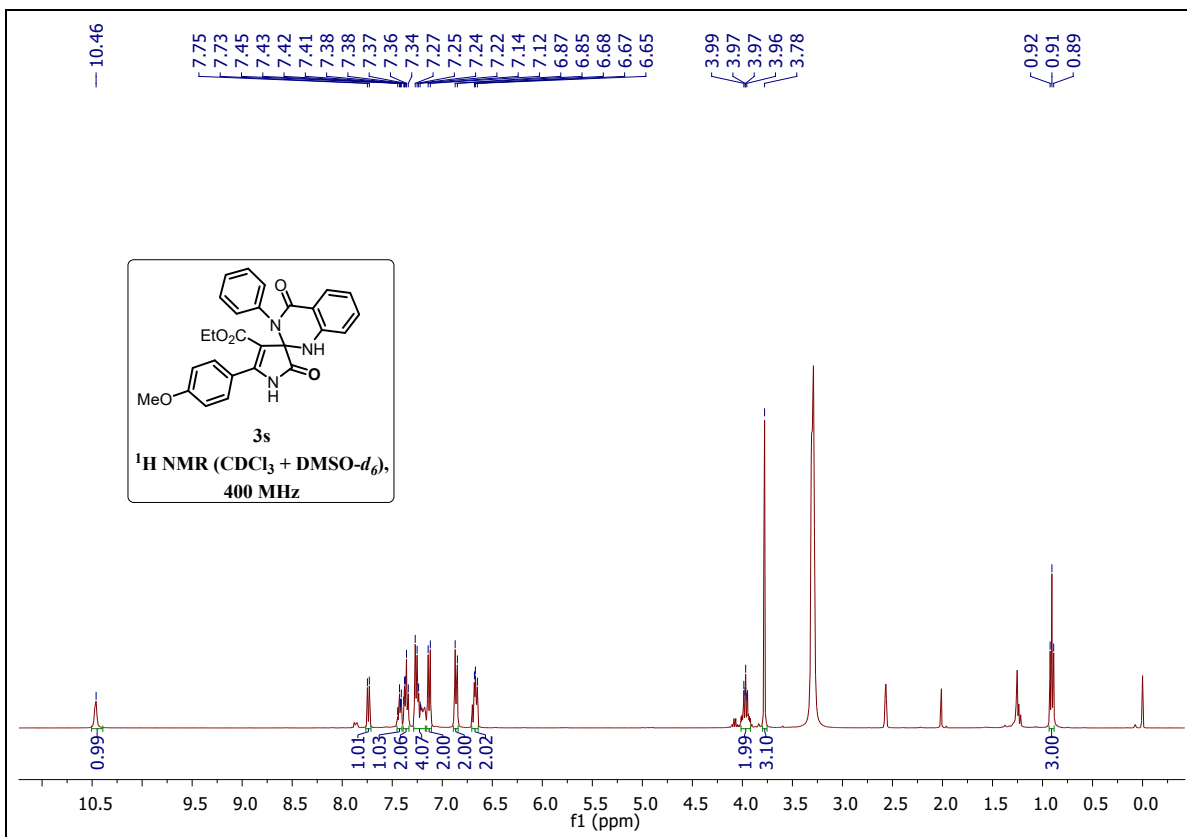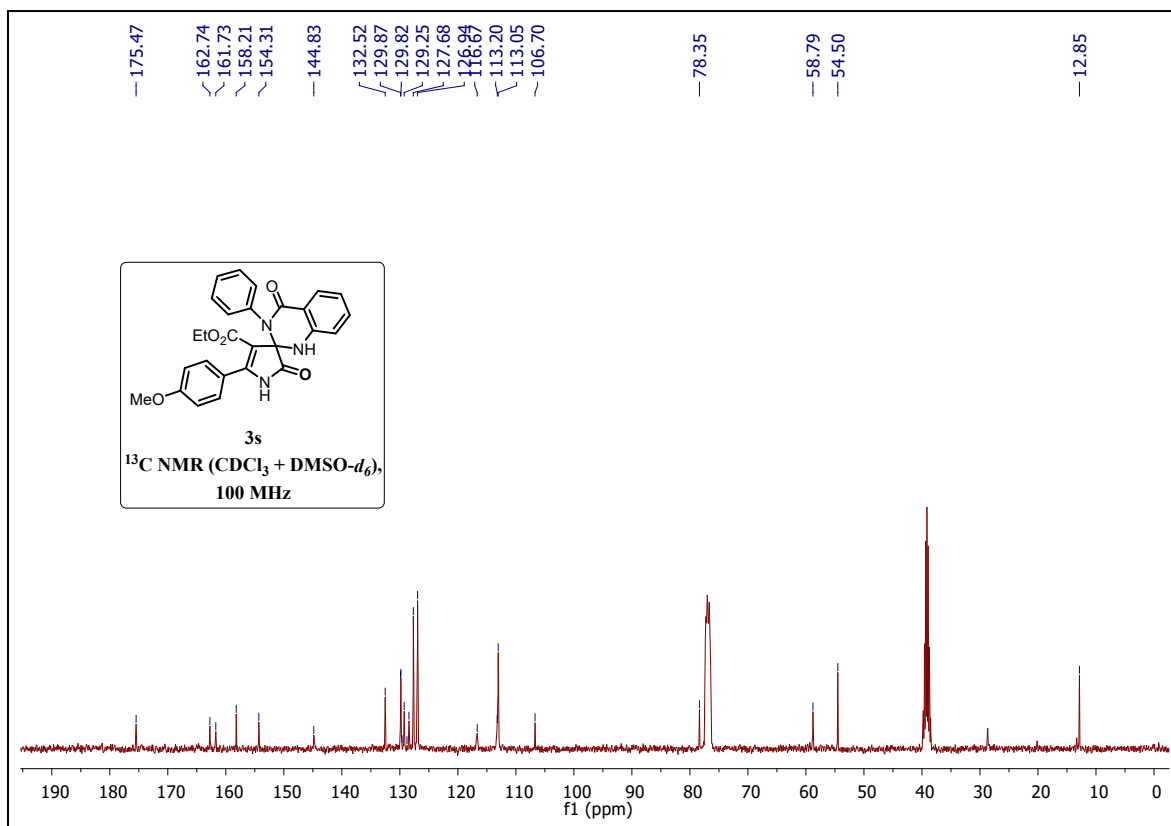

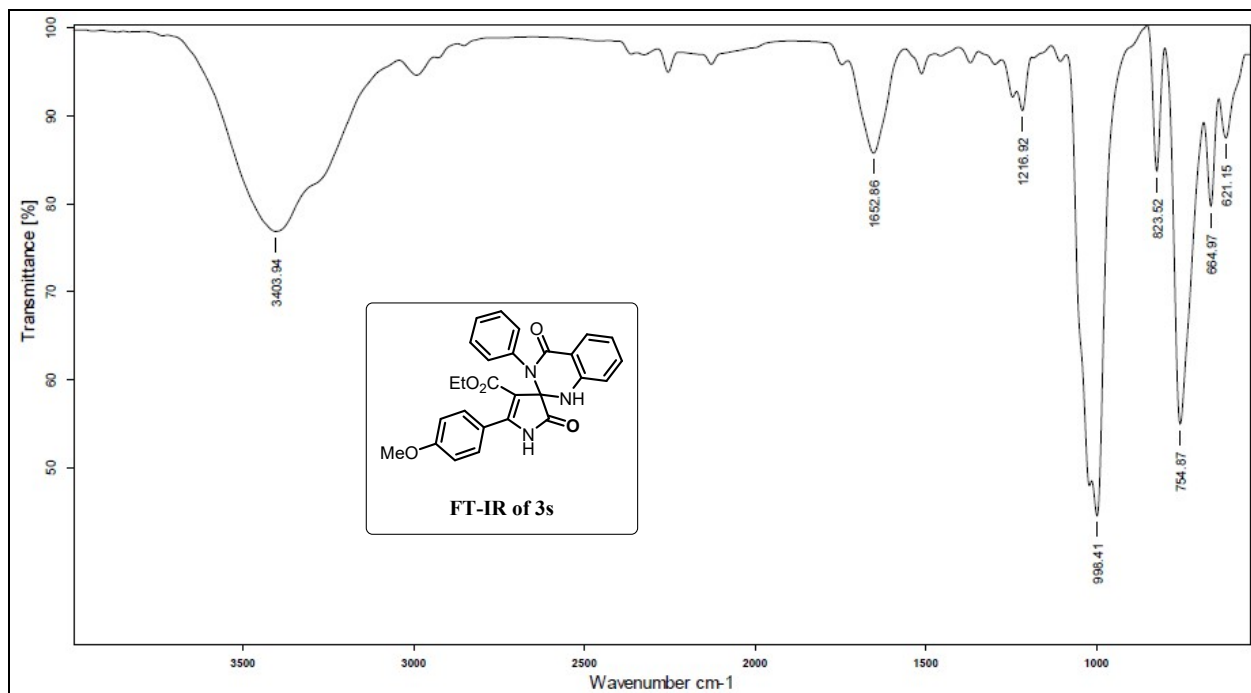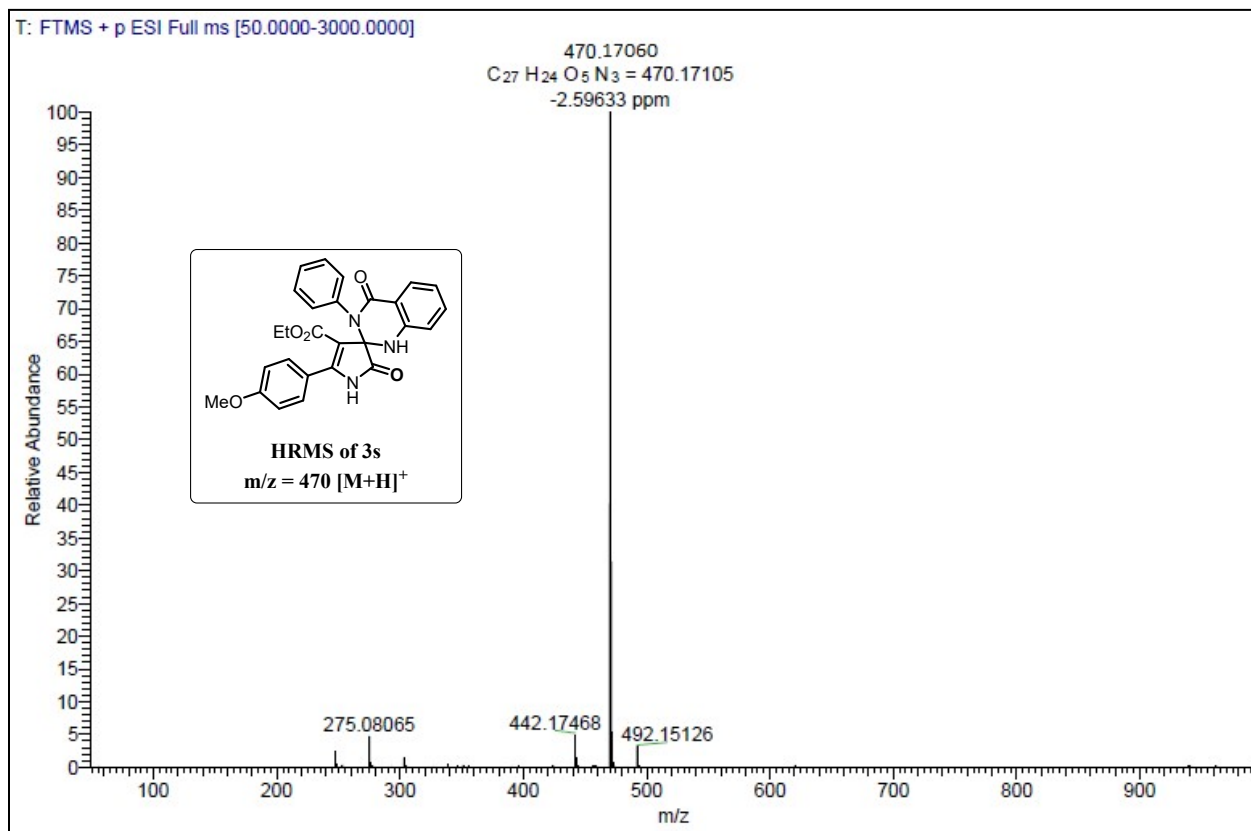

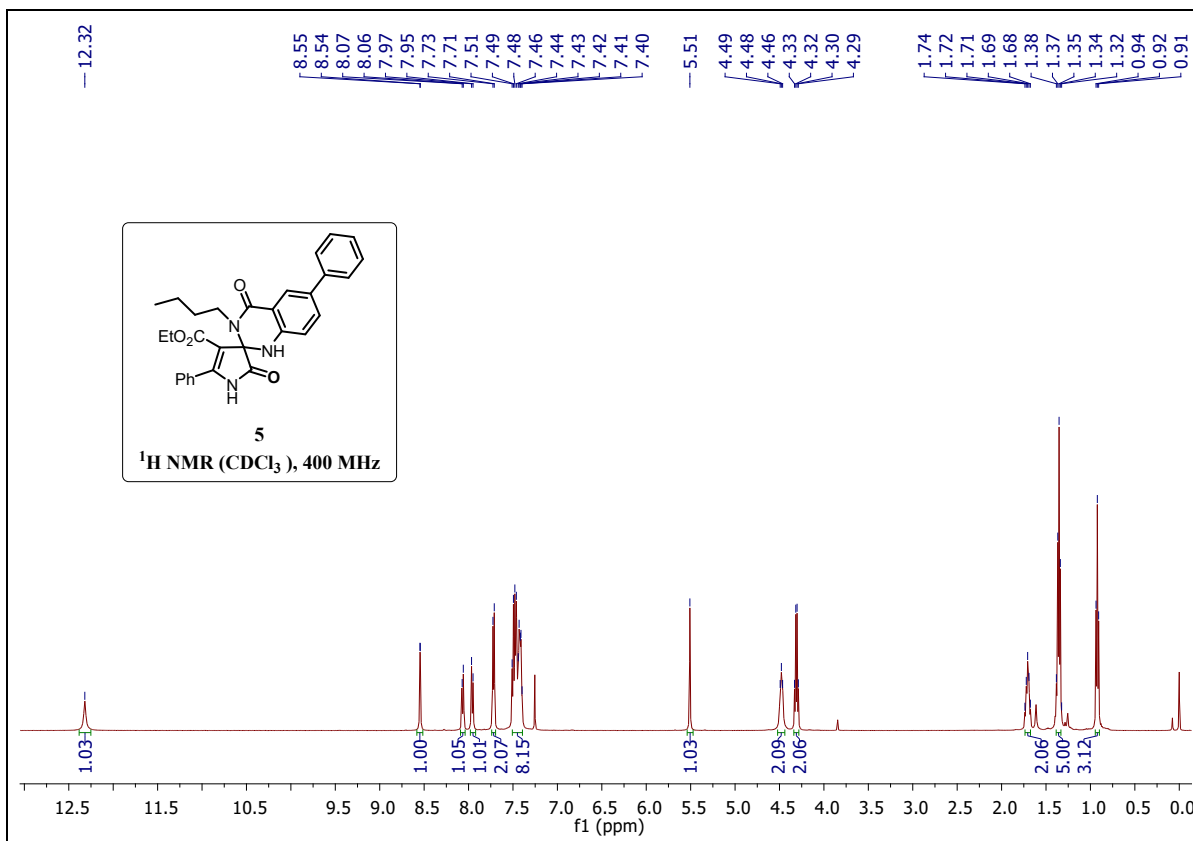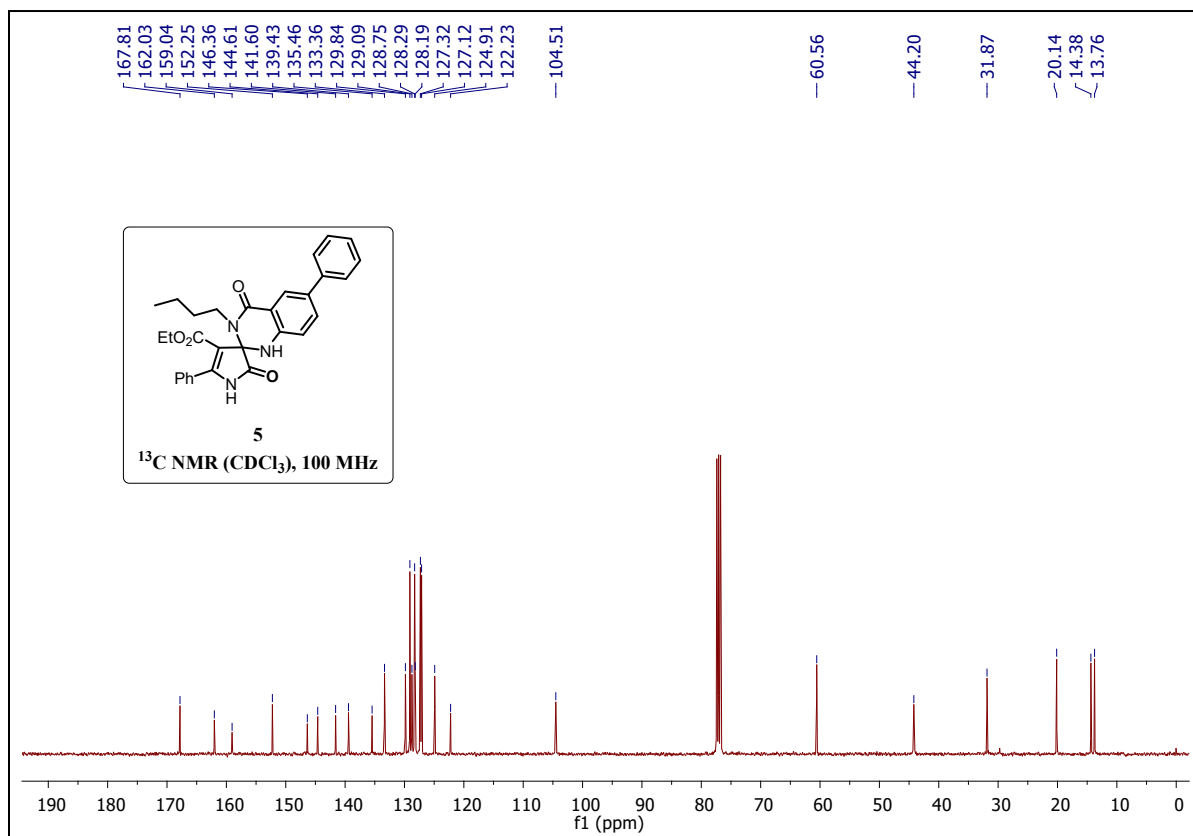



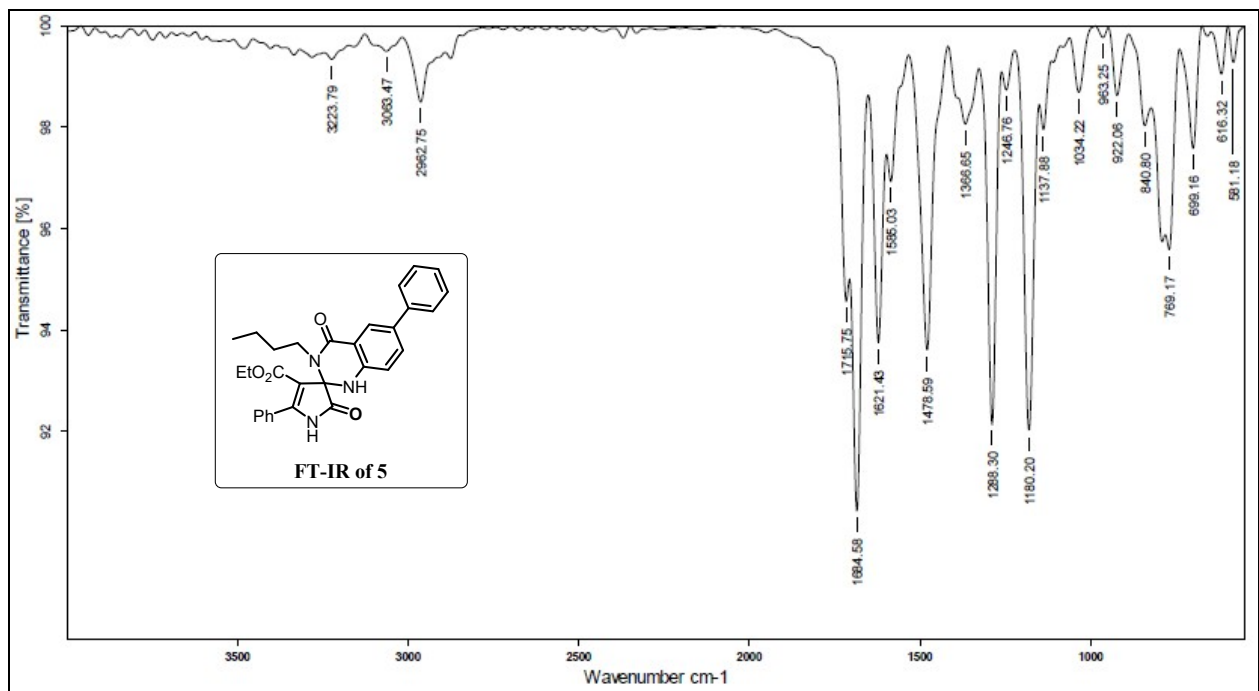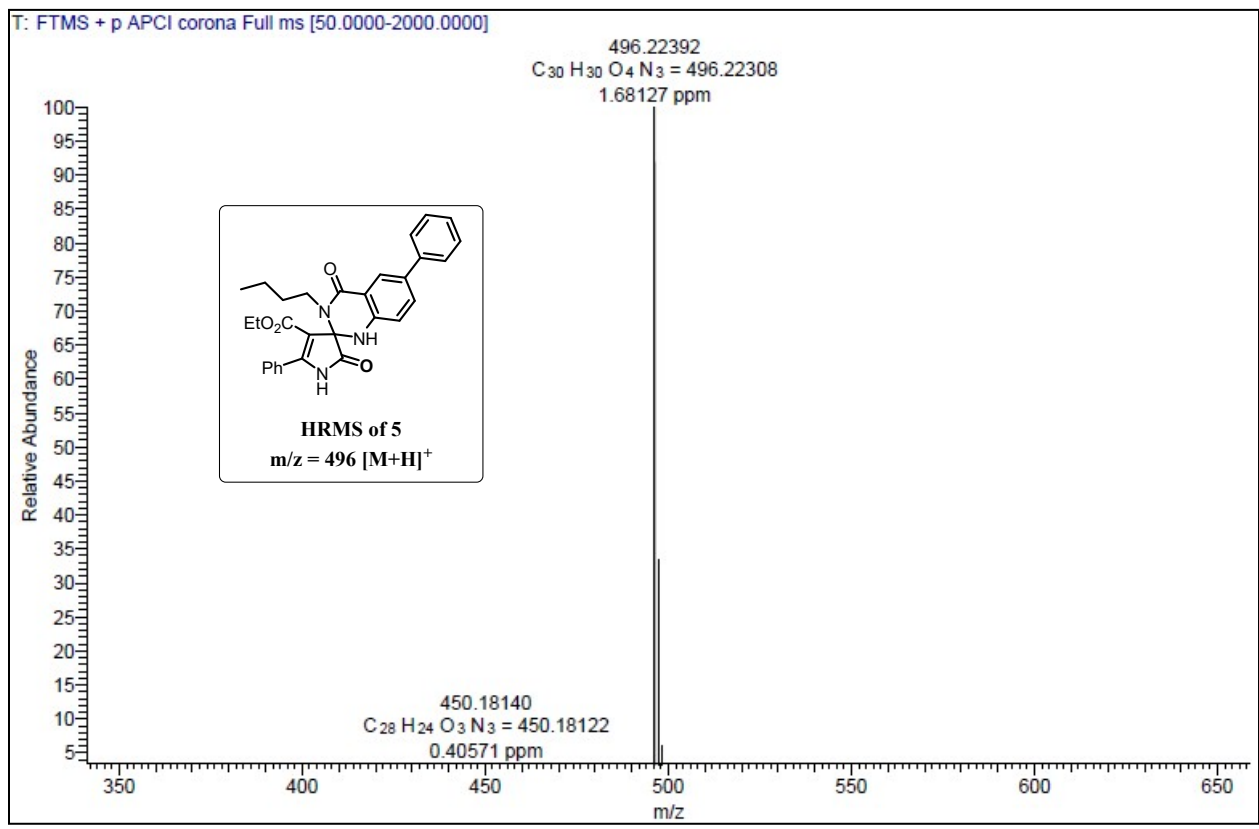

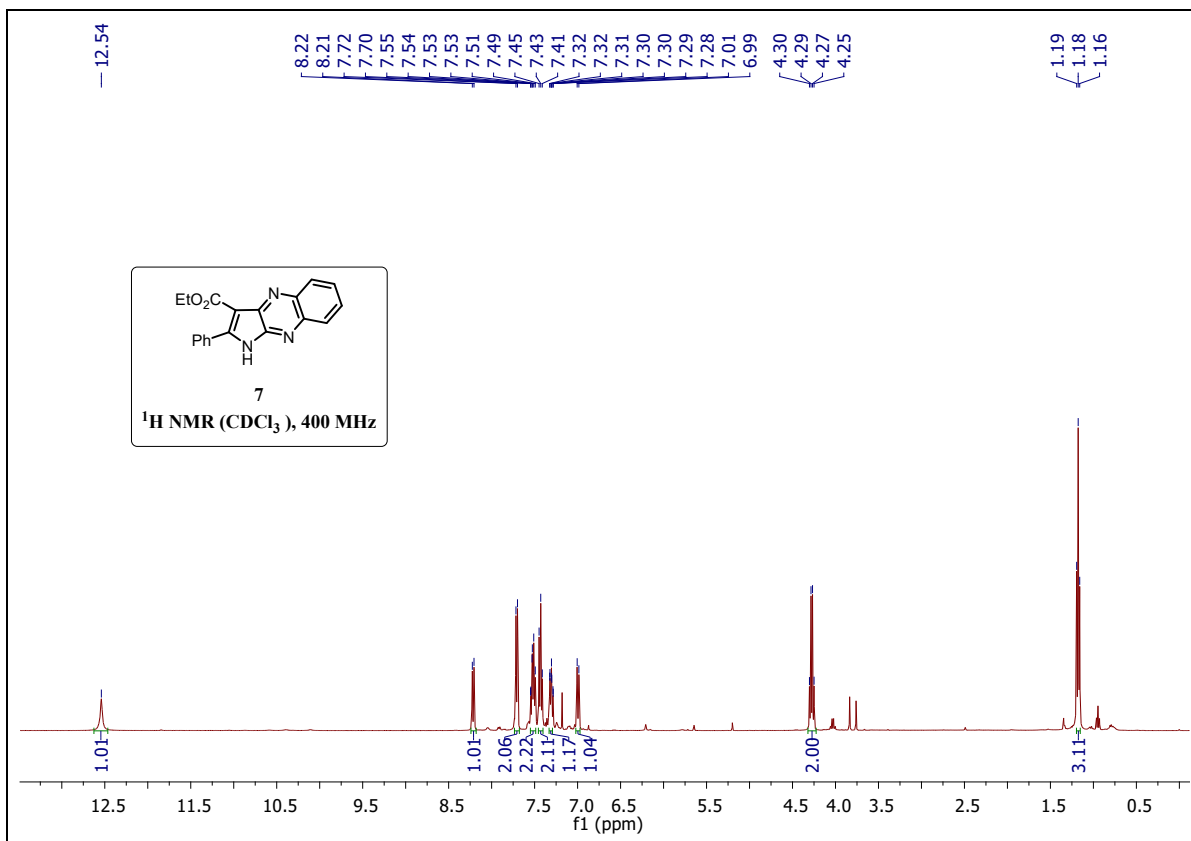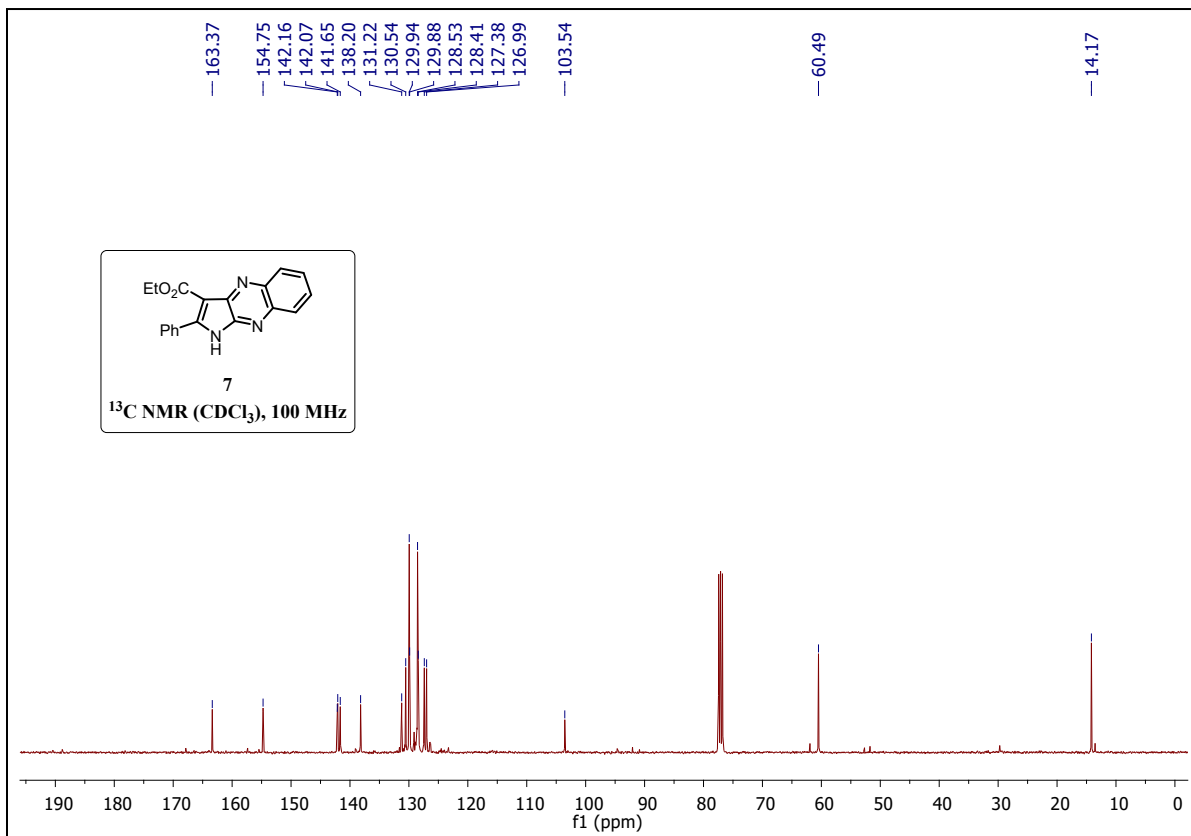

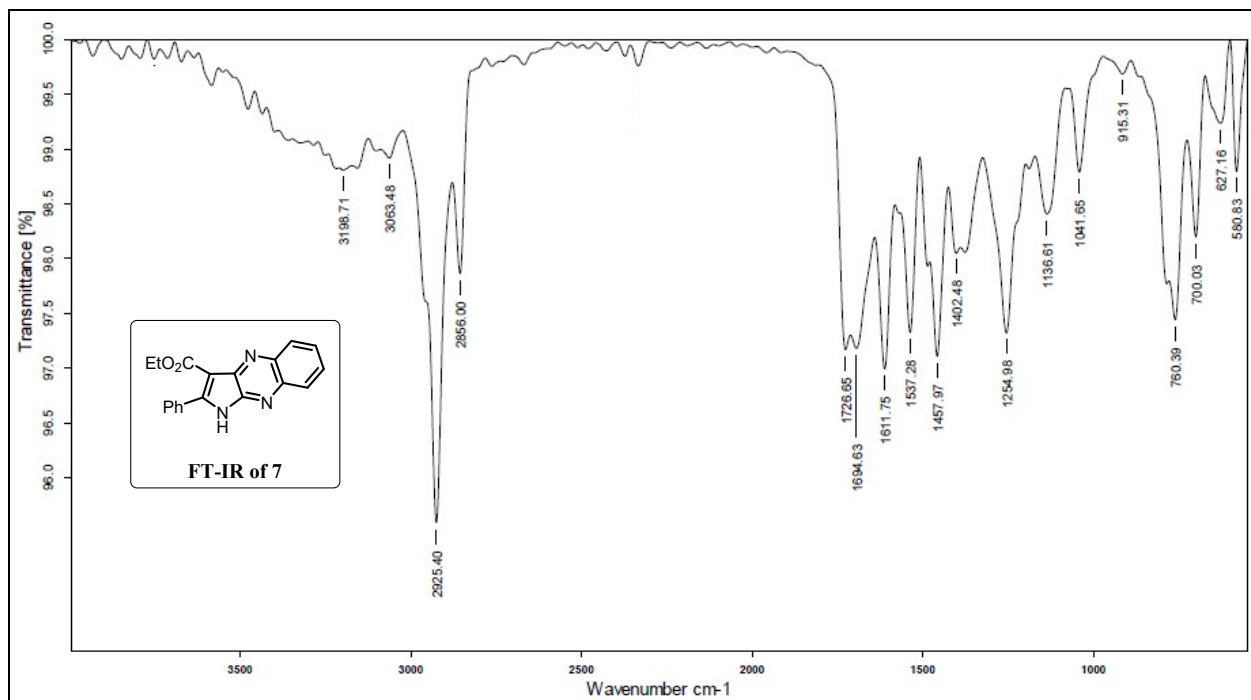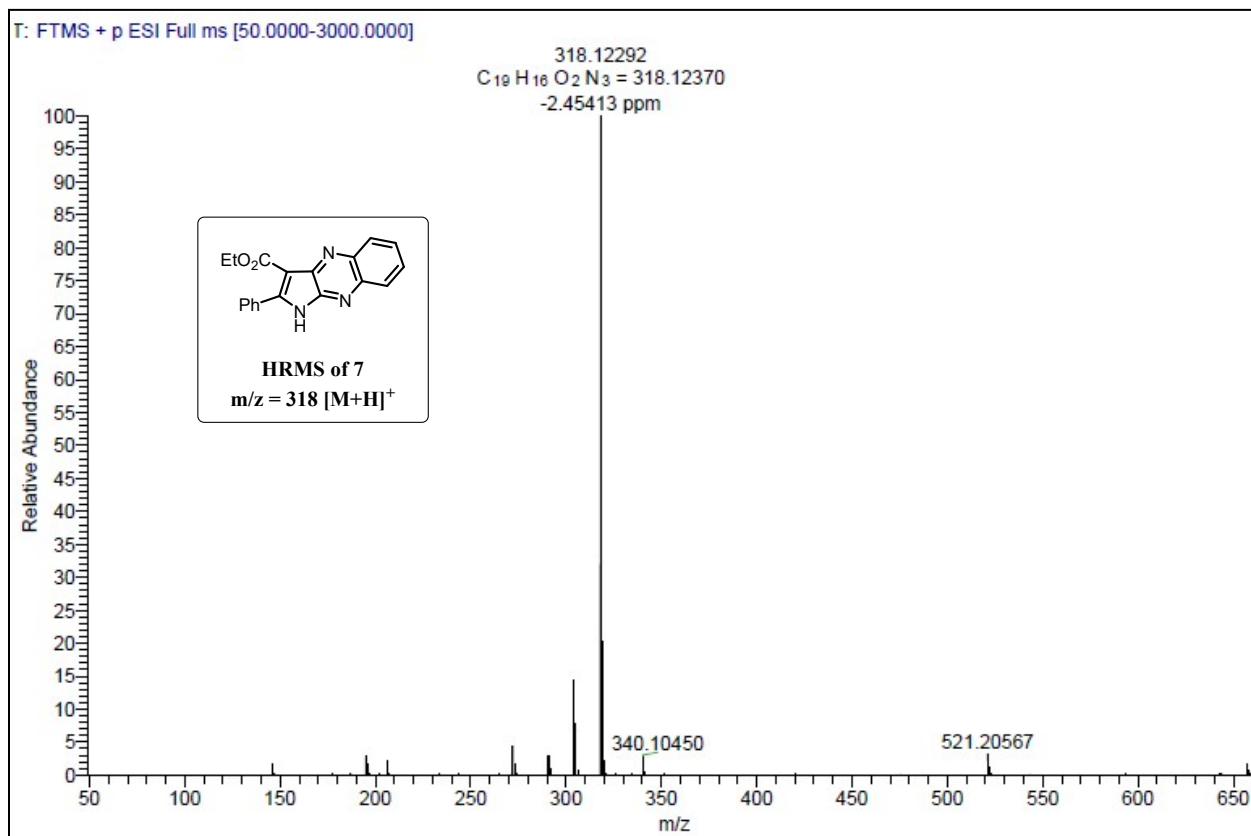

Supplement: d3ra02639f1.pdf [file d3ra02639f1.pdf]
